# Supplementary material for: Nonsense-Mediated Decay mainly targets short poly(A)-tailed mRNAs lacking a premature termination codon
Source: Research Square preprint supplement (doi:10.21203/rs.3.rs-6180226/v1), 2025-03-27
Supplement: Supplementary file 1 [file 12946d6ca0f2e45e43ecfe8a.xlsx]

## Sheet: GeneList
GeneID	Syst_name	Gene	Chr	Start	End	Strand	type	Categ
YHR010W_intron	YHR010W	RPL27A_i	chrVIII	126552	127112	+	gene	PTC_pos
YPL143W_intron	YPL143W	RPL33A_i	chrXVI	282141	282665	+	gene	PTC_pos
YBL050W_intron	YBL050W	SEC17_i	chrII	125155	125270	+	gene	PTC_pos
YPL031C_intron	YPL031C	PHO85_i	chrXVI	492919	493020	-	gene	PTC_pos
YER117W_intron	YER117W	RPL23B_i	chrV	396811	397281	+	gene	PTC_pos
YDR025W_intron	YDR025W	RPS11A_i	chrIV	491560	491898	+	gene	PTC_pos
YJL136C_intron	YJL136C	RPS21B_i	chrX	156790	157249	-	gene	PTC_pos
YFR045W_intron	YFR045W	YFR045W_i	chrVI	242010	242081	+	gene	PTC_pos
YHR097C_intron	YHR097C	YHR097C_i	chrVIII	298361	298484	-	gene	PTC_pos
YOL127W_intron	YOL127W	RPL25_i	chrXV	80361	80774	+	gene	PTC_pos
YHR101C_intron	YHR101C	BIG1_i	chrVIII	315772	315858	-	gene	PTC_pos
YBL026W_intron	YBL026W	LSM2_i	chrII	170677	170804	+	gene	PTC_pos
YGR214W_intron	YGR214W	RPS0A_i	chrVII	920665	921119	+	gene	PTC_pos
YPR187W_intron	YPR187W	RPO26_i	chrXVI	911277	911352	+	gene	PTC_pos
YAL003W_intron	YAL003W	EFB1_i	chrI	142254	142619	+	gene	PTC_pos
YMR116C_intron	YMR116C	ASC1_i	chrXIII	499879	500151	-	gene	PTC_pos
YML124C_intron	YML124C	TUB3_i	chrXIII	23361	23658	-	gene	PTC_pos
YOL120C_intron	YOL120C	RPL18A_i	chrXV	93844	94290	-	gene	PTC_pos
YOR096W_intron	YOR096W	RPS7A_i	chrXV	505938	506338	+	gene	PTC_pos
YBL087C_intron	YBL087C	RPL23A_i	chrII	60194	60697	-	gene	PTC_pos
YDL082W_intron	YDL082W	RPL13A_i	chrIV	308428	308792	+	gene	PTC_pos
YNL112W_intron	YNL112W	DBP2_i	chrXIV	414912	415913	+	gene	PTC_pos
YLR048W_intron	YLR048W	RPS0B_i	chrXII	242322	242680	+	gene	PTC_pos
YFL039C_intron	YFL039C	ACT1_i	chrVI	54378	54686	-	gene	PTC_pos
YDL029W_intron	YDL029W	ARP2_i	chrIV	399362	399484	+	gene	PTC_pos
YOR293W_intron	YOR293W	RPS10A_i	chrXV	867150	867586	+	gene	PTC_pos
YEL012W_intron	YEL012W	UBC8_i	chrV	131777	131899	+	gene	PTC_pos
YGL076C_intron	YGL076C	RPL7A_i	chrVII	364965	365432	-	gene	PTC_pos
YGL076C_intron	YGL076C	RPL7A_i	chrVII	365527	365985	-	gene	PTC_pos
YOR234C_intron	YOR234C	RPL33B_i	chrXV	778860	779386	-	gene	PTC_pos
YGR034W_intron	YGR034W	RPL26B_i	chrVII	555831	556307	+	gene	PTC_pos
YMR125W_intron	YMR125W	STO1_i	chrXIII	517564	517885	+	gene	PTC_pos
YKL157W_intron	YKL157W	APE2_i	chrXI	155272	155654	+	gene	PTC_pos
YBL040C_intron	YBL040C	ERD2_i	chrII	142750	142846	-	gene	PTC_pos
YGL137W_intron	YGL137W	SEC27_i	chrVII	249887	250086	+	gene	PTC_pos
YCL002C_intron	YCL002C	YCL002C_i	chrIII	111558	111633	-	gene	PTC_pos
YER133W_intron	YER133W	GLC7_i	chrV	432672	433196	+	gene	PTC_pos
YJL189W_intron	YJL189W	RPL39_i	chrX	75939	76324	+	gene	PTC_pos
YPR132W_intron	YPR132W	RPS23B_i	chrXVI	795030	795394	+	gene	PTC_pos
YKL002W_intron	YKL002W	DID4_i	chrXI	437838	437905	+	gene	PTC_pos
YML085C_intron	YML085C	TUB1_i	chrXIII	99260	99375	-	gene	PTC_pos
YLR344W_intron	YLR344W	RPL26A_i	chrXII	819331	819777	+	gene	PTC_pos
YDR367W_intron	YDR367W	KEI1_i	chrIV	1212878	1212978	+	gene	PTC_pos
YAL030W_intron	YAL030W	SNC1_i	chrI	87388	87500	+	gene	PTC_pos
YJL031C_intron	YJL031C	BET4_i	chrX	387349	387435	-	gene	PTC_pos
YER003C_intron	YER003C	PMI40_i	chrV	158995	159087	-	gene	PTC_pos
YFL031W_intron	YFL031W	HAC1_i	chrVI	75840	76091	+	gene	PTC_pos
YNR053C_intron	YNR053C	NOG2_i	chrXIV	721771	722302	-	gene	PTC_pos
YDL079C_intron	YDL079C	MRK1_i	chrIV	314045	314336	-	gene	PTC_pos
YGR183C_intron	YGR183C	QCR9_i	chrVII	859261	859473	-	gene	PTC_pos
YDR450W_intron	YDR450W	RPS18A_i	chrIV	1359970	1360404	+	gene	PTC_pos
YHR203C_intron	YHR203C	RPS4B_i	chrVIII	505248	505516	-	gene	PTC_pos
YDR059C_intron	YDR059C	UBC5_i	chrIV	569634	569723	-	gene	PTC_pos
YMR143W_intron	YMR143W	RPS16A_i	chrXIII	551952	552495	+	gene	PTC_pos
YDR381W_intron	YDR381W	YRA1_i	chrIV	1236843	1237608	+	gene	PTC_pos
YHR012W_intron	YHR012W	VPS29_i	chrVIII	129529	129647	+	gene	PTC_pos
YLR093C_intron	YLR093C	NYV1_i	chrXII	327259	327399	-	gene	PTC_pos
YPL218W_intron	YPL218W	SAR1_i	chrXVI	138726	138864	+	gene	PTC_pos
YBR230C_intron	YBR230C	OM14_i	chrII	679943	680039	-	gene	PTC_pos
YNL069C_intron	YNL069C	RPL16B_i	chrXIV	494525	494973	-	gene	PTC_pos
YMR079W_intron	YMR079W	SEC14_i	chrXIII	424998	425153	+	gene	PTC_pos
YDL075W_intron	YDL075W	RPL31A_i	chrIV	322283	322703	+	gene	PTC_pos
YCL005W-A_intron	YCL005W-A	VMA9_i	chrIII	107034	107110	+	gene	PTC_pos
YCL005W-A_intron	YCL005W-A	VMA9_i	chrIII	107192	107287	+	gene	PTC_pos
YPL249C-A_intron	YPL249C-A	RPL36B_i	chrXVI	75986	76223	-	gene	PTC_pos
YKL006C-A_intron	YKL006C-A	SFT1_i	chrXI	430456	430596	-	gene	PTC_pos
YHR001W-A_intron	YHR001W-A	QCR10_i	chrVIII	107832	107894	+	gene	PTC_pos
YIL156W-B_intron	YIL156W-B	YIL156W-B_i	chrIX	47699	47760	+	gene	PTC_pos
YER056C-A_intron	YER056C-A	RPL34A_i	chrV	269752	270148	-	gene	PTC_pos
YGL226C-A_intron	YGL226C-A	OST5_i	chrVII	72989	73137	-	gene	PTC_pos
YFL034C-B_intron	YFL034C-B	MOB2_i	chrVI	63860	63973	-	gene	PTC_pos
YER007C-A_intron	YER007C-A	TMA20_i	chrV	166772	166874	-	gene	PTC_pos
YMR142C_intron	YMR142C	RPL13B_i	chrXIII	550802	551203	-	gene	PTC_pos
YDR092W_intron	YDR092W	UBC13_i	chrIV	629906	630173	+	gene	PTC_pos
YKL180W_intron	YKL180W	RPL17A_i	chrXI	109578	109883	+	gene	PTC_pos
YDR139C_intron	YDR139C	RUB1_i	chrIV	733703	733775	-	gene	PTC_pos
YDL130W_intron	YDL130W	RPP1B_i	chrIV	230020	230320	+	gene	PTC_pos
YIL052C_intron	YIL052C	RPL34B_i	chrIX	256555	257026	-	gene	PTC_pos
YKL081W_intron	YKL081W	TEF4_i	chrXI	283096	283421	+	gene	PTC_pos
YNL301C_intron	YNL301C	RPL18B_i	chrXIV	64019	64450	-	gene	PTC_pos
YKR094C_intron	YKR094C	RPL40B_i	chrXI	618375	618742	-	gene	PTC_pos
YPL081W_intron	YPL081W	RPS9A_i	chrXVI	404957	405457	+	gene	PTC_pos
YKR057W_intron	YKR057W	RPS21A_i	chrXI	551681	552002	+	gene	PTC_pos
YPR028W_intron	YPR028W	YOP1_i	chrXVI	623578	623710	+	gene	PTC_pos
YML094W_intron	YML094W	GIM5_i	chrXIII	82291	82373	+	gene	PTC_pos
YPR043W_intron	YPR043W	RPL43A_i	chrXVI	654168	654570	+	gene	PTC_pos
YIL018W_intron	YIL018W	RPL2B_i	chrIX	316772	317171	+	gene	PTC_pos
YMR230W_intron	YMR230W	RPS10B_i	chrXIII	732466	732875	+	gene	PTC_pos
YDL083C_intron	YDL083C	RPS16B_i	chrIV	307334	307765	-	gene	PTC_pos
YHL001W_intron	YHL001W	RPL14B_i	chrVIII	104406	104803	+	gene	PTC_pos
YLL050C_intron	YLL050C	COF1_i	chrXII	40222	40400	-	gene	PTC_pos
YNL265C_intron	YNL265C	IST1_i	chrXIV	145150	145254	-	gene	PTC_pos
YML024W_intron	YML024W	RPS17A_i	chrXIII	225892	226289	+	gene	PTC_pos
YML073C_intron	YML073C	RPL6A_i	chrXIII	123743	124157	-	gene	PTC_pos
YOR182C_intron	YOR182C	RPS30B_i	chrXV	678380	678790	-	gene	PTC_pos
YDR424C_intron	YDR424C	DYN2_i	chrIV	1319618	1319697	-	gene	PTC_pos
YDR424C_intron	YDR424C	DYN2_i	chrIV	1319721	1319816	-	gene	PTC_pos
YIL133C_intron	YIL133C	RPL16A_i	chrIX	99096	99385	-	gene	PTC_pos
YGR118W_intron	YGR118W	RPS23A_i	chrVII	727039	727357	+	gene	PTC_pos
YIL148W_intron	YIL148W	RPL40A_i	chrIX	68716	69149	+	gene	PTC_pos
YPR063C_intron	YPR063C	YPR063C_i	chrXVI	678194	678279	-	gene	PTC_pos
YDR129C_intron	YDR129C	SAC6_i	chrIV	715248	715358	-	gene	PTC_pos
YCR028C-A_intron	YCR028C-A	RIM1_i	chrIII	173116	173198	-	gene	PTC_pos
YBR255C-A_intron	YBR255C-A	RCF3_i	chrII	726918	727011	-	gene	PTC_pos
YPR170W-B_intron	YPR170W-B	YPR170W-B_i	chrXVI	883388	883486	+	gene	PTC_pos
YHR039C-A_intron	YHR039C-A	VMA10_i	chrVIII	187515	187676	-	gene	PTC_pos
YGL251C_intron	YGL251C	HFM1_i	chrVII	31427	31578	-	gene	PTC
YDL115C_intron	YDL115C	IWR1_i	chrIV	254975	255044	-	gene	PTC
YGL103W_intron	YGL103W	RPL28_i	chrVII	311016	311526	+	gene	PTC
YKL156W_intron	YKL156W	RPS27A_i	chrXI	158616	158966	+	gene	PTC
YJR021C_intron	YJR021C	REC107_i	chrX	469184	469263	-	gene	PTC
YHL050C_intron	YHL050C	YHL050C_i	chrVIII	1898	2670	-	gene	PTC
YPR202W_intron	YPR202W	YPR202W_i	chrXVI	943051	943198	+	gene	PTC
YHR199C-A_intron	YHR199C-A	NBL1_i	chrVIII	498720	498786	-	gene	PTC
YER014C-A_intron	YER014C-A	BUD25_i	chrV	184170	184677	-	gene	PTC
YFL034C-A_intron	YFL034C-A	RPL22B_i	chrVI	64600	64920	-	gene	PTC
YML056C_intron	YML056C	IMD4_i	chrXIII	163309	163716	-	gene	PTC_pos
YLR078C_intron	YLR078C	BOS1_i	chrXII	286468	286556	-	gene	PTC_pos
YDR064W_intron	YDR064W	RPS13_i	chrIV	579479	580017	+	gene	PTC_pos
YJL177W_intron	YJL177W	RPL17B_i	chrX	91095	91411	+	gene	PTC_pos
YDL108W_intron	YDL108W	KIN28_i	chrIV	267726	267806	+	gene	PTC_pos
YPR098C_intron	YPR098C	YPR098C_i	chrXVI	729386	729481	-	gene	PTC_pos
YIL111W_intron	YIL111W	COX5B_i	chrIX	155223	155310	+	gene	PTC_pos
YLR448W_intron	YLR448W	RPL6B_i	chrXII	1028869	1029252	+	gene	PTC_pos
YDR397C_intron	YDR397C	NCB2_i	chrIV	1266770	1266861	-	gene	PTC_pos
YHR021C_intron	YHR021C	RPS27B_i	chrVIII	148117	148666	-	gene	PTC_pos
YJL001W_intron	YJL001W	PRE3_i	chrX	435228	435343	+	gene	PTC_pos
YJR145C_intron	YJR145C	RPS4A_i	chrX	702799	703054	-	gene	PTC_pos
YDL012C_intron	YDL012C	YDL012C_i	chrIV	431387	431472	-	gene	PTC_pos
YDR500C_intron	YDR500C	RPL37B_i	chrIV	1450458	1450846	-	gene	PTC_pos
YMR242C_intron	YMR242C	RPL20A_i	chrXIII	753743	754219	-	gene	PTC_pos
YDL191W_intron	YDL191W	RPL35A_i	chrIV	117667	118157	+	gene	PTC_pos
YML026C_intron	YML026C	RPS18B_i	chrXIII	223381	223781	-	gene	PTC_pos
YGL030W_intron	YGL030W	RPL30_i	chrVII	439094	439323	+	gene	PTC_pos
YLR406C_intron	YLR406C	RPL31B_i	chrXII	931350	931698	-	gene	PTC_pos
YLR061W_intron	YLR061W	RPL22A_i	chrXII	263206	263594	+	gene	PTC_pos
YBR062C_intron	YBR062C	YBR062C_i	chrII	366503	366584	-	gene	PTC_pos
YDR471W_intron	YDR471W	RPL27B_i	chrIV	1401801	1402184	+	gene	PTC_pos
YDR005C_intron	YDR005C	MAF1_i	chrIV	458018	458097	-	gene	PTC_pos
YKL006W_intron	YKL006W	RPL14A_i	chrXI	432035	432432	+	gene	PTC_pos
YCR031C_intron	YCR031C	RPS14A_i	chrIII	177907	178213	-	gene	PTC_pos
YNL038W_intron	YNL038W	GPI15_i	chrXIV	557611	557684	+	gene	PTC_pos
YNL162W_intron	YNL162W	RPL42A_i	chrXIV	331326	331837	+	gene	PTC_pos
YLR185W_intron	YLR185W	RPL37A_i	chrXII	522670	523028	+	gene	PTC_pos
YPL241C_intron	YPL241C	CIN2_i	chrXVI	96154	96233	-	gene	PTC_pos
YOR312C_intron	YOR312C	RPL20B_i	chrXV	900768	901193	-	gene	PTC_pos
YOR122C_intron	YOR122C	PFY1_i	chrXV	552666	552874	-	gene	PTC_pos
YLR316C_intron	YLR316C	TAD3_i	chrXII	766074	766129	-	gene	PTC_pos
YLR316C_intron	YLR316C	TAD3_i	chrXII	766182	766249	-	gene	PTC_pos
YNL302C_intron	YNL302C	RPS19B_i	chrXIV	62373	62923	-	gene	PTC_pos
YOL121C_intron	YOL121C	RPS19A_i	chrXV	92441	92830	-	gene	PTC_pos
YMR194W_intron	YMR194W	RPL36A_i	chrXIII	651161	651623	+	gene	PTC_pos
YNL096C_intron	YNL096C	RPS7B_i	chrXIV	443827	444171	-	gene	PTC_pos
YDR318W_intron	YDR318W	MCM21_i	chrIV	1103810	1103892	+	gene	PTC_pos
YHR077C_intron	YHR077C	NMD2_i	chrVIII	255638	255750	-	gene	PTC_pos
YHR041C_intron	YHR041C	SRB2_i	chrVIII	189750	189850	-	gene	PTC_pos
YNL004W_intron	YNL004W	HRB1_i	chrXIV	622945	623286	+	gene	PTC_pos
YBR181C_intron	YBR181C	RPS6B_i	chrII	592417	592768	-	gene	PTC_pos
YGL183C_intron	YGL183C	MND1_i	chrVII	157200	157282	-	gene	PTC_pos
YML025C_intron	YML025C	YML6_i	chrXIII	225240	225338	-	gene	PTC_pos
YHR141C_intron	YHR141C	RPL42B_i	chrVIII	382307	382747	-	gene	PTC_pos
YJL041W_intron	YJL041W	NSP1_i	chrX	365785	365902	+	gene	PTC_pos
YPL175W_intron	YPL175W	SPT14_i	chrXVI	218647	218746	+	gene	PTC_pos
YPL198W_intron	YPL198W	RPL7B_i	chrXVI	173163	173571	+	gene	PTC_pos
YPL198W_intron	YPL198W	RPL7B_i	chrXVI	173666	174072	+	gene	PTC_pos
YBL018C_intron	YBL018C	POP8_i	chrII	186353	186427	-	gene	PTC_pos
YGR029W_intron	YGR029W	ERV1_i	chrVII	543639	543721	+	gene	PTC_pos
YMR033W_intron	YMR033W	ARP9_i	chrXIII	337818	337903	+	gene	PTC_pos
YBR191W_intron	YBR191W	RPL21A_i	chrII	606281	606668	+	gene	PTC_pos
YPL075W_intron	YPL075W	GCR1_i	chrXVI	412262	413012	+	gene	PTC_pos
YER074W_intron	YER074W	RPS24A_i	chrV	306326	306791	+	gene	PTC_pos
YDR447C_intron	YDR447C	RPS17B_i	chrIV	1355237	1355550	-	gene	PTC_pos
YLR211C_intron	YLR211C	ATG38_i	chrXII	564455	564513	-	gene	PTC_pos
YLR306W_intron	YLR306W	UBC12_i	chrXII	744154	744287	+	gene	PTC_pos
YIL069C_intron	YIL069C	RPS24B_i	chrIX	231958	232366	-	gene	PTC_pos
YLR367W_intron	YLR367W	RPS22B_i	chrXII	856575	857057	+	gene	PTC_pos
YPR153W_intron	YPR153W	MAY24_i	chrXVI	833694	833827	+	gene	PTC_pos
YBR189W_intron	YBR189W	RPS9B_i	chrII	604515	604927	+	gene	PTC_pos
YPL079W_intron	YPL079W	RPL21B_i	chrXVI	406647	407067	+	gene	PTC_pos
YDL136W_intron	YDL136W	RPL35B_i	chrIV	217603	218007	+	gene	PTC_pos
YKR004C_intron	YKR004C	ECM9_i	chrXI	447707	447810	-	gene	PTC_pos
YJL024C_intron	YJL024C	APS3_i	chrX	396494	396570	-	gene	PTC_pos
YBR048W_intron	YBR048W	RPS11B_i	chrII	332876	333386	+	gene	PTC_pos
YBL027W_intron	YBL027W	RPL19B_i	chrII	168425	168808	+	gene	PTC_pos
YJR094W-A_intron	YJR094W-A	RPL43B_i	chrX	608307	608581	+	gene	PTC_pos
YNL138W-A_intron	YNL138W-A	YSF3_i	chrXIV	366036	366157	+	gene	PTC_pos
YFR031C-A_intron	YFR031C-A	RPL2A_i	chrVI	221268	221414	-	gene	PTC_pos
YLR287C-A_intron	YLR287C-A	RPS30A_i	chrXII	712726	713155	-	gene	PTC_pos
YBR111W-A_intron	YBR111W-A	SUS1_i	chrII	462210	462289	+	gene	PTC_pos
YBR111W-A_intron	YBR111W-A	SUS1_i	chrII	462430	462499	+	gene	PTC_pos
YBR084C-A_intron	YBR084C-A	RPL19A_i	chrII	414754	415259	-	gene	PTC_pos
YGR001C_intron	YGR001C	EFM5_i	chrVII	497366	497458	-	gene	unknown
YGR001C_intron	YGR001C	EFM5_i	chrVII	497938	497999	-	gene	unknown
YJR079W_intron	YJR079W	YJR079W_i	chrX	580348	581052	+	gene	unknown
YMR133W_intron	YMR133W	REC114_i	chrXIII	537449	537564	+	gene	unknown
YOL048C_intron	YOL048C	RRT8_i	chrXV	240948	241025	-	gene	unknown
YLL066C_intron	YLL066C	YLL066C_i	chrXII	9451	9549	-	gene	unknown
YGR296W_intron	YGR296W	YRF1-3_i	chrVII	1084883	1085030	+	gene	unknown
YIL106W_intron	YIL106W	MOB1_i	chrIX	166435	166519	+	gene	unknown
YIL004C_intron	YIL004C	BET1_i	chrIX	348364	348494	-	gene	unknown
YNL050C_intron	YNL050C	YNL050C_i	chrXIV	534875	534965	-	gene	unknown
YEL003W_intron	YEL003W	GIM4_i	chrV	148195	148282	+	gene	unknown
YPL109C_intron	YPL109C	YPL109C_i	chrXVI	345445	345596	-	gene	unknown
YMR292W_intron	YMR292W	GOT1_i	chrXIII	854817	854898	+	gene	unknown
YPL283C_intron	YPL283C	YRF1-7_i	chrXVI	5841	5988	-	gene	unknown
YAL001C_intron	YAL001C	TFC3_i	chrI	151007	151096	-	gene	unknown
YJL191W_intron	YJL191W	RPS14B_i	chrX	73797	74204	+	gene	unknown
YLR128W_intron	YLR128W	DCN1_i	chrXII	398533	398626	+	gene	unknown
YHR016C_intron	YHR016C	YSC84_i	chrVIII	138241	138408	-	gene	unknown
YNL312W_intron	YNL312W	RFA2_i	chrXIV	48294	48401	+	gene	unknown
YBR090C_intron	YBR090C	YBR090C_i	chrII	426517	426873	-	gene	unknown
YLR426W_intron	YLR426W	TDA5_i	chrXII	987142	987212	+	gene	unknown
YER179W_intron	YER179W	DMC1_i	chrV	548553	548644	+	gene	unknown
YNL147W_intron	YNL147W	LSM7_i	chrXIV	350958	351053	+	gene	unknown
YPL090C_intron	YPL090C	RPS6A_i	chrXVI	377996	378389	-	gene	unknown
YBR082C_intron	YBR082C	UBC4_i	chrII	407028	407122	-	gene	unknown
YGL232W_intron	YGL232W	TAN1_i	chrVII	62132	62189	+	gene	unknown
YMR201C_intron	YMR201C	RAD14_i	chrXIII	666934	667017	-	gene	unknown
YLR445W_intron	YLR445W	GMC2_i	chrXII	1024573	1024654	+	gene	unknown
YNL044W_intron	YNL044W	YIP3_i	chrXIV	545292	545370	+	gene	unknown
YKR005C_intron	YKR005C	YKR005C_i	chrXI	449952	450020	-	gene	unknown
YLR054C_intron	YLR054C	OSW2_i	chrXII	250861	250947	-	gene	unknown
YMR225C_intron	YMR225C	MRPL44_i	chrXIII	721199	721345	-	gene	unknown
YLR199C_intron	YLR199C	PBA1_i	chrXII	548678	548763	-	gene	unknown
YBL111C_intron	YBL111C	YBL111C_i	chrII	4117	4215	-	gene	unknown
YBR215W_intron	YBR215W	HPC2_i	chrII	653369	653452	+	gene	unknown
YCL012C_intron	YCL012C	YCL012C_i	chrIII	101634	101700	-	gene	unknown
YIL177C_intron	YIL177C	YIL177C_i	chrIX	4599	4986	-	gene	unknown
YCR097W_intron	YCR097W	HMRA1_i	chrIII	293940	293993	+	gene	unknown
YCR097W_intron	YCR097W	HMRA1_i	chrIII	294240	294291	+	gene	unknown
YBR186W_intron	YBR186W	PCH2_i	chrII	602104	602216	+	gene	unknown
YLR464W_intron	YLR464W	YLR464W_i	chrXII	1067085	1067363	+	gene	unknown
YNL246W_intron	YNL246W	VPS75_i	chrXIV	185492	185586	+	gene	unknown
YML017W_intron	YML017W	PSP2_i	chrXIII	236592	236953	+	gene	unknown
YBR219C_intron	YBR219C	YBR219C_i	chrII	662582	663002	-	gene	unknown
YKL190W_intron	YKL190W	CNB1_i	chrXI	82999	83074	+	gene	unknown
YPL129W_intron	YPL129W	TAF14_i	chrXVI	305307	305411	+	gene	unknown
YLR275W_intron	YLR275W	SMD2_i	chrXII	694383	694472	+	gene	unknown
YHR218W_intron	YHR218W	YHR218W_i	chrVIII	558616	558714	+	gene	unknown
YDL219W_intron	YDL219W	DTD1_i	chrIV	65307	65377	+	gene	unknown
YIL073C_intron	YIL073C	SPO22_i	chrIX	225810	225899	-	gene	unknown
YNL130C_intron	YNL130C	CPT1_i	chrXIV	380690	380781	-	gene	unknown
YHR123W_intron	YHR123W	EPT1_i	chrVIII	354865	354955	+	gene	unknown
YDR305C_intron	YDR305C	HNT2_i	chrIV	1073313	1073401	-	gene	unknown
YNL012W_intron	YNL012W	SPO1_i	chrXIV	609791	609874	+	gene	unknown
YNL339C_intron	YNL339C	YRF1-6_i	chrXIV	5932	6079	-	gene	unknown
YLR329W_intron	YLR329W	REC102_i	chrXII	786616	786712	+	gene	unknown
YML034W_intron	YML034W	SRC1_i	chrXIII	211445	211570	+	gene	unknown
YGL087C_intron	YGL087C	MMS2_i	chrVII	346809	346893	-	gene	unknown
YJL225C_intron	YJL225C	YJL225C_i	chrX	4582	4969	-	gene	unknown
YML133C_intron	YML133C	YML133C_i	chrXIII	3792	3890	-	gene	unknown
YBL059W_intron	YBL059W	YBL059W_i	chrII	110880	110948	+	gene	unknown
YDL064W_intron	YDL064W	UBC9_i	chrIV	337525	337634	+	gene	unknown
YGL033W_intron	YGL033W	HOP2_i	chrVII	435680	435749	+	gene	unknown
YGL033W_intron	YGL033W	HOP2_i	chrVII	436313	436374	+	gene	unknown
YGR225W_intron	YGR225W	AMA1_i	chrVII	946328	946420	+	gene	unknown
YML067C_intron	YML067C	ERV41_i	chrXIII	140091	140183	-	gene	unknown
YGL178W_intron	YGL178W	MPT5_i	chrVII	167355	167994	+	gene	unknown
YHR076W_intron	YHR076W	PTC7_i	chrVIII	251156	251248	+	gene	unknown
YDL125C_intron	YDL125C	HNT1_i	chrIV	239399	239509	-	gene	unknown
YBR078W_intron	YBR078W	ECM33_i	chrII	393181	393510	+	gene	unknown
YML036W_intron	YML036W	CGI121_i	chrXIII	206098	206203	+	gene	unknown
YLL067C_intron	YLL067C	YLL067C_i	chrXII	3916	4014	-	gene	unknown
YJL205C_intron	YJL205C	NCE101_i	chrX	50269	50411	-	gene	unknown
YOL047C_intron	YOL047C	LDS2_i	chrXV	242442	242504	-	gene	unknown
YBR119W_intron	YBR119W	MUD1_i	chrII	479346	479434	+	gene	unknown
YJR112W-A_intron	YJR112W-A	YJR112W-A_i	chrX	637810	637858	+	gene	unknown
YPR010C-A_intron	YPR010C-A	YPR010C-A_i	chrXVI	582559	582701	-	gene	unknown
YEL076C-A_intron	YEL076C-A	YEL076C-A_i	chrV	4323	4601	-	gene	unknown
YDR381C-A_intron	YDR381C-A	YDR381C-A_i	chrIV	1238631	1238824	-	gene	unknown
YKR095W-A_intron	YKR095W-A	PCC1_i	chrXI	625902	625976	+	gene	unknown
YMR194C-B_intron	YMR194C-B	CMC4_i	chrXIII	652776	652847	-	gene	unknown
YFR024C-A_intron	YFR024C-A	LSB3_i	chrVI	203293	203386	-	gene	unknown
YER074W-A_intron	YER074W-A	YOS1_i	chrV	307747	307848	+	gene	unknown
YER074W-A_intron	YER074W-A	YOS1_i	chrV	307957	308067	+	gene	unknown
YER093C-A_intron	YER093C-A	AIM11_i	chrV	348202	348276	-	gene	unknown
YER044C-A_intron	YER044C-A	MEI4_i	chrV	239624	239711	-	gene	unknown
YBL091C-A_intron	YBL091C-A	SCS22_i	chrII	47059	47146	-	gene	unknown
YHR079C-A_intron	YHR079C-A	SAE3_i	chrVIII	262355	262440	-	gene	unknown
YBL059C-A_intron	YBL059C-A	CMC2_i	chrII	110421	110505	-	gene	unknown
YLR287C-A_exon	YLR287C-A	RPS30A	chrXII	712315	712725	-	gene	noPTC
YLR287C-A_exon	YLR287C-A	RPS30A	chrXII	713156	713219	-	gene	noPTC
YPR170W-B_exon	YPR170W-B	YPR170W-B	chrXVI	883189	883387	+	gene	noPTC_enr
YPR170W-B_exon	YPR170W-B	YPR170W-B	chrXVI	883487	883695	+	gene	noPTC_enr
YKL180W_exon	YKL180W	RPL17A	chrXI	109199	109577	+	gene	noPTC
YKL180W_exon	YKL180W	RPL17A	chrXI	109884	110263	+	gene	noPTC
YBL050W_exon	YBL050W	SEC17	chrII	125052	125154	+	gene	noPTC
YBL050W_exon	YBL050W	SEC17	chrII	125271	126188	+	gene	noPTC
YER117W_exon	YER117W	RPL23B	chrV	396677	396810	+	gene	noPTC
YER117W_exon	YER117W	RPL23B	chrV	397282	397829	+	gene	noPTC
YDR025W_exon	YDR025W	RPS11A	chrIV	491465	491559	+	gene	noPTC
YDR025W_exon	YDR025W	RPS11A	chrIV	491899	492424	+	gene	noPTC
YHR021C_exon	YHR021C	RPS27B	chrVIII	147781	148116	-	gene	noPTC
YHR021C_exon	YHR021C	RPS27B	chrVIII	148667	148749	-	gene	noPTC
YIL052C_exon	YIL052C	RPL34B	chrIX	256039	256554	-	gene	noPTC
YIL052C_exon	YIL052C	RPL34B	chrIX	257027	257151	-	gene	noPTC
YJL136C_exon	YJL136C	RPS21B	chrX	156359	156789	-	gene	noPTC
YJL136C_exon	YJL136C	RPS21B	chrX	157250	157343	-	gene	noPTC
YJR145C_exon	YJR145C	RPS4A	chrX	701802	702798	-	gene	noPTC
YJR145C_exon	YJR145C	RPS4A	chrX	703055	703122	-	gene	noPTC
YOL127W_exon	YOL127W	RPL25	chrXV	80322	80360	+	gene	noPTC
YOL127W_exon	YOL127W	RPL25	chrXV	80775	81274	+	gene	noPTC
YDR500C_exon	YDR500C	RPL37B	chrIV	1450105	1450457	-	gene	noPTC
YDR500C_exon	YDR500C	RPL37B	chrIV	1450847	1450889	-	gene	noPTC
YDL191W_exon	YDL191W	RPL35A	chrIV	117616	117666	+	gene	noPTC
YDL191W_exon	YDL191W	RPL35A	chrIV	118158	118704	+	gene	noPTC
YML026C_exon	YML026C	RPS18B	chrXIII	222717	223380	-	gene	noPTC
YML026C_exon	YML026C	RPS18B	chrXIII	223782	223901	-	gene	noPTC
YGL030W_exon	YGL030W	RPL30	chrVII	438998	439093	+	gene	noPTC
YGL030W_exon	YGL030W	RPL30	chrVII	439324	439718	+	gene	noPTC
YGR214W_exon	YGR214W	RPS0A	chrVII	920550	920664	+	gene	noPTC
YGR214W_exon	YGR214W	RPS0A	chrVII	921120	921886	+	gene	noPTC
YLR406C_exon	YLR406C	RPL31B	chrXII	930717	931349	-	gene	noPTC
YLR406C_exon	YLR406C	RPL31B	chrXII	931699	931805	-	gene	noPTC
YDR471W_exon	YDR471W	RPL27B	chrIV	1401701	1401800	+	gene	noPTC
YDR471W_exon	YDR471W	RPL27B	chrIV	1402185	1402685	+	gene	noPTC
YKL006W_exon	YKL006W	RPL14A	chrXI	431753	432034	+	gene	noPTC
YKL006W_exon	YKL006W	RPL14A	chrXI	432433	432865	+	gene	noPTC
YNL301C_exon	YNL301C	RPL18B	chrXIV	63398	64018	-	gene	noPTC
YNL301C_exon	YNL301C	RPL18B	chrXIV	64451	64614	-	gene	noPTC
YKR094C_exon	YKR094C	RPL40B	chrXI	617816	618374	-	gene	noPTC
YKR094C_exon	YKR094C	RPL40B	chrXI	618743	618832	-	gene	noPTC
YCR031C_exon	YCR031C	RPS14A	chrIII	177394	177906	-	gene	noPTC
YCR031C_exon	YCR031C	RPS14A	chrIII	178214	178258	-	gene	noPTC
YGL103W_exon	YGL103W	RPL28	chrVII	310920	311015	+	gene	noPTC
YGL103W_exon	YGL103W	RPL28	chrVII	311527	312016	+	gene	noPTC
YMR116C_exon	YMR116C	ASC1	chrXIII	499356	499878	-	gene	noPTC
YMR116C_exon	YMR116C	ASC1	chrXIII	500152	500738	-	gene	noPTC
YOL120C_exon	YOL120C	RPL18A	chrXV	93278	93843	-	gene	noPTC
YOL120C_exon	YOL120C	RPL18A	chrXV	94291	94430	-	gene	noPTC
YNL302C_exon	YNL302C	RPS19B	chrXIV	61766	62372	-	gene	noPTC
YNL302C_exon	YNL302C	RPS19B	chrXIV	62924	63094	-	gene	noPTC
YOR096W_exon	YOR096W	RPS7A	chrXV	505737	505937	+	gene	noPTC
YOR096W_exon	YOR096W	RPS7A	chrXV	506339	506865	+	gene	noPTC
YBL087C_exon	YBL087C	RPL23A	chrII	59729	60193	-	gene	noPTC
YBL087C_exon	YBL087C	RPL23A	chrII	60698	60849	-	gene	noPTC
YDL082W_exon	YDL082W	RPL13A	chrIV	308369	308427	+	gene	noPTC
YDL082W_exon	YDL082W	RPL13A	chrIV	308793	309505	+	gene	noPTC
YOL121C_exon	YOL121C	RPS19A	chrXV	91942	92440	-	gene	noPTC
YOL121C_exon	YOL121C	RPS19A	chrXV	92831	92918	-	gene	noPTC
YNL096C_exon	YNL096C	RPS7B	chrXIV	443213	443826	-	gene	noPTC
YNL096C_exon	YNL096C	RPS7B	chrXIV	444172	444381	-	gene	noPTC
YLR048W_exon	YLR048W	RPS0B	chrXII	242144	242321	+	gene	noPTC
YLR048W_exon	YLR048W	RPS0B	chrXII	242681	243608	+	gene	noPTC
YPR043W_exon	YPR043W	RPL43A	chrXVI	654102	654167	+	gene	noPTC
YPR043W_exon	YPR043W	RPL43A	chrXVI	654571	654990	+	gene	noPTC
YFL039C_exon	YFL039C	ACT1	chrVI	53005	54377	-	gene	noPTC
YFL039C_exon	YFL039C	ACT1	chrVI	54687	54830	-	gene	noPTC
YOR293W_exon	YOR293W	RPS10A	chrXV	867044	867149	+	gene	noPTC
YOR293W_exon	YOR293W	RPS10A	chrXV	867587	867996	+	gene	noPTC
YIL018W_exon	YIL018W	RPL2B	chrIX	316707	316771	+	gene	noPTC
YIL018W_exon	YIL018W	RPL2B	chrIX	317172	318163	+	gene	noPTC
YMR230W_exon	YMR230W	RPS10B	chrXIII	732370	732465	+	gene	noPTC
YMR230W_exon	YMR230W	RPS10B	chrXIII	732876	733234	+	gene	noPTC
YBR181C_exon	YBR181C	RPS6B	chrII	591593	592416	-	gene	noPTC
YBR181C_exon	YBR181C	RPS6B	chrII	592769	592833	-	gene	noPTC
YDL083C_exon	YDL083C	RPS16B	chrIV	306669	307333	-	gene	noPTC
YDL083C_exon	YDL083C	RPS16B	chrIV	307766	307829	-	gene	noPTC
YGL076C_exon	YGL076C	RPL7A	chrVII	365433	365526	-	gene	noPTC
YGL076C_exon	YGL076C	RPL7A	chrVII	365986	366060	-	gene	noPTC
YOR234C_exon	YOR234C	RPL33B	chrXV	778541	778859	-	gene	noPTC
YOR234C_exon	YOR234C	RPL33B	chrXV	779387	779557	-	gene	noPTC
YGR034W_exon	YGR034W	RPL26B	chrVII	555735	555830	+	gene	noPTC
YGR034W_exon	YGR034W	RPL26B	chrVII	556308	556799	+	gene	noPTC
YHR141C_exon	YHR141C	RPL42B	chrVIII	381891	382306	-	gene	noPTC
YHR141C_exon	YHR141C	RPL42B	chrVIII	382748	382803	-	gene	noPTC
YML024W_exon	YML024W	RPS17A	chrXIII	225857	225891	+	gene	noPTC
YML024W_exon	YML024W	RPS17A	chrXIII	226290	226825	+	gene	noPTC
YML073C_exon	YML073C	RPL6A	chrXIII	123157	123742	-	gene	noPTC
YML073C_exon	YML073C	RPL6A	chrXIII	124158	124221	-	gene	noPTC
YKL157W_exon	YKL157W	APE2	chrXI	154959	155271	+	gene	noPTC
YKL157W_exon	YKL157W	APE2	chrXI	155655	158414	+	gene	noPTC
YPL198W_exon	YPL198W	RPL7B	chrXVI	173102	173162	+	gene	noPTC
YPL198W_exon	YPL198W	RPL7B	chrXVI	173572	173665	+	gene	noPTC
YPL198W_exon	YPL198W	RPL7B	chrXVI	174073	174802	+	gene	noPTC
YOR182C_exon	YOR182C	RPS30B	chrXV	677869	678379	-	gene	noPTC
YOR182C_exon	YOR182C	RPS30B	chrXV	678791	678845	-	gene	noPTC
YJL189W_exon	YJL189W	RPL39	chrX	75898	75938	+	gene	noPTC
YJL189W_exon	YJL189W	RPL39	chrX	76325	76610	+	gene	noPTC
YPR132W_exon	YPR132W	RPS23B	chrXVI	794935	795029	+	gene	noPTC
YPR132W_exon	YPR132W	RPS23B	chrXVI	795395	795943	+	gene	noPTC
YLR344W_exon	YLR344W	RPL26A	chrXII	819263	819330	+	gene	noPTC
YLR344W_exon	YLR344W	RPL26A	chrXII	819778	820415	+	gene	noPTC
YBR191W_exon	YBR191W	RPL21A	chrII	606220	606280	+	gene	noPTC
YBR191W_exon	YBR191W	RPL21A	chrII	606669	607240	+	gene	noPTC
YER074W_exon	YER074W	RPS24A	chrV	306269	306325	+	gene	noPTC
YER074W_exon	YER074W	RPS24A	chrV	306792	307309	+	gene	noPTC
YIL133C_exon	YIL133C	RPL16A	chrIX	98413	99095	-	gene	noPTC
YIL133C_exon	YIL133C	RPL16A	chrIX	99386	99453	-	gene	noPTC
YJL031C_exon	YJL031C	BET4	chrX	386241	387348	-	gene	noPTC
YJL031C_exon	YJL031C	BET4	chrX	387436	387537	-	gene	noPTC
YDR447C_exon	YDR447C	RPS17B	chrIV	1354777	1355236	-	gene	noPTC
YDR447C_exon	YDR447C	RPS17B	chrIV	1355551	1355609	-	gene	noPTC
YDR450W_exon	YDR450W	RPS18A	chrIV	1359893	1359969	+	gene	noPTC
YDR450W_exon	YDR450W	RPS18A	chrIV	1360405	1360909	+	gene	noPTC
YGR118W_exon	YGR118W	RPS23A	chrVII	726919	727038	+	gene	noPTC
YGR118W_exon	YGR118W	RPS23A	chrVII	727358	727998	+	gene	noPTC
YHR203C_exon	YHR203C	RPS4B	chrVIII	504352	505247	-	gene	noPTC
YHR203C_exon	YHR203C	RPS4B	chrVIII	505517	505648	-	gene	noPTC
YIL148W_exon	YIL148W	RPL40A	chrIX	68433	68715	+	gene	noPTC
YIL148W_exon	YIL148W	RPL40A	chrIX	69150	69601	+	gene	noPTC
YMR143W_exon	YMR143W	RPS16A	chrXIII	551802	551951	+	gene	noPTC
YMR143W_exon	YMR143W	RPS16A	chrXIII	552496	553066	+	gene	noPTC
YBR189W_exon	YBR189W	RPS9B	chrII	604469	604514	+	gene	noPTC
YBR189W_exon	YBR189W	RPS9B	chrII	604928	605573	+	gene	noPTC
YPL079W_exon	YPL079W	RPL21B	chrXVI	406606	406646	+	gene	noPTC
YPL079W_exon	YPL079W	RPL21B	chrXVI	407068	407646	+	gene	noPTC
YDL136W_exon	YDL136W	RPL35B	chrIV	217529	217602	+	gene	noPTC
YDL136W_exon	YDL136W	RPL35B	chrIV	218008	218497	+	gene	noPTC
YBR048W_exon	YBR048W	RPS11B	chrII	332738	332875	+	gene	noPTC
YBR048W_exon	YBR048W	RPS11B	chrII	333387	334042	+	gene	noPTC
YNL069C_exon	YNL069C	RPL16B	chrXIV	493726	494524	-	gene	noPTC
YNL069C_exon	YNL069C	RPL16B	chrXIV	494974	495046	-	gene	noPTC
YBL027W_exon	YBL027W	RPL19B	chrII	168372	168424	+	gene	noPTC
YBL027W_exon	YBL027W	RPL19B	chrII	168809	169508	+	gene	noPTC
YDL075W_exon	YDL075W	RPL31A	chrIV	322193	322282	+	gene	noPTC
YDL075W_exon	YDL075W	RPL31A	chrIV	322704	323041	+	gene	noPTC
YGL076C_exon	YGL076C	RPL7A	chrVII	364964	365436	-	gene	noPTC
YLR448W_exon	YLR448W	RPL6B	chrXII	1028780	1028868	+	gene	noPTC_enr
YLR448W_exon	YLR448W	RPL6B	chrXII	1029253	1030052	+	gene	noPTC_enr
YHR101C_exon	YHR101C	BIG1	chrVIII	314786	315771	-	gene	noPTC_enr
YHR101C_exon	YHR101C	BIG1	chrVIII	315859	315994	-	gene	noPTC_enr
YPL081W_exon	YPL081W	RPS9A	chrXVI	404910	404956	+	gene	noPTC_enr
YPL081W_exon	YPL081W	RPS9A	chrXVI	405458	406222	+	gene	noPTC_enr
YKR057W_exon	YKR057W	RPS21A	chrXI	551610	551680	+	gene	noPTC_enr
YKR057W_exon	YKR057W	RPS21A	chrXI	552003	552506	+	gene	noPTC_enr
YDL029W_exon	YDL029W	ARP2	chrIV	399300	399361	+	gene	noPTC_enr
YDL029W_exon	YDL029W	ARP2	chrIV	399485	400900	+	gene	noPTC_enr
YHL001W_exon	YHL001W	RPL14B	chrVIII	104223	104405	+	gene	noPTC_enr
YHL001W_exon	YHL001W	RPL14B	chrVIII	104804	105223	+	gene	noPTC_enr
YLL050C_exon	YLL050C	COF1	chrXII	39686	40221	-	gene	noPTC_enr
YLL050C_exon	YLL050C	COF1	chrXII	40401	40438	-	gene	noPTC_enr
YKL156W_exon	YKL156W	RPS27A	chrXI	158566	158615	+	gene	noPTC_enr
YKL156W_exon	YKL156W	RPS27A	chrXI	158967	159383	+	gene	noPTC_enr
YCL005W-A_exon	YCL005W-A	VMA9	chrIII	106962	107033	+	gene	noPTC
YJR094W-A_exon	YJR094W-A	RPL43B	chrX	608196	608306	+	gene	noPTC
YJR094W-A_exon	YJR094W-A	RPL43B	chrX	608582	608996	+	gene	noPTC
YPL249C-A_exon	YPL249C-A	RPL36B	chrXVI	75541	75985	-	gene	noPTC
YPL249C-A_exon	YPL249C-A	RPL36B	chrXVI	76224	76373	-	gene	noPTC
YKL006C-A_exon	YKL006C-A	SFT1	chrXI	429973	430455	-	gene	noPTC
YKL006C-A_exon	YKL006C-A	SFT1	chrXI	430597	430653	-	gene	noPTC
YFR031C-A_exon	YFR031C-A	RPL2A	chrVI	220377	221267	-	gene	noPTC
YFR031C-A_exon	YFR031C-A	RPL2A	chrVI	221415	221473	-	gene	noPTC
YHR001W-A_exon	YHR001W-A	QCR10	chrVIII	107759	107831	+	gene	noPTC
YHR001W-A_exon	YHR001W-A	QCR10	chrVIII	107895	108439	+	gene	noPTC
YIL156W-B_exon	YIL156W-B	YIL156W-B	chrIX	47640	47698	+	gene	noPTC
YIL156W-B_exon	YIL156W-B	YIL156W-B	chrIX	47761	48073	+	gene	noPTC
YER056C-A_exon	YER056C-A	RPL34A	chrV	269295	269751	-	gene	noPTC
YER056C-A_exon	YER056C-A	RPL34A	chrV	270149	270223	-	gene	noPTC
YBR084C-A_exon	YBR084C-A	RPL19A	chrII	414089	414753	-	gene	noPTC
YBR084C-A_exon	YBR084C-A	RPL19A	chrII	415260	415305	-	gene	noPTC
YGL226C-A_exon	YGL226C-A	OST5	chrVII	72630	72988	-	gene	noPTC
YGL226C-A_exon	YGL226C-A	OST5	chrVII	73138	73215	-	gene	noPTC
YFL034C-B_exon	YFL034C-B	MOB2	chrVI	62846	63859	-	gene	noPTC
YFL034C-B_exon	YFL034C-B	MOB2	chrVI	63974	64054	-	gene	noPTC
YHR039C-A_exon	YHR039C-A	VMA10	chrVIII	187069	187514	-	gene	noPTC
YHR039C-A_exon	YHR039C-A	VMA10	chrVIII	187677	187709	-	gene	noPTC
YCR028C-A_exon	YCR028C-A	RIM1	chrIII	172746	173115	-	gene	noPTC_enr
YCR028C-A_exon	YCR028C-A	RIM1	chrIII	173199	173522	-	gene	noPTC_enr
YBR255C-A_exon	YBR255C-A	RCF3	chrII	726521	726917	-	gene	noPTC_enr
YBR255C-A_exon	YBR255C-A	RCF3	chrII	727012	727113	-	gene	noPTC_enr
YER007C-A_exon	YER007C-A	TMA20	chrV	165966	166771	-	gene	noPTC_enr
YER007C-A_exon	YER007C-A	TMA20	chrV	166875	166926	-	gene	noPTC_enr
YFL034C-A_exon	YFL034C-A	RPL22B	chrVI	64174	64599	-	gene	noPTC_enr
YFL034C-A_exon	YFL034C-A	RPL22B	chrVI	64921	64990	-	gene	noPTC_enr
snR17a_intron	snR17a_intron	snR17a_intron_i	chrXV	780121	780277	+	snoRNA	ncRNA
snR17b_intron	snR17b_intron	snR17b_intron_i	chrXVI	281374	281503	-	snoRNA	ncRNA
YMR142C_exon	YMR142C	RPL13B	chrXIII	550110	550801	-	gene	noPTC
YMR142C_exon	YMR142C	RPL13B	chrXIII	551204	551246	-	gene	noPTC
YDR064W_exon	YDR064W	RPS13	chrIV	579421	579478	+	gene	noPTC
YDR064W_exon	YDR064W	RPS13	chrIV	580018	580541	+	gene	noPTC
YJL177W_exon	YJL177W	RPL17B	chrX	90635	91094	+	gene	noPTC
YJL177W_exon	YJL177W	RPL17B	chrX	91412	91835	+	gene	noPTC
YHR010W_exon	YHR010W	RPL27A	chrVIII	126472	126551	+	gene	noPTC
YHR010W_exon	YHR010W	RPL27A	chrVIII	127113	127616	+	gene	noPTC
YCL005W-A_exon	YCL005W-A	VMA9	chrIII	107111	107191	+	gene	noPTC
YCL005W-A_exon	YCL005W-A	VMA9	chrIII	107288	107530	+	gene	noPTC
YPL143W_exon	YPL143W	RPL33A	chrXVI	282066	282140	+	gene	noPTC
YPL143W_exon	YPL143W	RPL33A	chrXVI	282666	283114	+	gene	noPTC
YHR199C-A_exon	YHR199C-A	NBL1	chrVIII	498471	498719	-	gene	PTC
YHR199C-A_exon	YHR199C-A	NBL1	chrVIII	498787	498909	-	gene	PTC
YER044C-A_exon	YER044C-A	MEI4	chrV	238142	239623	-	gene	PTC
YER044C-A_exon	YER044C-A	MEI4	chrV	239406	239712	-	gene	PTC
YLR078C_exon	YLR078C	BOS1	chrXII	285660	286467	-	gene	PTC_pos
YLR078C_exon	YLR078C	BOS1	chrXII	286557	286644	-	gene	PTC_pos
YIL111W_exon	YIL111W	COX5B	chrIX	155148	155222	+	gene	PTC_pos
YIL111W_exon	YIL111W	COX5B	chrIX	155311	155852	+	gene	PTC_pos
YJR112W-A_exon	YJR112W-A	YJR112W-A	chrX	637782	637809	+	gene	PTC_pos
YJR112W-A_exon	YJR112W-A	YJR112W-A	chrX	637859	638270	+	gene	PTC_pos
YPR010C-A_exon	YPR010C-A	YPR010C-A	chrXVI	582170	582558	-	gene	PTC_pos
YPR010C-A_exon	YPR010C-A	YPR010C-A	chrXVI	582702	582818	-	gene	PTC_pos
YIL004C_exon	YIL004C	BET1	chrIX	347768	348363	-	gene	PTC_pos
YIL004C_exon	YIL004C	BET1	chrIX	348495	348568	-	gene	PTC_pos
YJL191W_exon	YJL191W	RPS14B	chrX	73754	73796	+	gene	PTC_pos
YJL191W_exon	YJL191W	RPS14B	chrX	74205	74746	+	gene	PTC_pos
YMR242C_exon	YMR242C	RPL20A	chrXIII	753118	753742	-	gene	PTC_pos
YMR242C_exon	YMR242C	RPL20A	chrXIII	754220	754310	-	gene	PTC_pos
YNL138W-A_exon	YNL138W-A	YSF3	chrXIV	366001	366035	+	gene	PTC_pos
YNL138W-A_exon	YNL138W-A	YSF3	chrXIV	366158	366545	+	gene	PTC_pos
YDR381C-A_exon	YDR381C-A	YDR381C-A	chrIV	1238145	1238630	-	gene	PTC_pos
YDR381C-A_exon	YDR381C-A	YDR381C-A	chrIV	1238825	1239129	-	gene	PTC_pos
YPL090C_exon	YPL090C	RPS6A	chrXVI	377138	377995	-	gene	PTC_pos
YPL090C_exon	YPL090C	RPS6A	chrXVI	378390	378474	-	gene	PTC_pos
YKR095W-A_exon	YKR095W-A	PCC1	chrXI	625820	625901	+	gene	PTC_pos
YKR095W-A_exon	YKR095W-A	PCC1	chrXI	625977	626348	+	gene	PTC_pos
YNL162W_exon	YNL162W	RPL42A	chrXIV	331289	331325	+	gene	PTC_pos
YNL162W_exon	YNL162W	RPL42A	chrXIV	331838	332249	+	gene	PTC_pos
YLR185W_exon	YLR185W	RPL37A	chrXII	522591	522669	+	gene	PTC_pos
YLR185W_exon	YLR185W	RPL37A	chrXII	523029	523399	+	gene	PTC_pos
YPL241C_exon	YPL241C	CIN2	chrXVI	95261	96153	-	gene	PTC_pos
YPL241C_exon	YPL241C	CIN2	chrXVI	96234	96293	-	gene	PTC_pos
YOR312C_exon	YOR312C	RPL20B	chrXV	900186	900767	-	gene	PTC_pos
YOR312C_exon	YOR312C	RPL20B	chrXV	901194	901274	-	gene	PTC_pos
YMR194W_exon	YMR194W	RPL36A	chrXIII	651114	651160	+	gene	PTC_pos
YMR194W_exon	YMR194W	RPL36A	chrXIII	651624	652010	+	gene	PTC_pos
YMR194C-B_exon	YMR194C-B	CMC4	chrXIII	652494	652775	-	gene	PTC_pos
YMR194C-B_exon	YMR194C-B	CMC4	chrXIII	652848	652937	-	gene	PTC_pos
YBR111W-A_exon	YBR111W-A	SUS1	chrII	462110	462209	+	gene	PTC_pos
YBR111W-A_exon	YBR111W-A	SUS1	chrII	462290	462429	+	gene	PTC_pos
YBR111W-A_exon	YBR111W-A	SUS1	chrII	462500	462726	+	gene	PTC_pos
YFR024C-A_exon	YFR024C-A	LSB3	chrVI	201721	203292	-	gene	PTC_pos
YFR024C-A_exon	YFR024C-A	LSB3	chrVI	203387	203465	-	gene	PTC_pos
YKL190W_exon	YKL190W	CNB1	chrXI	82911	82998	+	gene	PTC_pos
YKL190W_exon	YKL190W	CNB1	chrXI	83075	83903	+	gene	PTC_pos
YER074W-A_exon	YER074W-A	YOS1	chrV	307597	307746	+	gene	PTC_pos
YER074W-A_exon	YER074W-A	YOS1	chrV	307849	307956	+	gene	PTC_pos
YER074W-A_exon	YER074W-A	YOS1	chrV	308068	308173	+	gene	PTC_pos
YER093C-A_exon	YER093C-A	AIM11	chrV	347833	348201	-	gene	PTC_pos
YER093C-A_exon	YER093C-A	AIM11	chrV	348277	348409	-	gene	PTC_pos
YBL091C-A_exon	YBL091C-A	SCS22	chrII	46528	47058	-	gene	PTC_pos
YBL091C-A_exon	YBL091C-A	SCS22	chrII	47147	47176	-	gene	PTC_pos
YMR033W_exon	YMR033W	ARP9	chrXIII	337754	337817	+	gene	PTC_pos
YMR033W_exon	YMR033W	ARP9	chrXIII	337904	339418	+	gene	PTC_pos
YLR211C_exon	YLR211C	ATG38	chrXII	563387	564454	-	gene	PTC_pos
YLR211C_exon	YLR211C	ATG38	chrXII	564514	564587	-	gene	PTC_pos
YIL069C_exon	YIL069C	RPS24B	chrIX	231344	231957	-	gene	PTC_pos
YIL069C_exon	YIL069C	RPS24B	chrIX	232367	232464	-	gene	PTC_pos
YLR367W_exon	YLR367W	RPS22B	chrXII	855828	856574	+	gene	PTC_pos
YLR367W_exon	YLR367W	RPS22B	chrXII	857058	857417	+	gene	PTC_pos
YML036W_exon	YML036W	CGI121	chrXIII	205609	206097	+	gene	PTC_pos
YML036W_exon	YML036W	CGI121	chrXIII	206204	206289	+	gene	PTC_pos
YBL059C-A_exon	YBL059C-A	CMC2	chrII	109961	110420	-	gene	PTC_pos
YBL059C-A_exon	YBL059C-A	CMC2	chrII	110506	110569	-	gene	PTC_pos
YJL024C_exon	YJL024C	APS3	chrX	395577	396493	-	gene	PTC_pos
YJL024C_exon	YJL024C	APS3	chrX	396571	396633	-	gene	PTC_pos
YER014C-A_exon	YER014C-A	BUD25	chrV	183631	184169	-	gene	PTC_pos
YER014C-A_exon	YER014C-A	BUD25	chrV	184678	184750	-	gene	PTC_pos
YEL076C-A_exon	YEL076C-A	YEL076C-A	chrV	4085	4322	-	gene	unknown
YEL076C-A_exon	YEL076C-A	YEL076C-A	chrV	4602	5164	-	gene	unknown
YLR061W_exon	YLR061W	RPL22A	chrXII	263136	263205	+	gene	unknown
YLR061W_exon	YLR061W	RPL22A	chrXII	263595	264064	+	gene	unknown
YHR079C-A_exon	YHR079C-A	SAE3	chrVIII	262092	262354	-	gene	unknown
YHR079C-A_exon	YHR079C-A	SAE3	chrVIII	262441	262603	-	gene	unknown
YGR225W_exon	YGR225W	AMA1	chrVII	945040	946327	+	gene	unknown
YGR225W_exon	YGR225W	AMA1	chrVII	946421	947073	+	gene	unknown
CUT_GIM_0706	CUT_GIM_0706	CUT_GIM_0706	chrIX	254929	255110	+	CUT_GIM_RNA	CUT
CUT_GIM_0752	CUT_GIM_0752	CUT_GIM_0752	chrXII	417232	417711	+	CUT_GIM_RNA	CUT
CUT_GIM_0091	CUT_GIM_0091	CUT_GIM_0091	chrII	682239	682679	+	CUT_GIM_RNA	CUT
CUT_GIM_0559	CUT_GIM_0559	CUT_GIM_0559	chrVII	993733	994550	-	CUT_GIM_RNA	CUT
CUT_GIM_0264	CUT_GIM_0264	CUT_GIM_0264	chrXVI	335936	336134	+	CUT_GIM_RNA	CUT
CUT_GIM_0930	CUT_GIM_0930	CUT_GIM_0930	chrXIII	646579	646787	-	CUT_GIM_RNA	CUT
CUT_GIM_0661	CUT_GIM_0661	CUT_GIM_0661	chrXV	784273	784645	-	CUT_GIM_RNA	CUT
CUT_GIM_0949	CUT_GIM_0949	CUT_GIM_0949	chrXIII	513254	513349	-	CUT_GIM_RNA	CUT
CUT_GIM_0526	CUT_GIM_0526	CUT_GIM_0526	chrVII	426641	426916	-	CUT_GIM_RNA	CUT
CUT_GIM_0791	CUT_GIM_0791	CUT_GIM_0791	chrXII	805378	805586	+	CUT_GIM_RNA	CUT
CUT_GIM_1260	CUT_GIM_1260	CUT_GIM_1260	chrVIII	167651	168081	+	CUT_GIM_RNA	CUT
CUT_GIM_0493	CUT_GIM_0493	CUT_GIM_0493	chrVII	794616	794966	+	CUT_GIM_RNA	CUT
CUT_GIM_0876	CUT_GIM_0876	CUT_GIM_0876	chrXIII	220097	220562	+	CUT_GIM_RNA	CUT
CUT_GIM_0223	CUT_GIM_0223	CUT_GIM_0223	chrXIV	217047	217114	-	CUT_GIM_RNA	CUT
CUT_GIM_0423	CUT_GIM_0423	CUT_GIM_0423	chrXI	556335	557290	-	CUT_GIM_RNA	CUT
CUT_GIM_0102	CUT_GIM_0102	CUT_GIM_0102	chrII	191979	192476	+	CUT_GIM_RNA	CUT
CUT_GIM_0756	CUT_GIM_0756	CUT_GIM_0756	chrXII	1028136	1028359	+	CUT_GIM_RNA	CUT
CUT_GIM_0354	CUT_GIM_0354	CUT_GIM_0354	chrXVI	694749	695009	-	CUT_GIM_RNA	CUT
CUT_GIM_1030	CUT_GIM_1030	CUT_GIM_1030	chrX	119496	120549	+	CUT_GIM_RNA	CUT
CUT_GIM_0037	CUT_GIM_0037	CUT_GIM_0037	chrV	321679	321887	-	CUT_GIM_RNA	CUT
CUT_GIM_0120	CUT_GIM_0120	CUT_GIM_0120	chrII	343945	344182	-	CUT_GIM_RNA	CUT
CUT_GIM_0784	CUT_GIM_0784	CUT_GIM_0784	chrXII	449738	450119	+	CUT_GIM_RNA	CUT
CUT_GIM_0657	CUT_GIM_0657	CUT_GIM_0657	chrXV	803863	804227	-	CUT_GIM_RNA	CUT
CUT_GIM_1301	CUT_GIM_1301	CUT_GIM_1301	chrVIII	220876	221268	-	CUT_GIM_RNA	CUT
CUT_GIM_0227	CUT_GIM_0227	CUT_GIM_0227	chrXIV	708003	708248	-	CUT_GIM_RNA	CUT
CUT_GIM_1206	CUT_GIM_1206	CUT_GIM_1206	chrIV	1011027	1011373	-	CUT_GIM_RNA	CUT
CUT_GIM_0344	CUT_GIM_0344	CUT_GIM_0344	chrXVI	644941	644987	-	CUT_GIM_RNA	CUT
CUT_GIM_0008	CUT_GIM_0008	CUT_GIM_0008	chrV	322186	322721	+	CUT_GIM_RNA	CUT
CUT_GIM_1138	CUT_GIM_1138	CUT_GIM_1138	chrIV	1238343	1239085	+	CUT_GIM_RNA	CUT
CUT_GIM_1107	CUT_GIM_1107	CUT_GIM_1107	chrIV	367012	367267	+	CUT_GIM_RNA	CUT
CUT_GIM_0034	CUT_GIM_0034	CUT_GIM_0034	chrV	549380	549549	-	CUT_GIM_RNA	CUT
CUT_GIM_0698	CUT_GIM_0698	CUT_GIM_0698	chrXV	380137	380737	-	CUT_GIM_RNA	CUT
CUT_GIM_1069	CUT_GIM_1069	CUT_GIM_1069	chrX	477664	478148	-	CUT_GIM_RNA	CUT
CUT_GIM_0723	CUT_GIM_0723	CUT_GIM_0723	chrIX	28720	28894	+	CUT_GIM_RNA	CUT
CUT_GIM_0400	CUT_GIM_0400	CUT_GIM_0400	chrXI	578495	578516	+	CUT_GIM_RNA	CUT
CUT_GIM_0708	CUT_GIM_0708	CUT_GIM_0708	chrIX	425435	425745	+	CUT_GIM_RNA	CUT
CUT_GIM_1088	CUT_GIM_1088	CUT_GIM_1088	chrX	535031	535704	-	CUT_GIM_RNA	CUT
CUT_GIM_0262	CUT_GIM_0262	CUT_GIM_0262	chrXVI	451568	452226	+	CUT_GIM_RNA	CUT
CUT_GIM_1264	CUT_GIM_1264	CUT_GIM_1264	chrVIII	18723	18976	+	CUT_GIM_RNA	CUT
CUT_GIM_1066	CUT_GIM_1066	CUT_GIM_1066	chrX	496949	497182	-	CUT_GIM_RNA	CUT
CUT_GIM_0304	CUT_GIM_0304	CUT_GIM_0304	chrXVI	169700	170096	+	CUT_GIM_RNA	CUT
CUT_GIM_0345	CUT_GIM_0345	CUT_GIM_0345	chrXVI	927137	927766	-	CUT_GIM_RNA	CUT
CUT_GIM_0785	CUT_GIM_0785	CUT_GIM_0785	chrXII	1041729	1042248	+	CUT_GIM_RNA	CUT
CUT_GIM_0318	CUT_GIM_0318	CUT_GIM_0318	chrXVI	34829	34996	-	CUT_GIM_RNA	CUT
CUT_GIM_0528	CUT_GIM_0528	CUT_GIM_0528	chrVII	412437	413140	-	CUT_GIM_RNA	CUT
CUT_GIM_0194	CUT_GIM_0194	CUT_GIM_0194	chrXIV	217748	218291	+	CUT_GIM_RNA	CUT
CUT_GIM_0031	CUT_GIM_0031	CUT_GIM_0031	chrV	270644	270969	+	CUT_GIM_RNA	CUT
CUT_GIM_1218	CUT_GIM_1218	CUT_GIM_1218	chrIV	562577	562860	-	CUT_GIM_RNA	CUT
CUT_GIM_0839	CUT_GIM_0839	CUT_GIM_0839	chrXII	855362	855592	-	CUT_GIM_RNA	CUT
CUT_GIM_0881	CUT_GIM_0881	CUT_GIM_0881	chrXIII	478959	479665	+	CUT_GIM_RNA	CUT
CUT_GIM_1259	CUT_GIM_1259	CUT_GIM_1259	chrVIII	117180	117904	+	CUT_GIM_RNA	CUT
CUT_GIM_0967	CUT_GIM_0967	CUT_GIM_0967	chrIII	39039	39361	+	CUT_GIM_RNA	CUT
CUT_GIM_0178	CUT_GIM_0178	CUT_GIM_0178	chrXIV	736319	736534	+	CUT_GIM_RNA	CUT
CUT_GIM_0893	CUT_GIM_0893	CUT_GIM_0893	chrXIII	349816	350678	+	CUT_GIM_RNA	CUT
CUT_GIM_1100	CUT_GIM_1100	CUT_GIM_1100	chrIV	892756	892946	+	CUT_GIM_RNA	CUT
CUT_GIM_1161	CUT_GIM_1161	CUT_GIM_1161	chrIV	557014	557180	+	CUT_GIM_RNA	CUT
CUT_GIM_0351	CUT_GIM_0351	CUT_GIM_0351	chrXVI	107858	108252	-	CUT_GIM_RNA	CUT
CUT_GIM_0928	CUT_GIM_0928	CUT_GIM_0928	chrXIII	217009	217087	-	CUT_GIM_RNA	CUT
CUT_GIM_0988	CUT_GIM_0988	CUT_GIM_0988	chrIII	310585	310725	-	CUT_GIM_RNA	CUT
CUT_GIM_0337	CUT_GIM_0337	CUT_GIM_0337	chrXVI	491440	491733	-	CUT_GIM_RNA	CUT
CUT_GIM_0695	CUT_GIM_0695	CUT_GIM_0695	chrXV	848994	849435	-	CUT_GIM_RNA	CUT
CUT_GIM_0871	CUT_GIM_0871	CUT_GIM_0871	chrXIII	557477	557705	+	CUT_GIM_RNA	CUT
CUT_GIM_1118	CUT_GIM_1118	CUT_GIM_1118	chrIV	1011582	1011699	+	CUT_GIM_RNA	CUT
CUT_GIM_1076	CUT_GIM_1076	CUT_GIM_1076	chrX	651086	651263	-	CUT_GIM_RNA	CUT
CUT_GIM_0093	CUT_GIM_0093	CUT_GIM_0093	chrII	342001	342198	+	CUT_GIM_RNA	CUT
CUT_GIM_0868	CUT_GIM_0868	CUT_GIM_0868	chrXIII	478959	479190	+	CUT_GIM_RNA	CUT
CUT_GIM_0228	CUT_GIM_0228	CUT_GIM_0228	chrXIV	651684	651818	-	CUT_GIM_RNA	CUT
CUT_GIM_0908	CUT_GIM_0908	CUT_GIM_0908	chrXIII	110468	110850	-	CUT_GIM_RNA	CUT
CUT_GIM_0836	CUT_GIM_0836	CUT_GIM_0836	chrXII	254910	254980	-	CUT_GIM_RNA	CUT
CUT_GIM_1205	CUT_GIM_1205	CUT_GIM_1205	chrIV	657208	658146	-	CUT_GIM_RNA	CUT
CUT_GIM_0900	CUT_GIM_0900	CUT_GIM_0900	chrXIII	758439	758768	+	CUT_GIM_RNA	CUT
CUT_GIM_0187	CUT_GIM_0187	CUT_GIM_0187	chrXIV	42276	42530	+	CUT_GIM_RNA	CUT
CUT_GIM_1104	CUT_GIM_1104	CUT_GIM_1104	chrIV	138049	138397	+	CUT_GIM_RNA	CUT
CUT_GIM_0841	CUT_GIM_0841	CUT_GIM_0841	chrXII	657066	657973	-	CUT_GIM_RNA	CUT
CUT_GIM_0534	CUT_GIM_0534	CUT_GIM_0534	chrVII	746524	746554	-	CUT_GIM_RNA	CUT
CUT_GIM_1098	CUT_GIM_1098	CUT_GIM_1098	chrIV	68985	69165	+	CUT_GIM_RNA	CUT
CUT_GIM_0147	CUT_GIM_0147	CUT_GIM_0147	chrII	532966	533192	-	CUT_GIM_RNA	CUT
CUT_GIM_0532	CUT_GIM_0532	CUT_GIM_0532	chrVII	337306	337620	-	CUT_GIM_RNA	CUT
CUT_GIM_0812	CUT_GIM_0812	CUT_GIM_0812	chrXII	448031	448252	+	CUT_GIM_RNA	CUT
CUT_GIM_0309	CUT_GIM_0309	CUT_GIM_0309	chrXVI	425830	426104	+	CUT_GIM_RNA	CUT
CUT_GIM_1102	CUT_GIM_1102	CUT_GIM_1102	chrIV	300346	300564	+	CUT_GIM_RNA	CUT
CUT_GIM_0656	CUT_GIM_0656	CUT_GIM_0656	chrXV	1010185	1010844	-	CUT_GIM_RNA	CUT
CUT_GIM_0043	CUT_GIM_0043	CUT_GIM_0043	chrV	300964	301408	-	CUT_GIM_RNA	CUT
CUT_GIM_0937	CUT_GIM_0937	CUT_GIM_0937	chrXIII	25801	26014	-	CUT_GIM_RNA	CUT
CUT_GIM_1132	CUT_GIM_1132	CUT_GIM_1132	chrIV	1496793	1497114	+	CUT_GIM_RNA	CUT
CUT_GIM_1131	CUT_GIM_1131	CUT_GIM_1131	chrIV	592326	593232	+	CUT_GIM_RNA	CUT
CUT_GIM_0996	CUT_GIM_0996	CUT_GIM_0996	chrX	151014	151192	+	CUT_GIM_RNA	CUT
CUT_GIM_0875	CUT_GIM_0875	CUT_GIM_0875	chrXIII	42031	42513	+	CUT_GIM_RNA	CUT
CUT_GIM_0373	CUT_GIM_0373	CUT_GIM_0373	chrXVI	801528	801953	-	CUT_GIM_RNA	CUT
CUT_GIM_1173	CUT_GIM_1173	CUT_GIM_1173	chrIV	784448	784691	-	CUT_GIM_RNA	CUT
CUT_GIM_0312	CUT_GIM_0312	CUT_GIM_0312	chrXVI	226038	226197	+	CUT_GIM_RNA	CUT
CUT_GIM_0786	CUT_GIM_0786	CUT_GIM_0786	chrXII	410499	410825	+	CUT_GIM_RNA	CUT
CUT_GIM_0001	CUT_GIM_0001	CUT_GIM_0001	chrV	484528	484744	+	CUT_GIM_RNA	CUT
CUT_GIM_1238	CUT_GIM_1238	CUT_GIM_1238	chrIV	407534	407640	-	CUT_GIM_RNA	CUT
CUT_GIM_0793	CUT_GIM_0793	CUT_GIM_0793	chrXII	185099	185174	+	CUT_GIM_RNA	CUT
CUT_GIM_0305	CUT_GIM_0305	CUT_GIM_0305	chrXVI	432380	432626	+	CUT_GIM_RNA	CUT
CUT_GIM_0440	CUT_GIM_0440	CUT_GIM_0440	chrVII	1059088	1059848	+	CUT_GIM_RNA	CUT
CUT_GIM_1039	CUT_GIM_1039	CUT_GIM_1039	chrX	335826	335864	+	CUT_GIM_RNA	CUT
CUT_GIM_1294	CUT_GIM_1294	CUT_GIM_1294	chrVIII	441639	441910	-	CUT_GIM_RNA	CUT
CUT_GIM_0116	CUT_GIM_0116	CUT_GIM_0116	chrII	379131	379391	+	CUT_GIM_RNA	CUT
CUT_GIM_0195	CUT_GIM_0195	CUT_GIM_0195	chrXIV	499690	500663	+	CUT_GIM_RNA	CUT
CUT_GIM_1291	CUT_GIM_1291	CUT_GIM_1291	chrVIII	49949	50553	-	CUT_GIM_RNA	CUT
CUT_GIM_0136	CUT_GIM_0136	CUT_GIM_0136	chrII	740677	741100	-	CUT_GIM_RNA	CUT
CUT_GIM_0953	CUT_GIM_0953	CUT_GIM_0953	chrXIII	43606	43822	-	CUT_GIM_RNA	CUT
CUT_GIM_0885	CUT_GIM_0885	CUT_GIM_0885	chrXIII	749914	750022	+	CUT_GIM_RNA	CUT
CUT_GIM_0293	CUT_GIM_0293	CUT_GIM_0293	chrXVI	583764	584537	+	CUT_GIM_RNA	CUT
CUT_GIM_1216	CUT_GIM_1216	CUT_GIM_1216	chrIV	473478	473877	-	CUT_GIM_RNA	CUT
CUT_GIM_0121	CUT_GIM_0121	CUT_GIM_0121	chrII	549146	549532	-	CUT_GIM_RNA	CUT
CUT_GIM_0171	CUT_GIM_0171	CUT_GIM_0171	chrVI	263554	263791	-	CUT_GIM_RNA	CUT
CUT_GIM_1171	CUT_GIM_1171	CUT_GIM_1171	chrIV	1054766	1054937	-	CUT_GIM_RNA	CUT
CUT_GIM_0388	CUT_GIM_0388	CUT_GIM_0388	chrXI	178406	178602	+	CUT_GIM_RNA	CUT
CUT_GIM_0765	CUT_GIM_0765	CUT_GIM_0765	chrXII	320396	320559	+	CUT_GIM_RNA	CUT
CUT_GIM_0682	CUT_GIM_0682	CUT_GIM_0682	chrXV	748866	749082	-	CUT_GIM_RNA	CUT
CUT_GIM_1200	CUT_GIM_1200	CUT_GIM_1200	chrIV	215426	215741	-	CUT_GIM_RNA	CUT
CUT_GIM_0460	CUT_GIM_0460	CUT_GIM_0460	chrVII	654370	654666	+	CUT_GIM_RNA	CUT
CUT_GIM_0044	CUT_GIM_0044	CUT_GIM_0044	chrV	302342	302487	-	CUT_GIM_RNA	CUT
CUT_GIM_1263	CUT_GIM_1263	CUT_GIM_1263	chrVIII	549499	550173	+	CUT_GIM_RNA	CUT
CUT_GIM_1310	CUT_GIM_1310	CUT_GIM_1310	chrVIII	281085	281248	-	CUT_GIM_RNA	CUT
CUT_GIM_1220	CUT_GIM_1220	CUT_GIM_1220	chrIV	428444	428714	-	CUT_GIM_RNA	CUT
CUT_GIM_0279	CUT_GIM_0279	CUT_GIM_0279	chrXVI	882965	883369	+	CUT_GIM_RNA	CUT
CUT_GIM_1029	CUT_GIM_1029	CUT_GIM_1029	chrX	486535	486754	+	CUT_GIM_RNA	CUT
CUT_GIM_1086	CUT_GIM_1086	CUT_GIM_1086	chrX	122864	123007	-	CUT_GIM_RNA	CUT
CUT_GIM_0866	CUT_GIM_0866	CUT_GIM_0866	chrXIII	317070	317955	+	CUT_GIM_RNA	CUT
CUT_GIM_1060	CUT_GIM_1060	CUT_GIM_1060	chrX	319658	319798	-	CUT_GIM_RNA	CUT
CUT_GIM_0825	CUT_GIM_0825	CUT_GIM_0825	chrXII	553640	553854	-	CUT_GIM_RNA	CUT
CUT_GIM_0600	CUT_GIM_0600	CUT_GIM_0600	chrXV	206056	206226	+	CUT_GIM_RNA	CUT
CUT_GIM_0624	CUT_GIM_0624	CUT_GIM_0624	chrXV	553166	553414	+	CUT_GIM_RNA	CUT
CUT_GIM_0632	CUT_GIM_0632	CUT_GIM_0632	chrXV	458175	458586	+	CUT_GIM_RNA	CUT
CUT_GIM_0700	CUT_GIM_0700	CUT_GIM_0700	chrXV	167536	167859	-	CUT_GIM_RNA	CUT
CUT_GIM_0789	CUT_GIM_0789	CUT_GIM_0789	chrXII	245631	246434	+	CUT_GIM_RNA	CUT
CUT_GIM_0837	CUT_GIM_0837	CUT_GIM_0837	chrXII	839872	840036	-	CUT_GIM_RNA	CUT
CUT_GIM_1213	CUT_GIM_1213	CUT_GIM_1213	chrIV	1095548	1095714	-	CUT_GIM_RNA	CUT
CUT_GIM_0495	CUT_GIM_0495	CUT_GIM_0495	chrVII	800548	800622	+	CUT_GIM_RNA	CUT
CUT_GIM_0183	CUT_GIM_0183	CUT_GIM_0183	chrXIV	576577	576915	+	CUT_GIM_RNA	CUT
CUT_GIM_0161	CUT_GIM_0161	CUT_GIM_0161	chrVI	224241	224469	+	CUT_GIM_RNA	CUT
CUT_GIM_0151	CUT_GIM_0151	CUT_GIM_0151	chrII	452850	453380	-	CUT_GIM_RNA	CUT
CUT_GIM_0521	CUT_GIM_0521	CUT_GIM_0521	chrVII	733376	733769	-	CUT_GIM_RNA	CUT
CUT_GIM_0474	CUT_GIM_0474	CUT_GIM_0474	chrVII	904687	904944	+	CUT_GIM_RNA	CUT
CUT_GIM_1082	CUT_GIM_1082	CUT_GIM_1082	chrX	380049	381066	-	CUT_GIM_RNA	CUT
CUT_GIM_1136	CUT_GIM_1136	CUT_GIM_1136	chrIV	133273	133500	+	CUT_GIM_RNA	CUT
CUT_GIM_1159	CUT_GIM_1159	CUT_GIM_1159	chrIV	816736	817044	+	CUT_GIM_RNA	CUT
CUT_GIM_0193	CUT_GIM_0193	CUT_GIM_0193	chrXIV	146774	146864	+	CUT_GIM_RNA	CUT
CUT_GIM_0716	CUT_GIM_0716	CUT_GIM_0716	chrIX	403634	403664	+	CUT_GIM_RNA	CUT
CUT_GIM_0722	CUT_GIM_0722	CUT_GIM_0722	chrIX	310872	310911	+	CUT_GIM_RNA	CUT
CUT_GIM_0391	CUT_GIM_0391	CUT_GIM_0391	chrXI	70779	71048	+	CUT_GIM_RNA	CUT
CUT_GIM_1204	CUT_GIM_1204	CUT_GIM_1204	chrIV	1436467	1436690	-	CUT_GIM_RNA	CUT
CUT_GIM_0307	CUT_GIM_0307	CUT_GIM_0307	chrXVI	719591	720245	+	CUT_GIM_RNA	CUT
CUT_GIM_0382	CUT_GIM_0382	CUT_GIM_0382	chrXI	245557	246038	+	CUT_GIM_RNA	CUT
CUT_GIM_1101	CUT_GIM_1101	CUT_GIM_1101	chrIV	560699	561091	+	CUT_GIM_RNA	CUT
CUT_GIM_0675	CUT_GIM_0675	CUT_GIM_0675	chrXV	267701	267947	-	CUT_GIM_RNA	CUT
CUT_GIM_1191	CUT_GIM_1191	CUT_GIM_1191	chrIV	1477830	1478368	-	CUT_GIM_RNA	CUT
CUT_GIM_0963	CUT_GIM_0963	CUT_GIM_0963	chrIII	120109	120577	+	CUT_GIM_RNA	CUT
CUT_GIM_0912	CUT_GIM_0912	CUT_GIM_0912	chrXIII	745742	746032	-	CUT_GIM_RNA	CUT
CUT_GIM_0163	CUT_GIM_0163	CUT_GIM_0163	chrVI	110175	110581	+	CUT_GIM_RNA	CUT
CUT_GIM_1105	CUT_GIM_1105	CUT_GIM_1105	chrIV	1189391	1189573	+	CUT_GIM_RNA	CUT
CUT_GIM_1117	CUT_GIM_1117	CUT_GIM_1117	chrIV	1106087	1106312	+	CUT_GIM_RNA	CUT
CUT_GIM_0560	CUT_GIM_0560	CUT_GIM_0560	chrVII	904737	904919	-	CUT_GIM_RNA	CUT
CUT_GIM_0281	CUT_GIM_0281	CUT_GIM_0281	chrXVI	226038	226997	+	CUT_GIM_RNA	CUT
CUT_GIM_1248	CUT_GIM_1248	CUT_GIM_1248	chrI	138600	138835	+	CUT_GIM_RNA	CUT
CUT_GIM_0547	CUT_GIM_0547	CUT_GIM_0547	chrVII	671517	671901	-	CUT_GIM_RNA	CUT
CUT_GIM_0964	CUT_GIM_0964	CUT_GIM_0964	chrIII	27490	27940	+	CUT_GIM_RNA	CUT
CUT_GIM_0078	CUT_GIM_0078	CUT_GIM_0078	chrII	799211	799497	+	CUT_GIM_RNA	CUT
CUT_GIM_0613	CUT_GIM_0613	CUT_GIM_0613	chrXV	206056	206386	+	CUT_GIM_RNA	CUT
CUT_GIM_0479	CUT_GIM_0479	CUT_GIM_0479	chrVII	484119	485117	+	CUT_GIM_RNA	CUT
CUT_GIM_0720	CUT_GIM_0720	CUT_GIM_0720	chrIX	142836	143050	+	CUT_GIM_RNA	CUT
CUT_GIM_1293	CUT_GIM_1293	CUT_GIM_1293	chrVIII	551206	551484	-	CUT_GIM_RNA	CUT
CUT_GIM_0687	CUT_GIM_0687	CUT_GIM_0687	chrXV	379592	380498	-	CUT_GIM_RNA	CUT
CUT_GIM_1230	CUT_GIM_1230	CUT_GIM_1230	chrIV	589256	589451	-	CUT_GIM_RNA	CUT
CUT_GIM_0298	CUT_GIM_0298	CUT_GIM_0298	chrXVI	565283	565474	+	CUT_GIM_RNA	CUT
CUT_GIM_1009	CUT_GIM_1009	CUT_GIM_1009	chrX	619622	620147	+	CUT_GIM_RNA	CUT
CUT_GIM_0303	CUT_GIM_0303	CUT_GIM_0303	chrXVI	289395	289647	+	CUT_GIM_RNA	CUT
CUT_GIM_0098	CUT_GIM_0098	CUT_GIM_0098	chrII	718447	718827	+	CUT_GIM_RNA	CUT
CUT_GIM_0160	CUT_GIM_0160	CUT_GIM_0160	chrVI	259374	259636	+	CUT_GIM_RNA	CUT
CUT_GIM_0579	CUT_GIM_0579	CUT_GIM_0579	chrVII	984430	984648	-	CUT_GIM_RNA	CUT
CUT_GIM_0310	CUT_GIM_0310	CUT_GIM_0310	chrXVI	14645	14996	+	CUT_GIM_RNA	CUT
CUT_GIM_0683	CUT_GIM_0683	CUT_GIM_0683	chrXV	522307	522634	-	CUT_GIM_RNA	CUT
CUT_GIM_0799	CUT_GIM_0799	CUT_GIM_0799	chrXII	542082	542416	+	CUT_GIM_RNA	CUT
CUT_GIM_0562	CUT_GIM_0562	CUT_GIM_0562	chrVII	94417	94645	-	CUT_GIM_RNA	CUT
CUT_GIM_0985	CUT_GIM_0985	CUT_GIM_0985	chrIII	152018	152573	-	CUT_GIM_RNA	CUT
CUT_GIM_0971	CUT_GIM_0971	CUT_GIM_0971	chrIII	75979	76205	+	CUT_GIM_RNA	CUT
CUT_GIM_1090	CUT_GIM_1090	CUT_GIM_1090	chrIV	545706	545921	+	CUT_GIM_RNA	CUT
CUT_GIM_0324	CUT_GIM_0324	CUT_GIM_0324	chrXVI	207388	207388	-	CUT_GIM_RNA	CUT
CUT_GIM_1300	CUT_GIM_1300	CUT_GIM_1300	chrVIII	81604	81788	-	CUT_GIM_RNA	CUT
CUT_GIM_0315	CUT_GIM_0315	CUT_GIM_0315	chrXVI	382854	382988	-	CUT_GIM_RNA	CUT
CUT_GIM_0330	CUT_GIM_0330	CUT_GIM_0330	chrXVI	132006	132206	-	CUT_GIM_RNA	CUT
CUT_GIM_0602	CUT_GIM_0602	CUT_GIM_0602	chrXV	251476	251672	+	CUT_GIM_RNA	CUT
CUT_GIM_0240	CUT_GIM_0240	CUT_GIM_0240	chrXIV	331981	332178	-	CUT_GIM_RNA	CUT
CUT_GIM_0483	CUT_GIM_0483	CUT_GIM_0483	chrVII	605742	605984	+	CUT_GIM_RNA	CUT
CUT_GIM_0435	CUT_GIM_0435	CUT_GIM_0435	chrXI	259809	260314	-	CUT_GIM_RNA	CUT
CUT_GIM_0808	CUT_GIM_0808	CUT_GIM_0808	chrXII	796783	797128	+	CUT_GIM_RNA	CUT
CUT_GIM_0023	CUT_GIM_0023	CUT_GIM_0023	chrV	302500	303193	+	CUT_GIM_RNA	CUT
CUT_GIM_0338	CUT_GIM_0338	CUT_GIM_0338	chrXVI	697012	697302	-	CUT_GIM_RNA	CUT
CUT_GIM_0060	CUT_GIM_0060	CUT_GIM_0060	chrV	452952	453130	-	CUT_GIM_RNA	CUT
CUT_GIM_0253	CUT_GIM_0253	CUT_GIM_0253	chrXIV	604261	604670	-	CUT_GIM_RNA	CUT
CUT_GIM_0754	CUT_GIM_0754	CUT_GIM_0754	chrXII	669189	669485	+	CUT_GIM_RNA	CUT
CUT_GIM_0380	CUT_GIM_0380	CUT_GIM_0380	chrXI	340545	341009	+	CUT_GIM_RNA	CUT
CUT_GIM_0948	CUT_GIM_0948	CUT_GIM_0948	chrXIII	674726	674848	-	CUT_GIM_RNA	CUT
CUT_GIM_1255	CUT_GIM_1255	CUT_GIM_1255	chrI	67799	67932	-	CUT_GIM_RNA	CUT
CUT_GIM_1114	CUT_GIM_1114	CUT_GIM_1114	chrIV	74383	74925	+	CUT_GIM_RNA	CUT
CUT_GIM_0699	CUT_GIM_0699	CUT_GIM_0699	chrXV	521835	522634	-	CUT_GIM_RNA	CUT
CUT_GIM_0261	CUT_GIM_0261	CUT_GIM_0261	chrXIV	12055	12736	-	CUT_GIM_RNA	CUT
CUT_GIM_0416	CUT_GIM_0416	CUT_GIM_0416	chrXI	164368	164598	-	CUT_GIM_RNA	CUT
CUT_GIM_1198	CUT_GIM_1198	CUT_GIM_1198	chrIV	365824	366053	-	CUT_GIM_RNA	CUT
CUT_GIM_0064	CUT_GIM_0064	CUT_GIM_0064	chrV	363612	364230	-	CUT_GIM_RNA	CUT
CUT_GIM_0463	CUT_GIM_0463	CUT_GIM_0463	chrVII	678398	678569	+	CUT_GIM_RNA	CUT
CUT_GIM_0998	CUT_GIM_0998	CUT_GIM_0998	chrX	186873	187036	+	CUT_GIM_RNA	CUT
CUT_GIM_0571	CUT_GIM_0571	CUT_GIM_0571	chrVII	753836	754336	-	CUT_GIM_RNA	CUT
CUT_GIM_0883	CUT_GIM_0883	CUT_GIM_0883	chrXIII	540914	541065	+	CUT_GIM_RNA	CUT
CUT_GIM_0442	CUT_GIM_0442	CUT_GIM_0442	chrVII	383414	383505	+	CUT_GIM_RNA	CUT
CUT_GIM_0241	CUT_GIM_0241	CUT_GIM_0241	chrXIV	542030	542765	-	CUT_GIM_RNA	CUT
CUT_GIM_1262	CUT_GIM_1262	CUT_GIM_1262	chrVIII	250515	250524	+	CUT_GIM_RNA	CUT
CUT_GIM_0127	CUT_GIM_0127	CUT_GIM_0127	chrII	634527	634813	-	CUT_GIM_RNA	CUT
CUT_GIM_0353	CUT_GIM_0353	CUT_GIM_0353	chrXVI	352218	352413	-	CUT_GIM_RNA	CUT
CUT_GIM_0218	CUT_GIM_0218	CUT_GIM_0218	chrXIV	355159	356160	-	CUT_GIM_RNA	CUT
CUT_GIM_0226	CUT_GIM_0226	CUT_GIM_0226	chrXIV	479088	479160	-	CUT_GIM_RNA	CUT
CUT_GIM_0565	CUT_GIM_0565	CUT_GIM_0565	chrVII	732886	733246	-	CUT_GIM_RNA	CUT
CUT_GIM_0757	CUT_GIM_0757	CUT_GIM_0757	chrXII	185099	185480	+	CUT_GIM_RNA	CUT
CUT_GIM_0313	CUT_GIM_0313	CUT_GIM_0313	chrXVI	527233	527713	-	CUT_GIM_RNA	CUT
CUT_GIM_0254	CUT_GIM_0254	CUT_GIM_0254	chrXIV	240998	241339	-	CUT_GIM_RNA	CUT
CUT_GIM_0887	CUT_GIM_0887	CUT_GIM_0887	chrXIII	860291	860516	+	CUT_GIM_RNA	CUT
CUT_GIM_0257	CUT_GIM_0257	CUT_GIM_0257	chrXIV	576750	577408	-	CUT_GIM_RNA	CUT
CUT_GIM_0294	CUT_GIM_0294	CUT_GIM_0294	chrXVI	409097	409691	+	CUT_GIM_RNA	CUT
CUT_GIM_0233	CUT_GIM_0233	CUT_GIM_0233	chrXIV	15668	16242	-	CUT_GIM_RNA	CUT
CUT_GIM_0082	CUT_GIM_0082	CUT_GIM_0082	chrII	292268	292896	+	CUT_GIM_RNA	CUT
CUT_GIM_0707	CUT_GIM_0707	CUT_GIM_0707	chrIX	257660	257805	+	CUT_GIM_RNA	CUT
CUT_GIM_0510	CUT_GIM_0510	CUT_GIM_0510	chrVII	420898	421307	+	CUT_GIM_RNA	CUT
CUT_GIM_0237	CUT_GIM_0237	CUT_GIM_0237	chrXIV	31436	31487	-	CUT_GIM_RNA	CUT
CUT_GIM_0619	CUT_GIM_0619	CUT_GIM_0619	chrXV	21913	22346	+	CUT_GIM_RNA	CUT
CUT_GIM_1279	CUT_GIM_1279	CUT_GIM_1279	chrVIII	451206	451699	+	CUT_GIM_RNA	CUT
CUT_GIM_0280	CUT_GIM_0280	CUT_GIM_0280	chrXVI	455455	455732	+	CUT_GIM_RNA	CUT
CUT_GIM_0681	CUT_GIM_0681	CUT_GIM_0681	chrXV	554689	554788	-	CUT_GIM_RNA	CUT
CUT_GIM_0612	CUT_GIM_0612	CUT_GIM_0612	chrXV	241803	241839	+	CUT_GIM_RNA	CUT
CUT_GIM_1096	CUT_GIM_1096	CUT_GIM_1096	chrIV	57016	57101	+	CUT_GIM_RNA	CUT
CUT_GIM_0859	CUT_GIM_0859	CUT_GIM_0859	chrXII	447550	448433	-	CUT_GIM_RNA	CUT
CUT_GIM_0669	CUT_GIM_0669	CUT_GIM_0669	chrXV	127879	128081	-	CUT_GIM_RNA	CUT
CUT_GIM_0842	CUT_GIM_0842	CUT_GIM_0842	chrXII	866632	866810	-	CUT_GIM_RNA	CUT
CUT_GIM_0991	CUT_GIM_0991	CUT_GIM_0991	chrX	161896	162054	+	CUT_GIM_RNA	CUT
CUT_GIM_0728	CUT_GIM_0728	CUT_GIM_0728	chrIX	126848	127749	-	CUT_GIM_RNA	CUT
CUT_GIM_0441	CUT_GIM_0441	CUT_GIM_0441	chrVII	994288	994320	+	CUT_GIM_RNA	CUT
CUT_GIM_0849	CUT_GIM_0849	CUT_GIM_0849	chrXII	291663	291725	-	CUT_GIM_RNA	CUT
CUT_GIM_0470	CUT_GIM_0470	CUT_GIM_0470	chrVII	154684	154837	+	CUT_GIM_RNA	CUT
CUT_GIM_1078	CUT_GIM_1078	CUT_GIM_1078	chrX	100701	100856	-	CUT_GIM_RNA	CUT
CUT_GIM_1186	CUT_GIM_1186	CUT_GIM_1186	chrIV	98996	99330	-	CUT_GIM_RNA	CUT
CUT_GIM_0514	CUT_GIM_0514	CUT_GIM_0514	chrVII	968847	969194	+	CUT_GIM_RNA	CUT
CUT_GIM_1113	CUT_GIM_1113	CUT_GIM_1113	chrIV	57016	57900	+	CUT_GIM_RNA	CUT
CUT_GIM_0564	CUT_GIM_0564	CUT_GIM_0564	chrVII	879512	879993	-	CUT_GIM_RNA	CUT
CUT_GIM_0191	CUT_GIM_0191	CUT_GIM_0191	chrXIV	441340	441389	+	CUT_GIM_RNA	CUT
CUT_GIM_1040	CUT_GIM_1040	CUT_GIM_1040	chrX	413738	413946	+	CUT_GIM_RNA	CUT
CUT_GIM_0352	CUT_GIM_0352	CUT_GIM_0352	chrXVI	480983	481250	-	CUT_GIM_RNA	CUT
CUT_GIM_1270	CUT_GIM_1270	CUT_GIM_1270	chrVIII	187141	187449	+	CUT_GIM_RNA	CUT
CUT_GIM_1308	CUT_GIM_1308	CUT_GIM_1308	chrVIII	74214	75044	-	CUT_GIM_RNA	CUT
CUT_GIM_0215	CUT_GIM_0215	CUT_GIM_0215	chrXIV	282059	282239	+	CUT_GIM_RNA	CUT
CUT_GIM_0567	CUT_GIM_0567	CUT_GIM_0567	chrVII	779791	779944	-	CUT_GIM_RNA	CUT
CUT_GIM_1049	CUT_GIM_1049	CUT_GIM_1049	chrX	36241	36493	-	CUT_GIM_RNA	CUT
CUT_GIM_0432	CUT_GIM_0432	CUT_GIM_0432	chrXI	279640	280245	-	CUT_GIM_RNA	CUT
CUT_GIM_1050	CUT_GIM_1050	CUT_GIM_1050	chrX	119427	119663	-	CUT_GIM_RNA	CUT
CUT_GIM_0259	CUT_GIM_0259	CUT_GIM_0259	chrXIV	358646	359251	-	CUT_GIM_RNA	CUT
CUT_GIM_0913	CUT_GIM_0913	CUT_GIM_0913	chrXIII	664173	664422	-	CUT_GIM_RNA	CUT
CUT_GIM_0302	CUT_GIM_0302	CUT_GIM_0302	chrXVI	352662	352875	+	CUT_GIM_RNA	CUT
CUT_GIM_0145	CUT_GIM_0145	CUT_GIM_0145	chrII	426463	426846	-	CUT_GIM_RNA	CUT
CUT_GIM_0206	CUT_GIM_0206	CUT_GIM_0206	chrXIV	270163	271204	+	CUT_GIM_RNA	CUT
CUT_GIM_0480	CUT_GIM_0480	CUT_GIM_0480	chrVII	548096	548097	+	CUT_GIM_RNA	CUT
CUT_GIM_1193	CUT_GIM_1193	CUT_GIM_1193	chrIV	550602	550741	-	CUT_GIM_RNA	CUT
CUT_GIM_1110	CUT_GIM_1110	CUT_GIM_1110	chrIV	681949	682024	+	CUT_GIM_RNA	CUT
CUT_GIM_0424	CUT_GIM_0424	CUT_GIM_0424	chrXI	639543	640321	-	CUT_GIM_RNA	CUT
CUT_GIM_1252	CUT_GIM_1252	CUT_GIM_1252	chrI	184436	184668	-	CUT_GIM_RNA	CUT
CUT_GIM_1228	CUT_GIM_1228	CUT_GIM_1228	chrIV	247734	248022	-	CUT_GIM_RNA	CUT
CUT_GIM_0513	CUT_GIM_0513	CUT_GIM_0513	chrVII	303631	304076	+	CUT_GIM_RNA	CUT
CUT_GIM_0802	CUT_GIM_0802	CUT_GIM_0802	chrXII	238025	238308	+	CUT_GIM_RNA	CUT
CUT_GIM_0026	CUT_GIM_0026	CUT_GIM_0026	chrV	291758	292074	+	CUT_GIM_RNA	CUT
CUT_GIM_1183	CUT_GIM_1183	CUT_GIM_1183	chrIV	392352	393348	-	CUT_GIM_RNA	CUT
CUT_GIM_0124	CUT_GIM_0124	CUT_GIM_0124	chrII	770460	770646	-	CUT_GIM_RNA	CUT
CUT_GIM_0581	CUT_GIM_0581	CUT_GIM_0581	chrVII	314224	314429	-	CUT_GIM_RNA	CUT
CUT_GIM_1014	CUT_GIM_1014	CUT_GIM_1014	chrX	134244	134592	+	CUT_GIM_RNA	CUT
CUT_GIM_1249	CUT_GIM_1249	CUT_GIM_1249	chrI	42920	43150	+	CUT_GIM_RNA	CUT
CUT_GIM_0363	CUT_GIM_0363	CUT_GIM_0363	chrXVI	74728	75335	-	CUT_GIM_RNA	CUT
CUT_GIM_1290	CUT_GIM_1290	CUT_GIM_1290	chrVIII	147481	147675	-	CUT_GIM_RNA	CUT
CUT_GIM_0755	CUT_GIM_0755	CUT_GIM_0755	chrXII	723736	724102	+	CUT_GIM_RNA	CUT
CUT_GIM_0608	CUT_GIM_0608	CUT_GIM_0608	chrXV	1008778	1009767	+	CUT_GIM_RNA	CUT
CUT_GIM_0207	CUT_GIM_0207	CUT_GIM_0207	chrXIV	559638	559848	+	CUT_GIM_RNA	CUT
CUT_GIM_1194	CUT_GIM_1194	CUT_GIM_1194	chrIV	765138	765322	-	CUT_GIM_RNA	CUT
CUT_GIM_0053	CUT_GIM_0053	CUT_GIM_0053	chrV	234432	234701	-	CUT_GIM_RNA	CUT
CUT_GIM_0732	CUT_GIM_0732	CUT_GIM_0732	chrIX	398235	398941	-	CUT_GIM_RNA	CUT
CUT_GIM_1051	CUT_GIM_1051	CUT_GIM_1051	chrX	159768	159897	-	CUT_GIM_RNA	CUT
CUT_GIM_0835	CUT_GIM_0835	CUT_GIM_0835	chrXII	100283	100583	-	CUT_GIM_RNA	CUT
CUT_GIM_0051	CUT_GIM_0051	CUT_GIM_0051	chrV	284176	284219	-	CUT_GIM_RNA	CUT
CUT_GIM_0169	CUT_GIM_0169	CUT_GIM_0169	chrVI	262917	263141	-	CUT_GIM_RNA	CUT
CUT_GIM_1185	CUT_GIM_1185	CUT_GIM_1185	chrIV	829098	829613	-	CUT_GIM_RNA	CUT
CUT_GIM_0974	CUT_GIM_0974	CUT_GIM_0974	chrIII	23709	24551	+	CUT_GIM_RNA	CUT
CUT_GIM_0017	CUT_GIM_0017	CUT_GIM_0017	chrV	395261	395470	+	CUT_GIM_RNA	CUT
CUT_GIM_0159	CUT_GIM_0159	CUT_GIM_0159	chrVI	75059	75203	+	CUT_GIM_RNA	CUT
CUT_GIM_1064	CUT_GIM_1064	CUT_GIM_1064	chrX	406834	407327	-	CUT_GIM_RNA	CUT
CUT_GIM_0256	CUT_GIM_0256	CUT_GIM_0256	chrXIV	663533	663665	-	CUT_GIM_RNA	CUT
CUT_GIM_0487	CUT_GIM_0487	CUT_GIM_0487	chrVII	173273	173871	+	CUT_GIM_RNA	CUT
CUT_GIM_0986	CUT_GIM_0986	CUT_GIM_0986	chrIII	148439	148591	-	CUT_GIM_RNA	CUT
CUT_GIM_0890	CUT_GIM_0890	CUT_GIM_0890	chrXIII	675024	675793	+	CUT_GIM_RNA	CUT
CUT_GIM_0358	CUT_GIM_0358	CUT_GIM_0358	chrXVI	84194	84334	-	CUT_GIM_RNA	CUT
CUT_GIM_0648	CUT_GIM_0648	CUT_GIM_0648	chrXV	769827	770809	+	CUT_GIM_RNA	CUT
CUT_GIM_0406	CUT_GIM_0406	CUT_GIM_0406	chrXI	510784	511601	+	CUT_GIM_RNA	CUT
CUT_GIM_1302	CUT_GIM_1302	CUT_GIM_1302	chrVIII	195021	195298	-	CUT_GIM_RNA	CUT
CUT_GIM_0509	CUT_GIM_0509	CUT_GIM_0509	chrVII	280774	281009	+	CUT_GIM_RNA	CUT
CUT_GIM_0940	CUT_GIM_0940	CUT_GIM_0940	chrXIII	216661	217087	-	CUT_GIM_RNA	CUT
CUT_GIM_0095	CUT_GIM_0095	CUT_GIM_0095	chrII	310585	310856	+	CUT_GIM_RNA	CUT
CUT_GIM_0361	CUT_GIM_0361	CUT_GIM_0361	chrXVI	66598	66971	-	CUT_GIM_RNA	CUT
CUT_GIM_0616	CUT_GIM_0616	CUT_GIM_0616	chrXV	720506	720825	+	CUT_GIM_RNA	CUT
CUT_GIM_0826	CUT_GIM_0826	CUT_GIM_0826	chrXII	230441	230593	-	CUT_GIM_RNA	CUT
CUT_GIM_0056	CUT_GIM_0056	CUT_GIM_0056	chrV	225206	225342	-	CUT_GIM_RNA	CUT
CUT_GIM_0523	CUT_GIM_0523	CUT_GIM_0523	chrVII	547596	547666	-	CUT_GIM_RNA	CUT
CUT_GIM_1189	CUT_GIM_1189	CUT_GIM_1189	chrIV	22208	22458	-	CUT_GIM_RNA	CUT
CUT_GIM_0941	CUT_GIM_0941	CUT_GIM_0941	chrXIII	14550	14957	-	CUT_GIM_RNA	CUT
CUT_GIM_0987	CUT_GIM_0987	CUT_GIM_0987	chrIII	157048	157502	-	CUT_GIM_RNA	CUT
CUT_GIM_0962	CUT_GIM_0962	CUT_GIM_0962	chrXIII	378751	379418	-	CUT_GIM_RNA	CUT
CUT_GIM_0611	CUT_GIM_0611	CUT_GIM_0611	chrXV	83725	83942	+	CUT_GIM_RNA	CUT
CUT_GIM_1166	CUT_GIM_1166	CUT_GIM_1166	chrIV	1174036	1174299	-	CUT_GIM_RNA	CUT
CUT_GIM_0105	CUT_GIM_0105	CUT_GIM_0105	chrII	351068	351588	+	CUT_GIM_RNA	CUT
CUT_GIM_0027	CUT_GIM_0027	CUT_GIM_0027	chrV	140973	141421	+	CUT_GIM_RNA	CUT
CUT_GIM_1178	CUT_GIM_1178	CUT_GIM_1178	chrIV	1321584	1321978	-	CUT_GIM_RNA	CUT
CUT_GIM_0340	CUT_GIM_0340	CUT_GIM_0340	chrXVI	754228	754505	-	CUT_GIM_RNA	CUT
CUT_GIM_0955	CUT_GIM_0955	CUT_GIM_0955	chrXIII	660334	660942	-	CUT_GIM_RNA	CUT
CUT_GIM_0007	CUT_GIM_0007	CUT_GIM_0007	chrV	237460	237728	+	CUT_GIM_RNA	CUT
CUT_GIM_0830	CUT_GIM_0830	CUT_GIM_0830	chrXII	657778	657973	-	CUT_GIM_RNA	CUT
CUT_GIM_1212	CUT_GIM_1212	CUT_GIM_1212	chrIV	1476471	1476680	-	CUT_GIM_RNA	CUT
CUT_GIM_0895	CUT_GIM_0895	CUT_GIM_0895	chrXIII	661429	661721	+	CUT_GIM_RNA	CUT
CUT_GIM_0100	CUT_GIM_0100	CUT_GIM_0100	chrII	484744	484952	+	CUT_GIM_RNA	CUT
CUT_GIM_0028	CUT_GIM_0028	CUT_GIM_0028	chrV	60507	61168	+	CUT_GIM_RNA	CUT
CUT_GIM_0741	CUT_GIM_0741	CUT_GIM_0741	chrIX	381765	382139	-	CUT_GIM_RNA	CUT
CUT_GIM_0403	CUT_GIM_0403	CUT_GIM_0403	chrXI	134345	134757	+	CUT_GIM_RNA	CUT
CUT_GIM_0627	CUT_GIM_0627	CUT_GIM_0627	chrXV	421888	422092	+	CUT_GIM_RNA	CUT
CUT_GIM_0316	CUT_GIM_0316	CUT_GIM_0316	chrXVI	844039	844367	-	CUT_GIM_RNA	CUT
CUT_GIM_1247	CUT_GIM_1247	CUT_GIM_1247	chrI	181353	181489	+	CUT_GIM_RNA	CUT
CUT_GIM_0296	CUT_GIM_0296	CUT_GIM_0296	chrXVI	876849	876893	+	CUT_GIM_RNA	CUT
CUT_GIM_1233	CUT_GIM_1233	CUT_GIM_1233	chrIV	155612	155966	-	CUT_GIM_RNA	CUT
CUT_GIM_1276	CUT_GIM_1276	CUT_GIM_1276	chrVIII	488599	488807	+	CUT_GIM_RNA	CUT
CUT_GIM_0077	CUT_GIM_0077	CUT_GIM_0077	chrII	405960	406663	+	CUT_GIM_RNA	CUT
CUT_GIM_0806	CUT_GIM_0806	CUT_GIM_0806	chrXII	500581	501138	+	CUT_GIM_RNA	CUT
CUT_GIM_1164	CUT_GIM_1164	CUT_GIM_1164	chrIV	811532	811703	-	CUT_GIM_RNA	CUT
CUT_GIM_0331	CUT_GIM_0331	CUT_GIM_0331	chrXVI	255199	255560	-	CUT_GIM_RNA	CUT
CUT_GIM_0477	CUT_GIM_0477	CUT_GIM_0477	chrVII	842755	843002	+	CUT_GIM_RNA	CUT
CUT_GIM_0670	CUT_GIM_0670	CUT_GIM_0670	chrXV	27181	27384	-	CUT_GIM_RNA	CUT
CUT_GIM_1226	CUT_GIM_1226	CUT_GIM_1226	chrIV	1004460	1005337	-	CUT_GIM_RNA	CUT
CUT_GIM_0635	CUT_GIM_0635	CUT_GIM_0635	chrXV	430249	430559	+	CUT_GIM_RNA	CUT
CUT_GIM_0379	CUT_GIM_0379	CUT_GIM_0379	chrXI	66541	66832	+	CUT_GIM_RNA	CUT
CUT_GIM_0828	CUT_GIM_0828	CUT_GIM_0828	chrXII	830535	830759	-	CUT_GIM_RNA	CUT
CUT_GIM_0427	CUT_GIM_0427	CUT_GIM_0427	chrXI	285774	286343	-	CUT_GIM_RNA	CUT
CUT_GIM_0527	CUT_GIM_0527	CUT_GIM_0527	chrVII	727315	727453	-	CUT_GIM_RNA	CUT
CUT_GIM_0506	CUT_GIM_0506	CUT_GIM_0506	chrVII	225929	226217	+	CUT_GIM_RNA	CUT
CUT_GIM_0295	CUT_GIM_0295	CUT_GIM_0295	chrXVI	492416	492636	+	CUT_GIM_RNA	CUT
CUT_GIM_1146	CUT_GIM_1146	CUT_GIM_1146	chrIV	321617	321654	+	CUT_GIM_RNA	CUT
CUT_GIM_0892	CUT_GIM_0892	CUT_GIM_0892	chrXIII	751653	751829	+	CUT_GIM_RNA	CUT
CUT_GIM_0730	CUT_GIM_0730	CUT_GIM_0730	chrIX	165645	165924	-	CUT_GIM_RNA	CUT
CUT_GIM_0481	CUT_GIM_0481	CUT_GIM_0481	chrVII	212997	213261	+	CUT_GIM_RNA	CUT
CUT_GIM_0726	CUT_GIM_0726	CUT_GIM_0726	chrIX	199545	200312	+	CUT_GIM_RNA	CUT
CUT_GIM_0172	CUT_GIM_0172	CUT_GIM_0172	chrVI	131095	131397	-	CUT_GIM_RNA	CUT
CUT_GIM_0655	CUT_GIM_0655	CUT_GIM_0655	chrXV	1008899	1009889	-	CUT_GIM_RNA	CUT
CUT_GIM_0575	CUT_GIM_0575	CUT_GIM_0575	chrVII	508133	508261	-	CUT_GIM_RNA	CUT
CUT_GIM_0496	CUT_GIM_0496	CUT_GIM_0496	chrVII	122582	122743	+	CUT_GIM_RNA	CUT
CUT_GIM_1289	CUT_GIM_1289	CUT_GIM_1289	chrVIII	553623	553915	-	CUT_GIM_RNA	CUT
CUT_GIM_0638	CUT_GIM_0638	CUT_GIM_0638	chrXV	363823	364011	+	CUT_GIM_RNA	CUT
CUT_GIM_0958	CUT_GIM_0958	CUT_GIM_0958	chrXIII	284282	284620	-	CUT_GIM_RNA	CUT
CUT_GIM_0888	CUT_GIM_0888	CUT_GIM_0888	chrXIII	480407	480590	+	CUT_GIM_RNA	CUT
CUT_GIM_0285	CUT_GIM_0285	CUT_GIM_0285	chrXVI	675907	676034	+	CUT_GIM_RNA	CUT
CUT_GIM_0590	CUT_GIM_0590	CUT_GIM_0590	chrXV	571958	572012	+	CUT_GIM_RNA	CUT
CUT_GIM_0747	CUT_GIM_0747	CUT_GIM_0747	chrIX	259566	259938	-	CUT_GIM_RNA	CUT
CUT_GIM_0065	CUT_GIM_0065	CUT_GIM_0065	chrV	271291	271533	-	CUT_GIM_RNA	CUT
CUT_GIM_1229	CUT_GIM_1229	CUT_GIM_1229	chrIV	915957	916167	-	CUT_GIM_RNA	CUT
CUT_GIM_1006	CUT_GIM_1006	CUT_GIM_1006	chrX	572308	572464	+	CUT_GIM_RNA	CUT
CUT_GIM_1017	CUT_GIM_1017	CUT_GIM_1017	chrX	181499	181964	+	CUT_GIM_RNA	CUT
CUT_GIM_0111	CUT_GIM_0111	CUT_GIM_0111	chrII	257005	257141	+	CUT_GIM_RNA	CUT
CUT_GIM_1268	CUT_GIM_1268	CUT_GIM_1268	chrVIII	554188	554415	+	CUT_GIM_RNA	CUT
CUT_GIM_1124	CUT_GIM_1124	CUT_GIM_1124	chrIV	1359146	1359434	+	CUT_GIM_RNA	CUT
CUT_GIM_0047	CUT_GIM_0047	CUT_GIM_0047	chrV	259376	259829	-	CUT_GIM_RNA	CUT
CUT_GIM_0092	CUT_GIM_0092	CUT_GIM_0092	chrII	426047	426314	+	CUT_GIM_RNA	CUT
CUT_GIM_0758	CUT_GIM_0758	CUT_GIM_0758	chrXII	839797	840077	+	CUT_GIM_RNA	CUT
CUT_GIM_0021	CUT_GIM_0021	CUT_GIM_0021	chrV	225851	225977	+	CUT_GIM_RNA	CUT
CUT_GIM_0894	CUT_GIM_0894	CUT_GIM_0894	chrXIII	164550	164695	+	CUT_GIM_RNA	CUT
CUT_GIM_0568	CUT_GIM_0568	CUT_GIM_0568	chrVII	741690	742096	-	CUT_GIM_RNA	CUT
CUT_GIM_0063	CUT_GIM_0063	CUT_GIM_0063	chrV	432603	432854	-	CUT_GIM_RNA	CUT
CUT_GIM_0640	CUT_GIM_0640	CUT_GIM_0640	chrXV	869457	870162	+	CUT_GIM_RNA	CUT
CUT_GIM_0760	CUT_GIM_0760	CUT_GIM_0760	chrXII	97858	98063	+	CUT_GIM_RNA	CUT
CUT_GIM_0566	CUT_GIM_0566	CUT_GIM_0566	chrVII	879087	879993	-	CUT_GIM_RNA	CUT
CUT_GIM_0917	CUT_GIM_0917	CUT_GIM_0917	chrXIII	789656	789909	-	CUT_GIM_RNA	CUT
CUT_GIM_0184	CUT_GIM_0184	CUT_GIM_0184	chrXIV	739715	739990	+	CUT_GIM_RNA	CUT
CUT_GIM_1152	CUT_GIM_1152	CUT_GIM_1152	chrIV	104954	105200	+	CUT_GIM_RNA	CUT
CUT_GIM_0418	CUT_GIM_0418	CUT_GIM_0418	chrXI	524563	525116	-	CUT_GIM_RNA	CUT
CUT_GIM_1167	CUT_GIM_1167	CUT_GIM_1167	chrIV	954902	955880	-	CUT_GIM_RNA	CUT
CUT_GIM_0533	CUT_GIM_0533	CUT_GIM_0533	chrVII	319003	319535	-	CUT_GIM_RNA	CUT
CUT_GIM_0817	CUT_GIM_0817	CUT_GIM_0817	chrXII	259464	260155	-	CUT_GIM_RNA	CUT
CUT_GIM_1137	CUT_GIM_1137	CUT_GIM_1137	chrIV	442563	442842	+	CUT_GIM_RNA	CUT
CUT_GIM_1023	CUT_GIM_1023	CUT_GIM_1023	chrX	402255	402389	+	CUT_GIM_RNA	CUT
CUT_GIM_0544	CUT_GIM_0544	CUT_GIM_0544	chrVII	544762	544929	-	CUT_GIM_RNA	CUT
CUT_GIM_0870	CUT_GIM_0870	CUT_GIM_0870	chrXIII	861444	861704	+	CUT_GIM_RNA	CUT
CUT_GIM_0131	CUT_GIM_0131	CUT_GIM_0131	chrII	512937	513168	-	CUT_GIM_RNA	CUT
CUT_GIM_0794	CUT_GIM_0794	CUT_GIM_0794	chrXII	604210	604631	+	CUT_GIM_RNA	CUT
CUT_GIM_0844	CUT_GIM_0844	CUT_GIM_0844	chrXII	388172	389082	-	CUT_GIM_RNA	CUT
CUT_GIM_0076	CUT_GIM_0076	CUT_GIM_0076	chrII	484744	485253	+	CUT_GIM_RNA	CUT
CUT_GIM_0455	CUT_GIM_0455	CUT_GIM_0455	chrVII	153187	153203	+	CUT_GIM_RNA	CUT
CUT_GIM_0694	CUT_GIM_0694	CUT_GIM_0694	chrXV	611280	611893	-	CUT_GIM_RNA	CUT
CUT_GIM_1239	CUT_GIM_1239	CUT_GIM_1239	chrIV	1145845	1146072	-	CUT_GIM_RNA	CUT
CUT_GIM_1085	CUT_GIM_1085	CUT_GIM_1085	chrX	545262	545460	-	CUT_GIM_RNA	CUT
CUT_GIM_0089	CUT_GIM_0089	CUT_GIM_0089	chrII	140947	141127	+	CUT_GIM_RNA	CUT
CUT_GIM_1126	CUT_GIM_1126	CUT_GIM_1126	chrIV	930290	931145	+	CUT_GIM_RNA	CUT
CUT_GIM_0038	CUT_GIM_0038	CUT_GIM_0038	chrV	544786	545084	-	CUT_GIM_RNA	CUT
CUT_GIM_0715	CUT_GIM_0715	CUT_GIM_0715	chrIX	235705	235825	+	CUT_GIM_RNA	CUT
CUT_GIM_0910	CUT_GIM_0910	CUT_GIM_0910	chrXIII	252934	253880	-	CUT_GIM_RNA	CUT
CUT_GIM_0055	CUT_GIM_0055	CUT_GIM_0055	chrV	400451	400878	-	CUT_GIM_RNA	CUT
CUT_GIM_0884	CUT_GIM_0884	CUT_GIM_0884	chrXIII	349816	350324	+	CUT_GIM_RNA	CUT
CUT_GIM_0029	CUT_GIM_0029	CUT_GIM_0029	chrV	153380	153588	+	CUT_GIM_RNA	CUT
CUT_GIM_0366	CUT_GIM_0366	CUT_GIM_0366	chrXVI	117739	118026	-	CUT_GIM_RNA	CUT
CUT_GIM_1016	CUT_GIM_1016	CUT_GIM_1016	chrX	432408	432587	+	CUT_GIM_RNA	CUT
CUT_GIM_0242	CUT_GIM_0242	CUT_GIM_0242	chrXIV	544591	544968	-	CUT_GIM_RNA	CUT
CUT_GIM_0911	CUT_GIM_0911	CUT_GIM_0911	chrXIII	568205	568359	-	CUT_GIM_RNA	CUT
CUT_GIM_0277	CUT_GIM_0277	CUT_GIM_0277	chrXVI	451568	451718	+	CUT_GIM_RNA	CUT
CUT_GIM_0970	CUT_GIM_0970	CUT_GIM_0970	chrIII	40954	41477	+	CUT_GIM_RNA	CUT
CUT_GIM_1269	CUT_GIM_1269	CUT_GIM_1269	chrVIII	362018	362675	+	CUT_GIM_RNA	CUT
CUT_GIM_0960	CUT_GIM_0960	CUT_GIM_0960	chrXIII	654162	654540	-	CUT_GIM_RNA	CUT
CUT_GIM_1094	CUT_GIM_1094	CUT_GIM_1094	chrIV	525302	525449	+	CUT_GIM_RNA	CUT
CUT_GIM_0907	CUT_GIM_0907	CUT_GIM_0907	chrXIII	353515	353666	-	CUT_GIM_RNA	CUT
CUT_GIM_1052	CUT_GIM_1052	CUT_GIM_1052	chrX	87452	87461	-	CUT_GIM_RNA	CUT
CUT_GIM_0231	CUT_GIM_0231	CUT_GIM_0231	chrXIV	529309	529538	-	CUT_GIM_RNA	CUT
CUT_GIM_0561	CUT_GIM_0561	CUT_GIM_0561	chrVII	276813	277101	-	CUT_GIM_RNA	CUT
CUT_GIM_0676	CUT_GIM_0676	CUT_GIM_0676	chrXV	775223	775466	-	CUT_GIM_RNA	CUT
CUT_GIM_1021	CUT_GIM_1021	CUT_GIM_1021	chrX	717118	717266	+	CUT_GIM_RNA	CUT
CUT_GIM_1074	CUT_GIM_1074	CUT_GIM_1074	chrX	378061	378514	-	CUT_GIM_RNA	CUT
CUT_GIM_1153	CUT_GIM_1153	CUT_GIM_1153	chrIV	1242725	1243176	+	CUT_GIM_RNA	CUT
CUT_GIM_1235	CUT_GIM_1235	CUT_GIM_1235	chrIV	930273	930472	-	CUT_GIM_RNA	CUT
CUT_GIM_0803	CUT_GIM_0803	CUT_GIM_0803	chrXII	230878	231270	+	CUT_GIM_RNA	CUT
CUT_GIM_0125	CUT_GIM_0125	CUT_GIM_0125	chrII	257946	257960	-	CUT_GIM_RNA	CUT
CUT_GIM_0744	CUT_GIM_0744	CUT_GIM_0744	chrIX	160599	160750	-	CUT_GIM_RNA	CUT
CUT_GIM_0710	CUT_GIM_0710	CUT_GIM_0710	chrIX	274069	274333	+	CUT_GIM_RNA	CUT
CUT_GIM_0333	CUT_GIM_0333	CUT_GIM_0333	chrXVI	338988	339380	-	CUT_GIM_RNA	CUT
CUT_GIM_0449	CUT_GIM_0449	CUT_GIM_0449	chrVII	114959	115267	+	CUT_GIM_RNA	CUT
CUT_GIM_0973	CUT_GIM_0973	CUT_GIM_0973	chrIII	120109	120310	+	CUT_GIM_RNA	CUT
CUT_GIM_0689	CUT_GIM_0689	CUT_GIM_0689	chrXV	109007	109181	-	CUT_GIM_RNA	CUT
CUT_GIM_0225	CUT_GIM_0225	CUT_GIM_0225	chrXIV	154525	154862	-	CUT_GIM_RNA	CUT
CUT_GIM_0088	CUT_GIM_0088	CUT_GIM_0088	chrII	679445	679593	+	CUT_GIM_RNA	CUT
CUT_GIM_0094	CUT_GIM_0094	CUT_GIM_0094	chrII	614519	614855	+	CUT_GIM_RNA	CUT
CUT_GIM_1054	CUT_GIM_1054	CUT_GIM_1054	chrX	79600	79867	-	CUT_GIM_RNA	CUT
CUT_GIM_1192	CUT_GIM_1192	CUT_GIM_1192	chrIV	1012935	1013720	-	CUT_GIM_RNA	CUT
CUT_GIM_0084	CUT_GIM_0084	CUT_GIM_0084	chrII	321807	321955	+	CUT_GIM_RNA	CUT
CUT_GIM_0080	CUT_GIM_0080	CUT_GIM_0080	chrII	423495	423697	+	CUT_GIM_RNA	CUT
CUT_GIM_0386	CUT_GIM_0386	CUT_GIM_0386	chrXI	589774	590112	+	CUT_GIM_RNA	CUT
CUT_GIM_0284	CUT_GIM_0284	CUT_GIM_0284	chrXVI	732394	732764	+	CUT_GIM_RNA	CUT
CUT_GIM_0776	CUT_GIM_0776	CUT_GIM_0776	chrXII	46668	47286	+	CUT_GIM_RNA	CUT
CUT_GIM_0969	CUT_GIM_0969	CUT_GIM_0969	chrIII	299558	299623	+	CUT_GIM_RNA	CUT
CUT_GIM_0976	CUT_GIM_0976	CUT_GIM_0976	chrIII	151925	152582	+	CUT_GIM_RNA	CUT
CUT_GIM_1246	CUT_GIM_1246	CUT_GIM_1246	chrI	180240	180557	+	CUT_GIM_RNA	CUT
CUT_GIM_0148	CUT_GIM_0148	CUT_GIM_0148	chrII	40168	40555	-	CUT_GIM_RNA	CUT
CUT_GIM_0516	CUT_GIM_0516	CUT_GIM_0516	chrVII	165300	165881	+	CUT_GIM_RNA	CUT
CUT_GIM_0642	CUT_GIM_0642	CUT_GIM_0642	chrXV	161049	161213	+	CUT_GIM_RNA	CUT
CUT_GIM_0580	CUT_GIM_0580	CUT_GIM_0580	chrVII	1064943	1065199	-	CUT_GIM_RNA	CUT
CUT_GIM_0569	CUT_GIM_0569	CUT_GIM_0569	chrVII	412766	413140	-	CUT_GIM_RNA	CUT
CUT_GIM_1072	CUT_GIM_1072	CUT_GIM_1072	chrX	219976	220688	-	CUT_GIM_RNA	CUT
CUT_GIM_0906	CUT_GIM_0906	CUT_GIM_0906	chrXIII	874242	874556	-	CUT_GIM_RNA	CUT
CUT_GIM_0069	CUT_GIM_0069	CUT_GIM_0069	chrV	211838	211991	-	CUT_GIM_RNA	CUT
CUT_GIM_0039	CUT_GIM_0039	CUT_GIM_0039	chrV	349334	349676	-	CUT_GIM_RNA	CUT
CUT_GIM_0002	CUT_GIM_0002	CUT_GIM_0002	chrV	438890	439312	+	CUT_GIM_RNA	CUT
CUT_GIM_0983	CUT_GIM_0983	CUT_GIM_0983	chrIII	82640	82837	-	CUT_GIM_RNA	CUT
CUT_GIM_0335	CUT_GIM_0335	CUT_GIM_0335	chrXVI	105646	105936	-	CUT_GIM_RNA	CUT
CUT_GIM_0947	CUT_GIM_0947	CUT_GIM_0947	chrXIII	759907	760148	-	CUT_GIM_RNA	CUT
CUT_GIM_0270	CUT_GIM_0270	CUT_GIM_0270	chrXVI	363892	364437	+	CUT_GIM_RNA	CUT
CUT_GIM_0822	CUT_GIM_0822	CUT_GIM_0822	chrXII	208292	208521	-	CUT_GIM_RNA	CUT
CUT_GIM_1281	CUT_GIM_1281	CUT_GIM_1281	chrVIII	102239	102521	+	CUT_GIM_RNA	CUT
CUT_GIM_0074	CUT_GIM_0074	CUT_GIM_0074	chrII	460642	460800	+	CUT_GIM_RNA	CUT
CUT_GIM_0422	CUT_GIM_0422	CUT_GIM_0422	chrXI	324654	325037	-	CUT_GIM_RNA	CUT
CUT_GIM_0725	CUT_GIM_0725	CUT_GIM_0725	chrIX	415026	415217	+	CUT_GIM_RNA	CUT
CUT_GIM_1234	CUT_GIM_1234	CUT_GIM_1234	chrIV	21471	22458	-	CUT_GIM_RNA	CUT
CUT_GIM_1181	CUT_GIM_1181	CUT_GIM_1181	chrIV	398987	399122	-	CUT_GIM_RNA	CUT
CUT_GIM_1303	CUT_GIM_1303	CUT_GIM_1303	chrVIII	487247	487498	-	CUT_GIM_RNA	CUT
CUT_GIM_0939	CUT_GIM_0939	CUT_GIM_0939	chrXIII	513874	513932	-	CUT_GIM_RNA	CUT
CUT_GIM_0637	CUT_GIM_0637	CUT_GIM_0637	chrXV	315658	316519	+	CUT_GIM_RNA	CUT
CUT_GIM_0217	CUT_GIM_0217	CUT_GIM_0217	chrXIV	89565	89892	-	CUT_GIM_RNA	CUT
CUT_GIM_0292	CUT_GIM_0292	CUT_GIM_0292	chrXVI	856458	857558	+	CUT_GIM_RNA	CUT
CUT_GIM_1311	CUT_GIM_1311	CUT_GIM_1311	chrVIII	335991	336178	-	CUT_GIM_RNA	CUT
CUT_GIM_0149	CUT_GIM_0149	CUT_GIM_0149	chrII	449005	449306	-	CUT_GIM_RNA	CUT
CUT_GIM_0230	CUT_GIM_0230	CUT_GIM_0230	chrXIV	559661	559878	-	CUT_GIM_RNA	CUT
CUT_GIM_0201	CUT_GIM_0201	CUT_GIM_0201	chrXIV	763439	763987	+	CUT_GIM_RNA	CUT
CUT_GIM_0792	CUT_GIM_0792	CUT_GIM_0792	chrXII	39782	40021	+	CUT_GIM_RNA	CUT
CUT_GIM_0719	CUT_GIM_0719	CUT_GIM_0719	chrIX	258633	258888	+	CUT_GIM_RNA	CUT
CUT_GIM_0130	CUT_GIM_0130	CUT_GIM_0130	chrII	331944	332398	-	CUT_GIM_RNA	CUT
CUT_GIM_0742	CUT_GIM_0742	CUT_GIM_0742	chrIX	129480	129795	-	CUT_GIM_RNA	CUT
CUT_GIM_0072	CUT_GIM_0072	CUT_GIM_0072	chrV	452606	453130	-	CUT_GIM_RNA	CUT
CUT_GIM_0543	CUT_GIM_0543	CUT_GIM_0543	chrVII	801575	801751	-	CUT_GIM_RNA	CUT
CUT_GIM_0818	CUT_GIM_0818	CUT_GIM_0818	chrXII	877577	877644	-	CUT_GIM_RNA	CUT
CUT_GIM_0652	CUT_GIM_0652	CUT_GIM_0652	chrXV	39939	40302	-	CUT_GIM_RNA	CUT
CUT_GIM_0492	CUT_GIM_0492	CUT_GIM_0492	chrVII	618050	618320	+	CUT_GIM_RNA	CUT
CUT_GIM_0081	CUT_GIM_0081	CUT_GIM_0081	chrII	474388	474519	+	CUT_GIM_RNA	CUT
CUT_GIM_0097	CUT_GIM_0097	CUT_GIM_0097	chrII	360688	361037	+	CUT_GIM_RNA	CUT
CUT_GIM_0631	CUT_GIM_0631	CUT_GIM_0631	chrXV	418163	418793	+	CUT_GIM_RNA	CUT
CUT_GIM_0574	CUT_GIM_0574	CUT_GIM_0574	chrVII	208356	208621	-	CUT_GIM_RNA	CUT
CUT_GIM_0790	CUT_GIM_0790	CUT_GIM_0790	chrXII	201647	201808	+	CUT_GIM_RNA	CUT
CUT_GIM_0621	CUT_GIM_0621	CUT_GIM_0621	chrXV	1064602	1064771	+	CUT_GIM_RNA	CUT
CUT_GIM_0517	CUT_GIM_0517	CUT_GIM_0517	chrVII	166789	166909	+	CUT_GIM_RNA	CUT
CUT_GIM_0119	CUT_GIM_0119	CUT_GIM_0119	chrII	235653	236011	-	CUT_GIM_RNA	CUT
CUT_GIM_0965	CUT_GIM_0965	CUT_GIM_0965	chrIII	131790	132134	+	CUT_GIM_RNA	CUT
CUT_GIM_0518	CUT_GIM_0518	CUT_GIM_0518	chrVII	165633	166542	-	CUT_GIM_RNA	CUT
CUT_GIM_0263	CUT_GIM_0263	CUT_GIM_0263	chrXVI	169700	170326	+	CUT_GIM_RNA	CUT
CUT_GIM_0299	CUT_GIM_0299	CUT_GIM_0299	chrXVI	856458	856955	+	CUT_GIM_RNA	CUT
CUT_GIM_1202	CUT_GIM_1202	CUT_GIM_1202	chrIV	599315	599631	-	CUT_GIM_RNA	CUT
CUT_GIM_0494	CUT_GIM_0494	CUT_GIM_0494	chrVII	766667	767319	+	CUT_GIM_RNA	CUT
CUT_GIM_0452	CUT_GIM_0452	CUT_GIM_0452	chrVII	284156	284257	+	CUT_GIM_RNA	CUT
CUT_GIM_1309	CUT_GIM_1309	CUT_GIM_1309	chrVIII	241897	242323	-	CUT_GIM_RNA	CUT
CUT_GIM_0200	CUT_GIM_0200	CUT_GIM_0200	chrXIV	529471	530126	+	CUT_GIM_RNA	CUT
CUT_GIM_0845	CUT_GIM_0845	CUT_GIM_0845	chrXII	827859	828006	-	CUT_GIM_RNA	CUT
CUT_GIM_0198	CUT_GIM_0198	CUT_GIM_0198	chrXIV	546259	547006	+	CUT_GIM_RNA	CUT
CUT_GIM_0625	CUT_GIM_0625	CUT_GIM_0625	chrXV	168320	168520	+	CUT_GIM_RNA	CUT
CUT_GIM_0329	CUT_GIM_0329	CUT_GIM_0329	chrXVI	472226	472893	-	CUT_GIM_RNA	CUT
CUT_GIM_0290	CUT_GIM_0290	CUT_GIM_0290	chrXVI	373577	374100	+	CUT_GIM_RNA	CUT
CUT_GIM_0140	CUT_GIM_0140	CUT_GIM_0140	chrII	341243	341326	-	CUT_GIM_RNA	CUT
CUT_GIM_1063	CUT_GIM_1063	CUT_GIM_1063	chrX	466097	466293	-	CUT_GIM_RNA	CUT
CUT_GIM_0886	CUT_GIM_0886	CUT_GIM_0886	chrXIII	13480	13768	+	CUT_GIM_RNA	CUT
CUT_GIM_0542	CUT_GIM_0542	CUT_GIM_0542	chrVII	35238	35349	-	CUT_GIM_RNA	CUT
CUT_GIM_1172	CUT_GIM_1172	CUT_GIM_1172	chrIV	1249802	1250037	-	CUT_GIM_RNA	CUT
CUT_GIM_0777	CUT_GIM_0777	CUT_GIM_0777	chrXII	795436	795593	+	CUT_GIM_RNA	CUT
CUT_GIM_0411	CUT_GIM_0411	CUT_GIM_0411	chrXI	580452	580522	+	CUT_GIM_RNA	CUT
CUT_GIM_0823	CUT_GIM_0823	CUT_GIM_0823	chrXII	346918	347251	-	CUT_GIM_RNA	CUT
CUT_GIM_0326	CUT_GIM_0326	CUT_GIM_0326	chrXVI	930079	930140	-	CUT_GIM_RNA	CUT
CUT_GIM_1160	CUT_GIM_1160	CUT_GIM_1160	chrIV	330713	331188	+	CUT_GIM_RNA	CUT
CUT_GIM_0763	CUT_GIM_0763	CUT_GIM_0763	chrXII	156586	156949	+	CUT_GIM_RNA	CUT
CUT_GIM_0972	CUT_GIM_0972	CUT_GIM_0972	chrIII	164017	164274	+	CUT_GIM_RNA	CUT
CUT_GIM_1145	CUT_GIM_1145	CUT_GIM_1145	chrIV	334132	334490	+	CUT_GIM_RNA	CUT
CUT_GIM_0126	CUT_GIM_0126	CUT_GIM_0126	chrII	171038	171283	-	CUT_GIM_RNA	CUT
CUT_GIM_1261	CUT_GIM_1261	CUT_GIM_1261	chrVIII	149227	149522	+	CUT_GIM_RNA	CUT
CUT_GIM_0993	CUT_GIM_0993	CUT_GIM_0993	chrX	613244	613641	+	CUT_GIM_RNA	CUT
CUT_GIM_0068	CUT_GIM_0068	CUT_GIM_0068	chrV	45809	45927	-	CUT_GIM_RNA	CUT
CUT_GIM_1286	CUT_GIM_1286	CUT_GIM_1286	chrVIII	516489	517272	-	CUT_GIM_RNA	CUT
CUT_GIM_0138	CUT_GIM_0138	CUT_GIM_0138	chrII	613831	614032	-	CUT_GIM_RNA	CUT
CUT_GIM_0398	CUT_GIM_0398	CUT_GIM_0398	chrXI	517584	517656	+	CUT_GIM_RNA	CUT
CUT_GIM_0797	CUT_GIM_0797	CUT_GIM_0797	chrXII	196800	197213	+	CUT_GIM_RNA	CUT
CUT_GIM_0381	CUT_GIM_0381	CUT_GIM_0381	chrXI	11719	12052	+	CUT_GIM_RNA	CUT
CUT_GIM_1155	CUT_GIM_1155	CUT_GIM_1155	chrIV	366593	366835	+	CUT_GIM_RNA	CUT
CUT_GIM_0350	CUT_GIM_0350	CUT_GIM_0350	chrXVI	878200	878495	-	CUT_GIM_RNA	CUT
CUT_GIM_0733	CUT_GIM_0733	CUT_GIM_0733	chrIX	258709	258717	-	CUT_GIM_RNA	CUT
CUT_GIM_1154	CUT_GIM_1154	CUT_GIM_1154	chrIV	1072748	1073266	+	CUT_GIM_RNA	CUT
CUT_GIM_0347	CUT_GIM_0347	CUT_GIM_0347	chrXVI	190946	191199	-	CUT_GIM_RNA	CUT
CUT_GIM_0179	CUT_GIM_0179	CUT_GIM_0179	chrXIV	19547	19978	+	CUT_GIM_RNA	CUT
CUT_GIM_0692	CUT_GIM_0692	CUT_GIM_0692	chrXV	255826	256413	-	CUT_GIM_RNA	CUT
CUT_GIM_0288	CUT_GIM_0288	CUT_GIM_0288	chrXVI	641935	642121	+	CUT_GIM_RNA	CUT
CUT_GIM_0306	CUT_GIM_0306	CUT_GIM_0306	chrXVI	73735	74228	+	CUT_GIM_RNA	CUT
CUT_GIM_0417	CUT_GIM_0417	CUT_GIM_0417	chrXI	613778	614138	-	CUT_GIM_RNA	CUT
CUT_GIM_0458	CUT_GIM_0458	CUT_GIM_0458	chrVII	1026337	1026414	+	CUT_GIM_RNA	CUT
CUT_GIM_1119	CUT_GIM_1119	CUT_GIM_1119	chrIV	50078	50996	+	CUT_GIM_RNA	CUT
CUT_GIM_0778	CUT_GIM_0778	CUT_GIM_0778	chrXII	157990	158137	+	CUT_GIM_RNA	CUT
CUT_GIM_0085	CUT_GIM_0085	CUT_GIM_0085	chrII	576327	576676	+	CUT_GIM_RNA	CUT
CUT_GIM_0454	CUT_GIM_0454	CUT_GIM_0454	chrVII	806325	806503	+	CUT_GIM_RNA	CUT
CUT_GIM_1253	CUT_GIM_1253	CUT_GIM_1253	chrI	136637	136707	-	CUT_GIM_RNA	CUT
CUT_GIM_0731	CUT_GIM_0731	CUT_GIM_0731	chrIX	177294	177428	-	CUT_GIM_RNA	CUT
CUT_GIM_0174	CUT_GIM_0174	CUT_GIM_0174	chrVI	251965	252269	-	CUT_GIM_RNA	CUT
CUT_GIM_0249	CUT_GIM_0249	CUT_GIM_0249	chrXIV	691421	692068	-	CUT_GIM_RNA	CUT
CUT_GIM_0122	CUT_GIM_0122	CUT_GIM_0122	chrII	788122	788739	-	CUT_GIM_RNA	CUT
CUT_GIM_0622	CUT_GIM_0622	CUT_GIM_0622	chrXV	675420	675908	+	CUT_GIM_RNA	CUT
CUT_GIM_0980	CUT_GIM_0980	CUT_GIM_0980	chrIII	298609	298843	-	CUT_GIM_RNA	CUT
CUT_GIM_1223	CUT_GIM_1223	CUT_GIM_1223	chrIV	139169	139357	-	CUT_GIM_RNA	CUT
CUT_GIM_0673	CUT_GIM_0673	CUT_GIM_0673	chrXV	891442	891642	-	CUT_GIM_RNA	CUT
CUT_GIM_1084	CUT_GIM_1084	CUT_GIM_1084	chrX	140013	140110	-	CUT_GIM_RNA	CUT
CUT_GIM_0867	CUT_GIM_0867	CUT_GIM_0867	chrXIII	348540	349060	+	CUT_GIM_RNA	CUT
CUT_GIM_1141	CUT_GIM_1141	CUT_GIM_1141	chrIV	34301	34656	+	CUT_GIM_RNA	CUT
CUT_GIM_0369	CUT_GIM_0369	CUT_GIM_0369	chrXVI	480104	480360	-	CUT_GIM_RNA	CUT
CUT_GIM_0721	CUT_GIM_0721	CUT_GIM_0721	chrIX	247572	247887	+	CUT_GIM_RNA	CUT
CUT_GIM_0168	CUT_GIM_0168	CUT_GIM_0168	chrVI	204674	204822	-	CUT_GIM_RNA	CUT
CUT_GIM_0412	CUT_GIM_0412	CUT_GIM_0412	chrXI	386434	387236	-	CUT_GIM_RNA	CUT
CUT_GIM_0144	CUT_GIM_0144	CUT_GIM_0144	chrII	477253	477356	-	CUT_GIM_RNA	CUT
CUT_GIM_0006	CUT_GIM_0006	CUT_GIM_0006	chrV	491489	492191	+	CUT_GIM_RNA	CUT
CUT_GIM_0767	CUT_GIM_0767	CUT_GIM_0767	chrXII	805724	805920	+	CUT_GIM_RNA	CUT
CUT_GIM_1056	CUT_GIM_1056	CUT_GIM_1056	chrX	450467	450688	-	CUT_GIM_RNA	CUT
CUT_GIM_0457	CUT_GIM_0457	CUT_GIM_0457	chrVII	95733	95892	+	CUT_GIM_RNA	CUT
CUT_GIM_0389	CUT_GIM_0389	CUT_GIM_0389	chrXI	269675	270663	+	CUT_GIM_RNA	CUT
CUT_GIM_0934	CUT_GIM_0934	CUT_GIM_0934	chrXIII	731456	732121	-	CUT_GIM_RNA	CUT
CUT_GIM_0578	CUT_GIM_0578	CUT_GIM_0578	chrVII	883708	883947	-	CUT_GIM_RNA	CUT
CUT_GIM_1092	CUT_GIM_1092	CUT_GIM_1092	chrIV	974889	974980	+	CUT_GIM_RNA	CUT
CUT_GIM_0359	CUT_GIM_0359	CUT_GIM_0359	chrXVI	445115	445395	-	CUT_GIM_RNA	CUT
CUT_GIM_0497	CUT_GIM_0497	CUT_GIM_0497	chrVII	798411	798586	+	CUT_GIM_RNA	CUT
CUT_GIM_0376	CUT_GIM_0376	CUT_GIM_0376	chrXI	604449	604533	+	CUT_GIM_RNA	CUT
CUT_GIM_0317	CUT_GIM_0317	CUT_GIM_0317	chrXVI	901256	901548	-	CUT_GIM_RNA	CUT
CUT_GIM_0738	CUT_GIM_0738	CUT_GIM_0738	chrIX	315712	316243	-	CUT_GIM_RNA	CUT
CUT_GIM_0401	CUT_GIM_0401	CUT_GIM_0401	chrXI	200447	200537	+	CUT_GIM_RNA	CUT
CUT_GIM_0451	CUT_GIM_0451	CUT_GIM_0451	chrVII	272365	272480	+	CUT_GIM_RNA	CUT
CUT_GIM_0629	CUT_GIM_0629	CUT_GIM_0629	chrXV	578433	578640	+	CUT_GIM_RNA	CUT
CUT_GIM_0599	CUT_GIM_0599	CUT_GIM_0599	chrXV	667647	667757	+	CUT_GIM_RNA	CUT
CUT_GIM_0142	CUT_GIM_0142	CUT_GIM_0142	chrII	539479	539745	-	CUT_GIM_RNA	CUT
CUT_GIM_0336	CUT_GIM_0336	CUT_GIM_0336	chrXVI	685359	685661	-	CUT_GIM_RNA	CUT
CUT_GIM_0101	CUT_GIM_0101	CUT_GIM_0101	chrII	376361	376794	+	CUT_GIM_RNA	CUT
CUT_GIM_0248	CUT_GIM_0248	CUT_GIM_0248	chrXIV	87004	87189	-	CUT_GIM_RNA	CUT
CUT_GIM_0511	CUT_GIM_0511	CUT_GIM_0511	chrVII	637032	637373	+	CUT_GIM_RNA	CUT
CUT_GIM_0404	CUT_GIM_0404	CUT_GIM_0404	chrXI	145893	146087	+	CUT_GIM_RNA	CUT
CUT_GIM_0408	CUT_GIM_0408	CUT_GIM_0408	chrXI	169054	169207	+	CUT_GIM_RNA	CUT
CUT_GIM_0605	CUT_GIM_0605	CUT_GIM_0605	chrXV	471852	471934	+	CUT_GIM_RNA	CUT
CUT_GIM_0570	CUT_GIM_0570	CUT_GIM_0570	chrVII	454245	454550	-	CUT_GIM_RNA	CUT
CUT_GIM_1224	CUT_GIM_1224	CUT_GIM_1224	chrIV	300963	301886	-	CUT_GIM_RNA	CUT
CUT_GIM_0141	CUT_GIM_0141	CUT_GIM_0141	chrII	391124	391542	-	CUT_GIM_RNA	CUT
CUT_GIM_1214	CUT_GIM_1214	CUT_GIM_1214	chrIV	229246	229466	-	CUT_GIM_RNA	CUT
CUT_GIM_0650	CUT_GIM_0650	CUT_GIM_0650	chrXV	324412	324631	-	CUT_GIM_RNA	CUT
CUT_GIM_1067	CUT_GIM_1067	CUT_GIM_1067	chrX	316986	317460	-	CUT_GIM_RNA	CUT
CUT_GIM_0234	CUT_GIM_0234	CUT_GIM_0234	chrXIV	636471	636757	-	CUT_GIM_RNA	CUT
CUT_GIM_1312	CUT_GIM_1312	CUT_GIM_1312	chrVIII	98680	98872	-	CUT_GIM_RNA	CUT
CUT_GIM_0714	CUT_GIM_0714	CUT_GIM_0714	chrIX	92975	93223	+	CUT_GIM_RNA	CUT
CUT_GIM_0075	CUT_GIM_0075	CUT_GIM_0075	chrII	392819	393003	+	CUT_GIM_RNA	CUT
CUT_GIM_0548	CUT_GIM_0548	CUT_GIM_0548	chrVII	746290	746554	-	CUT_GIM_RNA	CUT
CUT_GIM_0383	CUT_GIM_0383	CUT_GIM_0383	chrXI	611226	611296	+	CUT_GIM_RNA	CUT
CUT_GIM_1062	CUT_GIM_1062	CUT_GIM_1062	chrX	393520	393682	-	CUT_GIM_RNA	CUT
CUT_GIM_1120	CUT_GIM_1120	CUT_GIM_1120	chrIV	616637	617013	+	CUT_GIM_RNA	CUT
CUT_GIM_0541	CUT_GIM_0541	CUT_GIM_0541	chrVII	761509	762182	-	CUT_GIM_RNA	CUT
CUT_GIM_0368	CUT_GIM_0368	CUT_GIM_0368	chrXVI	681199	681983	-	CUT_GIM_RNA	CUT
CUT_GIM_0469	CUT_GIM_0469	CUT_GIM_0469	chrVII	739953	739959	+	CUT_GIM_RNA	CUT
CUT_GIM_1134	CUT_GIM_1134	CUT_GIM_1134	chrIV	506326	506922	+	CUT_GIM_RNA	CUT
CUT_GIM_1163	CUT_GIM_1163	CUT_GIM_1163	chrIV	870411	870615	-	CUT_GIM_RNA	CUT
CUT_GIM_0271	CUT_GIM_0271	CUT_GIM_0271	chrXVI	472239	472472	+	CUT_GIM_RNA	CUT
CUT_GIM_1307	CUT_GIM_1307	CUT_GIM_1307	chrVIII	279523	280255	-	CUT_GIM_RNA	CUT
CUT_GIM_0954	CUT_GIM_0954	CUT_GIM_0954	chrXIII	45549	46589	-	CUT_GIM_RNA	CUT
CUT_GIM_0587	CUT_GIM_0587	CUT_GIM_0587	chrVII	1049980	1050152	-	CUT_GIM_RNA	CUT
CUT_GIM_0434	CUT_GIM_0434	CUT_GIM_0434	chrXI	257632	258495	-	CUT_GIM_RNA	CUT
CUT_GIM_0415	CUT_GIM_0415	CUT_GIM_0415	chrXI	96002	96270	-	CUT_GIM_RNA	CUT
CUT_GIM_0606	CUT_GIM_0606	CUT_GIM_0606	chrXV	110201	111012	+	CUT_GIM_RNA	CUT
CUT_GIM_0816	CUT_GIM_0816	CUT_GIM_0816	chrXII	781315	781496	-	CUT_GIM_RNA	CUT
CUT_GIM_0040	CUT_GIM_0040	CUT_GIM_0040	chrV	509719	509884	-	CUT_GIM_RNA	CUT
CUT_GIM_0079	CUT_GIM_0079	CUT_GIM_0079	chrII	339570	339853	+	CUT_GIM_RNA	CUT
CUT_GIM_1283	CUT_GIM_1283	CUT_GIM_1283	chrVIII	10753	10994	-	CUT_GIM_RNA	CUT
CUT_GIM_0115	CUT_GIM_0115	CUT_GIM_0115	chrII	716755	716925	+	CUT_GIM_RNA	CUT
CUT_GIM_0252	CUT_GIM_0252	CUT_GIM_0252	chrXIV	300835	301641	-	CUT_GIM_RNA	CUT
CUT_GIM_0246	CUT_GIM_0246	CUT_GIM_0246	chrXIV	458842	459445	-	CUT_GIM_RNA	CUT
CUT_GIM_0851	CUT_GIM_0851	CUT_GIM_0851	chrXII	906721	906862	-	CUT_GIM_RNA	CUT
CUT_GIM_0048	CUT_GIM_0048	CUT_GIM_0048	chrV	511794	512243	-	CUT_GIM_RNA	CUT
CUT_GIM_0829	CUT_GIM_0829	CUT_GIM_0829	chrXII	373548	374194	-	CUT_GIM_RNA	CUT
CUT_GIM_1201	CUT_GIM_1201	CUT_GIM_1201	chrIV	769809	770253	-	CUT_GIM_RNA	CUT
CUT_GIM_0693	CUT_GIM_0693	CUT_GIM_0693	chrXV	631640	631764	-	CUT_GIM_RNA	CUT
CUT_GIM_1295	CUT_GIM_1295	CUT_GIM_1295	chrVIII	381099	381306	-	CUT_GIM_RNA	CUT
CUT_GIM_0269	CUT_GIM_0269	CUT_GIM_0269	chrXVI	207458	208148	+	CUT_GIM_RNA	CUT
CUT_GIM_0691	CUT_GIM_0691	CUT_GIM_0691	chrXV	903477	903650	-	CUT_GIM_RNA	CUT
CUT_GIM_0104	CUT_GIM_0104	CUT_GIM_0104	chrII	571410	571743	+	CUT_GIM_RNA	CUT
CUT_GIM_1010	CUT_GIM_1010	CUT_GIM_1010	chrX	180566	180920	+	CUT_GIM_RNA	CUT
CUT_GIM_1140	CUT_GIM_1140	CUT_GIM_1140	chrIV	357429	357983	+	CUT_GIM_RNA	CUT
CUT_GIM_1008	CUT_GIM_1008	CUT_GIM_1008	chrX	524842	524978	+	CUT_GIM_RNA	CUT
CUT_GIM_1068	CUT_GIM_1068	CUT_GIM_1068	chrX	146235	146857	-	CUT_GIM_RNA	CUT
CUT_GIM_0114	CUT_GIM_0114	CUT_GIM_0114	chrII	420004	420170	+	CUT_GIM_RNA	CUT
CUT_GIM_0202	CUT_GIM_0202	CUT_GIM_0202	chrXIV	424825	424917	+	CUT_GIM_RNA	CUT
CUT_GIM_0444	CUT_GIM_0444	CUT_GIM_0444	chrVII	74490	74790	+	CUT_GIM_RNA	CUT
CUT_GIM_0385	CUT_GIM_0385	CUT_GIM_0385	chrXI	269675	270234	+	CUT_GIM_RNA	CUT
CUT_GIM_0610	CUT_GIM_0610	CUT_GIM_0610	chrXV	761546	761772	+	CUT_GIM_RNA	CUT
CUT_GIM_0588	CUT_GIM_0588	CUT_GIM_0588	chrVII	702149	702668	-	CUT_GIM_RNA	CUT
CUT_GIM_0537	CUT_GIM_0537	CUT_GIM_0537	chrVII	830581	830983	-	CUT_GIM_RNA	CUT
CUT_GIM_0811	CUT_GIM_0811	CUT_GIM_0811	chrXII	793176	793851	+	CUT_GIM_RNA	CUT
CUT_GIM_0520	CUT_GIM_0520	CUT_GIM_0520	chrVII	528465	528969	-	CUT_GIM_RNA	CUT
CUT_GIM_0751	CUT_GIM_0751	CUT_GIM_0751	chrXII	300398	300928	+	CUT_GIM_RNA	CUT
CUT_GIM_0321	CUT_GIM_0321	CUT_GIM_0321	chrXVI	801814	801953	-	CUT_GIM_RNA	CUT
CUT_GIM_0232	CUT_GIM_0232	CUT_GIM_0232	chrXIV	707248	707559	-	CUT_GIM_RNA	CUT
CUT_GIM_0646	CUT_GIM_0646	CUT_GIM_0646	chrXV	802502	802558	+	CUT_GIM_RNA	CUT
CUT_GIM_0904	CUT_GIM_0904	CUT_GIM_0904	chrXIII	494893	494972	+	CUT_GIM_RNA	CUT
CUT_GIM_1093	CUT_GIM_1093	CUT_GIM_1093	chrIV	1030509	1030792	+	CUT_GIM_RNA	CUT
CUT_GIM_0392	CUT_GIM_0392	CUT_GIM_0392	chrXI	556524	557429	+	CUT_GIM_RNA	CUT
CUT_GIM_1047	CUT_GIM_1047	CUT_GIM_1047	chrX	454507	454953	-	CUT_GIM_RNA	CUT
CUT_GIM_0840	CUT_GIM_0840	CUT_GIM_0840	chrXII	541508	542422	-	CUT_GIM_RNA	CUT
CUT_GIM_0273	CUT_GIM_0273	CUT_GIM_0273	chrXVI	40848	41114	+	CUT_GIM_RNA	CUT
CUT_GIM_1221	CUT_GIM_1221	CUT_GIM_1221	chrIV	363421	364040	-	CUT_GIM_RNA	CUT
CUT_GIM_0593	CUT_GIM_0593	CUT_GIM_0593	chrXV	1008778	1009265	+	CUT_GIM_RNA	CUT
CUT_GIM_1058	CUT_GIM_1058	CUT_GIM_1058	chrX	639910	640573	-	CUT_GIM_RNA	CUT
CUT_GIM_0447	CUT_GIM_0447	CUT_GIM_0447	chrVII	417492	417836	+	CUT_GIM_RNA	CUT
CUT_GIM_0005	CUT_GIM_0005	CUT_GIM_0005	chrV	268810	269466	+	CUT_GIM_RNA	CUT
CUT_GIM_0597	CUT_GIM_0597	CUT_GIM_0597	chrXV	202698	202892	+	CUT_GIM_RNA	CUT
CUT_GIM_0208	CUT_GIM_0208	CUT_GIM_0208	chrXIV	174929	175341	+	CUT_GIM_RNA	CUT
CUT_GIM_0011	CUT_GIM_0011	CUT_GIM_0011	chrV	258293	258609	+	CUT_GIM_RNA	CUT
CUT_GIM_0196	CUT_GIM_0196	CUT_GIM_0196	chrXIV	234215	234424	+	CUT_GIM_RNA	CUT
CUT_GIM_0551	CUT_GIM_0551	CUT_GIM_0551	chrVII	615989	616129	-	CUT_GIM_RNA	CUT
CUT_GIM_0491	CUT_GIM_0491	CUT_GIM_0491	chrVII	559202	559434	+	CUT_GIM_RNA	CUT
CUT_GIM_1241	CUT_GIM_1241	CUT_GIM_1241	chrI	34664	34880	+	CUT_GIM_RNA	CUT
CUT_GIM_0658	CUT_GIM_0658	CUT_GIM_0658	chrXV	371085	371366	-	CUT_GIM_RNA	CUT
CUT_GIM_0486	CUT_GIM_0486	CUT_GIM_0486	chrVII	859820	860039	+	CUT_GIM_RNA	CUT
CUT_GIM_0155	CUT_GIM_0155	CUT_GIM_0155	chrVI	114887	115107	+	CUT_GIM_RNA	CUT
CUT_GIM_1012	CUT_GIM_1012	CUT_GIM_1012	chrX	129186	129594	+	CUT_GIM_RNA	CUT
CUT_GIM_0157	CUT_GIM_0157	CUT_GIM_0157	chrVI	173618	173770	+	CUT_GIM_RNA	CUT
CUT_GIM_0139	CUT_GIM_0139	CUT_GIM_0139	chrII	291785	292036	-	CUT_GIM_RNA	CUT
CUT_GIM_0070	CUT_GIM_0070	CUT_GIM_0070	chrV	337527	337684	-	CUT_GIM_RNA	CUT
CUT_GIM_1147	CUT_GIM_1147	CUT_GIM_1147	chrIV	950540	950642	+	CUT_GIM_RNA	CUT
CUT_GIM_0103	CUT_GIM_0103	CUT_GIM_0103	chrII	326329	326878	+	CUT_GIM_RNA	CUT
CUT_GIM_0525	CUT_GIM_0525	CUT_GIM_0525	chrVII	761999	762182	-	CUT_GIM_RNA	CUT
CUT_GIM_0697	CUT_GIM_0697	CUT_GIM_0697	chrXV	353681	353899	-	CUT_GIM_RNA	CUT
CUT_GIM_1091	CUT_GIM_1091	CUT_GIM_1091	chrIV	465546	465666	+	CUT_GIM_RNA	CUT
CUT_GIM_0210	CUT_GIM_0210	CUT_GIM_0210	chrXIV	10420	10609	+	CUT_GIM_RNA	CUT
CUT_GIM_0355	CUT_GIM_0355	CUT_GIM_0355	chrXVI	411230	411682	-	CUT_GIM_RNA	CUT
CUT_GIM_0915	CUT_GIM_0915	CUT_GIM_0915	chrXIII	275605	275735	-	CUT_GIM_RNA	CUT
CUT_GIM_0372	CUT_GIM_0372	CUT_GIM_0372	chrXVI	132342	132866	-	CUT_GIM_RNA	CUT
CUT_GIM_0609	CUT_GIM_0609	CUT_GIM_0609	chrXV	1003928	1004587	+	CUT_GIM_RNA	CUT
CUT_GIM_0711	CUT_GIM_0711	CUT_GIM_0711	chrIX	212156	212384	+	CUT_GIM_RNA	CUT
CUT_GIM_0099	CUT_GIM_0099	CUT_GIM_0099	chrII	209220	209491	+	CUT_GIM_RNA	CUT
CUT_GIM_0117	CUT_GIM_0117	CUT_GIM_0117	chrII	101120	101234	-	CUT_GIM_RNA	CUT
CUT_GIM_1087	CUT_GIM_1087	CUT_GIM_1087	chrX	620115	620197	-	CUT_GIM_RNA	CUT
CUT_GIM_1236	CUT_GIM_1236	CUT_GIM_1236	chrIV	602595	603219	-	CUT_GIM_RNA	CUT
CUT_GIM_0945	CUT_GIM_0945	CUT_GIM_0945	chrXIII	545373	545702	-	CUT_GIM_RNA	CUT
CUT_GIM_1115	CUT_GIM_1115	CUT_GIM_1115	chrIV	501825	502447	+	CUT_GIM_RNA	CUT
CUT_GIM_0834	CUT_GIM_0834	CUT_GIM_0834	chrXII	543417	543708	-	CUT_GIM_RNA	CUT
CUT_GIM_0933	CUT_GIM_0933	CUT_GIM_0933	chrXIII	349621	349851	-	CUT_GIM_RNA	CUT
CUT_GIM_0061	CUT_GIM_0061	CUT_GIM_0061	chrV	415833	416551	-	CUT_GIM_RNA	CUT
CUT_GIM_0175	CUT_GIM_0175	CUT_GIM_0175	chrVI	74405	74665	-	CUT_GIM_RNA	CUT
CUT_GIM_0628	CUT_GIM_0628	CUT_GIM_0628	chrXV	217133	217272	+	CUT_GIM_RNA	CUT
CUT_GIM_0067	CUT_GIM_0067	CUT_GIM_0067	chrV	319214	319756	-	CUT_GIM_RNA	CUT
CUT_GIM_0856	CUT_GIM_0856	CUT_GIM_0856	chrXII	320365	320439	-	CUT_GIM_RNA	CUT
CUT_GIM_0445	CUT_GIM_0445	CUT_GIM_0445	chrVII	23784	24103	+	CUT_GIM_RNA	CUT
CUT_GIM_1211	CUT_GIM_1211	CUT_GIM_1211	chrIV	636263	636707	-	CUT_GIM_RNA	CUT
CUT_GIM_0258	CUT_GIM_0258	CUT_GIM_0258	chrXIV	108016	108188	-	CUT_GIM_RNA	CUT
CUT_GIM_0709	CUT_GIM_0709	CUT_GIM_0709	chrIX	342954	343830	+	CUT_GIM_RNA	CUT
CUT_GIM_0320	CUT_GIM_0320	CUT_GIM_0320	chrXVI	61589	62173	-	CUT_GIM_RNA	CUT
CUT_GIM_1209	CUT_GIM_1209	CUT_GIM_1209	chrIV	556380	556554	-	CUT_GIM_RNA	CUT
CUT_GIM_0978	CUT_GIM_0978	CUT_GIM_0978	chrIII	123269	123357	+	CUT_GIM_RNA	CUT
CUT_GIM_0696	CUT_GIM_0696	CUT_GIM_0696	chrXV	79590	79832	-	CUT_GIM_RNA	CUT
CUT_GIM_1197	CUT_GIM_1197	CUT_GIM_1197	chrIV	443645	444190	-	CUT_GIM_RNA	CUT
CUT_GIM_0236	CUT_GIM_0236	CUT_GIM_0236	chrXIV	275259	275972	-	CUT_GIM_RNA	CUT
CUT_GIM_0109	CUT_GIM_0109	CUT_GIM_0109	chrII	326329	326635	+	CUT_GIM_RNA	CUT
CUT_GIM_0239	CUT_GIM_0239	CUT_GIM_0239	chrXIV	532297	532518	-	CUT_GIM_RNA	CUT
CUT_GIM_1057	CUT_GIM_1057	CUT_GIM_1057	chrX	717605	718076	-	CUT_GIM_RNA	CUT
CUT_GIM_1075	CUT_GIM_1075	CUT_GIM_1075	chrX	180686	180875	-	CUT_GIM_RNA	CUT
CUT_GIM_0831	CUT_GIM_0831	CUT_GIM_0831	chrXII	548654	548831	-	CUT_GIM_RNA	CUT
CUT_GIM_0595	CUT_GIM_0595	CUT_GIM_0595	chrXV	340217	340362	+	CUT_GIM_RNA	CUT
CUT_GIM_0020	CUT_GIM_0020	CUT_GIM_0020	chrV	51855	52053	+	CUT_GIM_RNA	CUT
CUT_GIM_0192	CUT_GIM_0192	CUT_GIM_0192	chrXIV	357128	357469	+	CUT_GIM_RNA	CUT
CUT_GIM_0143	CUT_GIM_0143	CUT_GIM_0143	chrII	283353	283492	-	CUT_GIM_RNA	CUT
CUT_GIM_0768	CUT_GIM_0768	CUT_GIM_0768	chrXII	231353	231585	+	CUT_GIM_RNA	CUT
CUT_GIM_0399	CUT_GIM_0399	CUT_GIM_0399	chrXI	143531	143826	+	CUT_GIM_RNA	CUT
CUT_GIM_1177	CUT_GIM_1177	CUT_GIM_1177	chrIV	443502	444190	-	CUT_GIM_RNA	CUT
CUT_GIM_0332	CUT_GIM_0332	CUT_GIM_0332	chrXVI	882887	883013	-	CUT_GIM_RNA	CUT
CUT_GIM_0016	CUT_GIM_0016	CUT_GIM_0016	chrV	510123	510275	+	CUT_GIM_RNA	CUT
CUT_GIM_1106	CUT_GIM_1106	CUT_GIM_1106	chrIV	1166907	1167137	+	CUT_GIM_RNA	CUT
CUT_GIM_0585	CUT_GIM_0585	CUT_GIM_0585	chrVII	14328	14514	-	CUT_GIM_RNA	CUT
CUT_GIM_0603	CUT_GIM_0603	CUT_GIM_0603	chrXV	825250	826244	+	CUT_GIM_RNA	CUT
CUT_GIM_1243	CUT_GIM_1243	CUT_GIM_1243	chrI	42920	43331	+	CUT_GIM_RNA	CUT
CUT_GIM_1130	CUT_GIM_1130	CUT_GIM_1130	chrIV	511987	512975	+	CUT_GIM_RNA	CUT
CUT_GIM_0073	CUT_GIM_0073	CUT_GIM_0073	chrV	186879	187463	-	CUT_GIM_RNA	CUT
CUT_GIM_1278	CUT_GIM_1278	CUT_GIM_1278	chrVIII	287023	287340	+	CUT_GIM_RNA	CUT
CUT_GIM_0874	CUT_GIM_0874	CUT_GIM_0874	chrXIII	14981	15248	+	CUT_GIM_RNA	CUT
CUT_GIM_0848	CUT_GIM_0848	CUT_GIM_0848	chrXII	363991	364301	-	CUT_GIM_RNA	CUT
CUT_GIM_0929	CUT_GIM_0929	CUT_GIM_0929	chrXIII	352526	353004	-	CUT_GIM_RNA	CUT
CUT_GIM_1254	CUT_GIM_1254	CUT_GIM_1254	chrI	30558	30814	-	CUT_GIM_RNA	CUT
CUT_GIM_0490	CUT_GIM_0490	CUT_GIM_0490	chrVII	115889	116035	+	CUT_GIM_RNA	CUT
CUT_GIM_0467	CUT_GIM_0467	CUT_GIM_0467	chrVII	875355	875712	+	CUT_GIM_RNA	CUT
CUT_GIM_0251	CUT_GIM_0251	CUT_GIM_0251	chrXIV	736223	736495	-	CUT_GIM_RNA	CUT
CUT_GIM_1111	CUT_GIM_1111	CUT_GIM_1111	chrIV	1367094	1367288	+	CUT_GIM_RNA	CUT
CUT_GIM_0966	CUT_GIM_0966	CUT_GIM_0966	chrIII	68946	69350	+	CUT_GIM_RNA	CUT
CUT_GIM_0134	CUT_GIM_0134	CUT_GIM_0134	chrII	534835	534978	-	CUT_GIM_RNA	CUT
CUT_GIM_0431	CUT_GIM_0431	CUT_GIM_0431	chrXI	326999	327720	-	CUT_GIM_RNA	CUT
CUT_GIM_1022	CUT_GIM_1022	CUT_GIM_1022	chrX	338030	338387	+	CUT_GIM_RNA	CUT
CUT_GIM_0653	CUT_GIM_0653	CUT_GIM_0653	chrXV	524804	524943	-	CUT_GIM_RNA	CUT
CUT_GIM_0003	CUT_GIM_0003	CUT_GIM_0003	chrV	83009	83480	+	CUT_GIM_RNA	CUT
CUT_GIM_0180	CUT_GIM_0180	CUT_GIM_0180	chrXIV	295949	296203	+	CUT_GIM_RNA	CUT
CUT_GIM_1108	CUT_GIM_1108	CUT_GIM_1108	chrIV	542596	543142	+	CUT_GIM_RNA	CUT
CUT_GIM_1001	CUT_GIM_1001	CUT_GIM_1001	chrX	620566	620841	+	CUT_GIM_RNA	CUT
CUT_GIM_1267	CUT_GIM_1267	CUT_GIM_1267	chrVIII	470856	470954	+	CUT_GIM_RNA	CUT
CUT_GIM_0106	CUT_GIM_0106	CUT_GIM_0106	chrII	391911	392037	+	CUT_GIM_RNA	CUT
CUT_GIM_0229	CUT_GIM_0229	CUT_GIM_0229	chrXIV	663336	663665	-	CUT_GIM_RNA	CUT
CUT_GIM_0690	CUT_GIM_0690	CUT_GIM_0690	chrXV	820304	820805	-	CUT_GIM_RNA	CUT
CUT_GIM_0623	CUT_GIM_0623	CUT_GIM_0623	chrXV	159108	159273	+	CUT_GIM_RNA	CUT
CUT_GIM_0339	CUT_GIM_0339	CUT_GIM_0339	chrXVI	180535	181107	-	CUT_GIM_RNA	CUT
CUT_GIM_0779	CUT_GIM_0779	CUT_GIM_0779	chrXII	1002287	1002557	+	CUT_GIM_RNA	CUT
CUT_GIM_1019	CUT_GIM_1019	CUT_GIM_1019	chrX	640637	640848	+	CUT_GIM_RNA	CUT
CUT_GIM_0824	CUT_GIM_0824	CUT_GIM_0824	chrXII	417703	418088	-	CUT_GIM_RNA	CUT
CUT_GIM_0702	CUT_GIM_0702	CUT_GIM_0702	chrXV	264692	265180	-	CUT_GIM_RNA	CUT
CUT_GIM_0524	CUT_GIM_0524	CUT_GIM_0524	chrVII	73998	74260	-	CUT_GIM_RNA	CUT
CUT_GIM_0203	CUT_GIM_0203	CUT_GIM_0203	chrXIV	254479	254809	+	CUT_GIM_RNA	CUT
CUT_GIM_0387	CUT_GIM_0387	CUT_GIM_0387	chrXI	430827	430888	+	CUT_GIM_RNA	CUT
CUT_GIM_0182	CUT_GIM_0182	CUT_GIM_0182	chrXIV	417804	418065	+	CUT_GIM_RNA	CUT
CUT_GIM_0367	CUT_GIM_0367	CUT_GIM_0367	chrXVI	175854	176012	-	CUT_GIM_RNA	CUT
CUT_GIM_1180	CUT_GIM_1180	CUT_GIM_1180	chrIV	1251456	1251912	-	CUT_GIM_RNA	CUT
CUT_GIM_0601	CUT_GIM_0601	CUT_GIM_0601	chrXV	515085	515267	+	CUT_GIM_RNA	CUT
CUT_GIM_0604	CUT_GIM_0604	CUT_GIM_0604	chrXV	930607	930854	+	CUT_GIM_RNA	CUT
CUT_GIM_0268	CUT_GIM_0268	CUT_GIM_0268	chrXVI	645888	646415	+	CUT_GIM_RNA	CUT
CUT_GIM_0153	CUT_GIM_0153	CUT_GIM_0153	chrII	547066	547082	-	CUT_GIM_RNA	CUT
CUT_GIM_0360	CUT_GIM_0360	CUT_GIM_0360	chrXVI	685156	685661	-	CUT_GIM_RNA	CUT
CUT_GIM_1231	CUT_GIM_1231	CUT_GIM_1231	chrIV	370637	370965	-	CUT_GIM_RNA	CUT
CUT_GIM_1217	CUT_GIM_1217	CUT_GIM_1217	chrIV	729992	730324	-	CUT_GIM_RNA	CUT
CUT_GIM_1165	CUT_GIM_1165	CUT_GIM_1165	chrIV	357903	358115	-	CUT_GIM_RNA	CUT
CUT_GIM_0833	CUT_GIM_0833	CUT_GIM_0833	chrXII	424504	424752	-	CUT_GIM_RNA	CUT
CUT_GIM_0782	CUT_GIM_0782	CUT_GIM_0782	chrXII	1056996	1057219	+	CUT_GIM_RNA	CUT
CUT_GIM_0375	CUT_GIM_0375	CUT_GIM_0375	chrXI	316354	317312	+	CUT_GIM_RNA	CUT
CUT_GIM_1097	CUT_GIM_1097	CUT_GIM_1097	chrIV	720637	720782	+	CUT_GIM_RNA	CUT
CUT_GIM_0485	CUT_GIM_0485	CUT_GIM_0485	chrVII	320006	320298	+	CUT_GIM_RNA	CUT
CUT_GIM_0679	CUT_GIM_0679	CUT_GIM_0679	chrXV	342588	343432	-	CUT_GIM_RNA	CUT
CUT_GIM_0905	CUT_GIM_0905	CUT_GIM_0905	chrXIII	773632	773871	-	CUT_GIM_RNA	CUT
CUT_GIM_0272	CUT_GIM_0272	CUT_GIM_0272	chrXVI	700600	700697	+	CUT_GIM_RNA	CUT
CUT_GIM_0821	CUT_GIM_0821	CUT_GIM_0821	chrXII	766106	766340	-	CUT_GIM_RNA	CUT
CUT_GIM_1151	CUT_GIM_1151	CUT_GIM_1151	chrIV	413910	413949	+	CUT_GIM_RNA	CUT
CUT_GIM_0923	CUT_GIM_0923	CUT_GIM_0923	chrXIII	208806	209076	-	CUT_GIM_RNA	CUT
CUT_GIM_0546	CUT_GIM_0546	CUT_GIM_0546	chrVII	739373	739607	-	CUT_GIM_RNA	CUT
CUT_GIM_0459	CUT_GIM_0459	CUT_GIM_0459	chrVII	521942	522395	+	CUT_GIM_RNA	CUT
CUT_GIM_1143	CUT_GIM_1143	CUT_GIM_1143	chrIV	423813	424036	+	CUT_GIM_RNA	CUT
CUT_GIM_1282	CUT_GIM_1282	CUT_GIM_1282	chrVIII	10777	11517	+	CUT_GIM_RNA	CUT
CUT_GIM_0164	CUT_GIM_0164	CUT_GIM_0164	chrVI	221462	222364	+	CUT_GIM_RNA	CUT
CUT_GIM_0499	CUT_GIM_0499	CUT_GIM_0499	chrVII	1059088	1059211	+	CUT_GIM_RNA	CUT
CUT_GIM_0918	CUT_GIM_0918	CUT_GIM_0918	chrXIII	486148	486214	-	CUT_GIM_RNA	CUT
CUT_GIM_0013	CUT_GIM_0013	CUT_GIM_0013	chrV	192407	192694	+	CUT_GIM_RNA	CUT
CUT_GIM_0283	CUT_GIM_0283	CUT_GIM_0283	chrXVI	679614	679630	+	CUT_GIM_RNA	CUT
CUT_GIM_1079	CUT_GIM_1079	CUT_GIM_1079	chrX	704991	705193	-	CUT_GIM_RNA	CUT
CUT_GIM_0796	CUT_GIM_0796	CUT_GIM_0796	chrXII	849257	849423	+	CUT_GIM_RNA	CUT
CUT_GIM_0300	CUT_GIM_0300	CUT_GIM_0300	chrXVI	464358	464408	+	CUT_GIM_RNA	CUT
CUT_GIM_0260	CUT_GIM_0260	CUT_GIM_0260	chrXIV	715642	715884	-	CUT_GIM_RNA	CUT
CUT_GIM_0749	CUT_GIM_0749	CUT_GIM_0749	chrIX	47487	47934	-	CUT_GIM_RNA	CUT
CUT_GIM_0357	CUT_GIM_0357	CUT_GIM_0357	chrXVI	638962	639331	-	CUT_GIM_RNA	CUT
CUT_GIM_0319	CUT_GIM_0319	CUT_GIM_0319	chrXVI	466067	466949	-	CUT_GIM_RNA	CUT
CUT_GIM_1139	CUT_GIM_1139	CUT_GIM_1139	chrIV	1410978	1411805	+	CUT_GIM_RNA	CUT
CUT_GIM_0473	CUT_GIM_0473	CUT_GIM_0473	chrVII	823925	824038	+	CUT_GIM_RNA	CUT
CUT_GIM_0589	CUT_GIM_0589	CUT_GIM_0589	chrXV	61348	61952	+	CUT_GIM_RNA	CUT
CUT_GIM_0788	CUT_GIM_0788	CUT_GIM_0788	chrXII	198388	198604	+	CUT_GIM_RNA	CUT
CUT_GIM_1061	CUT_GIM_1061	CUT_GIM_1061	chrX	640157	640573	-	CUT_GIM_RNA	CUT
CUT_GIM_0539	CUT_GIM_0539	CUT_GIM_0539	chrVII	973987	974099	-	CUT_GIM_RNA	CUT
CUT_GIM_1043	CUT_GIM_1043	CUT_GIM_1043	chrX	157696	157927	-	CUT_GIM_RNA	CUT
CUT_GIM_1256	CUT_GIM_1256	CUT_GIM_1256	chrVIII	293875	294272	+	CUT_GIM_RNA	CUT
CUT_GIM_0421	CUT_GIM_0421	CUT_GIM_0421	chrXI	180264	180350	-	CUT_GIM_RNA	CUT
CUT_GIM_1215	CUT_GIM_1215	CUT_GIM_1215	chrIV	1166210	1166396	-	CUT_GIM_RNA	CUT
CUT_GIM_1280	CUT_GIM_1280	CUT_GIM_1280	chrVIII	74778	75128	+	CUT_GIM_RNA	CUT
CUT_GIM_1020	CUT_GIM_1020	CUT_GIM_1020	chrX	466472	466872	+	CUT_GIM_RNA	CUT
CUT_GIM_0165	CUT_GIM_0165	CUT_GIM_0165	chrVI	78096	78186	+	CUT_GIM_RNA	CUT
CUT_GIM_0484	CUT_GIM_0484	CUT_GIM_0484	chrVII	190361	190754	+	CUT_GIM_RNA	CUT
CUT_GIM_0843	CUT_GIM_0843	CUT_GIM_0843	chrXII	19915	20909	-	CUT_GIM_RNA	CUT
CUT_GIM_0019	CUT_GIM_0019	CUT_GIM_0019	chrV	57914	58450	+	CUT_GIM_RNA	CUT
CUT_GIM_1199	CUT_GIM_1199	CUT_GIM_1199	chrIV	575749	575832	-	CUT_GIM_RNA	CUT
CUT_GIM_0743	CUT_GIM_0743	CUT_GIM_0743	chrIX	349838	350106	-	CUT_GIM_RNA	CUT
CUT_GIM_0914	CUT_GIM_0914	CUT_GIM_0914	chrXIII	161168	161670	-	CUT_GIM_RNA	CUT
CUT_GIM_0177	CUT_GIM_0177	CUT_GIM_0177	chrXIV	271933	272132	+	CUT_GIM_RNA	CUT
CUT_GIM_0041	CUT_GIM_0041	CUT_GIM_0041	chrV	222744	223110	-	CUT_GIM_RNA	CUT
CUT_GIM_0414	CUT_GIM_0414	CUT_GIM_0414	chrXI	115082	115316	-	CUT_GIM_RNA	CUT
CUT_GIM_1219	CUT_GIM_1219	CUT_GIM_1219	chrIV	292245	292766	-	CUT_GIM_RNA	CUT
CUT_GIM_1305	CUT_GIM_1305	CUT_GIM_1305	chrVIII	465879	466332	-	CUT_GIM_RNA	CUT
CUT_GIM_1013	CUT_GIM_1013	CUT_GIM_1013	chrX	585091	585918	+	CUT_GIM_RNA	CUT
CUT_GIM_1222	CUT_GIM_1222	CUT_GIM_1222	chrIV	703903	704163	-	CUT_GIM_RNA	CUT
CUT_GIM_0759	CUT_GIM_0759	CUT_GIM_0759	chrXII	906692	906951	+	CUT_GIM_RNA	CUT
CUT_GIM_0393	CUT_GIM_0393	CUT_GIM_0393	chrXI	230355	230465	+	CUT_GIM_RNA	CUT
CUT_GIM_0502	CUT_GIM_0502	CUT_GIM_0502	chrVII	574563	574877	+	CUT_GIM_RNA	CUT
CUT_GIM_0377	CUT_GIM_0377	CUT_GIM_0377	chrXI	220296	220339	+	CUT_GIM_RNA	CUT
CUT_GIM_0213	CUT_GIM_0213	CUT_GIM_0213	chrXIV	416647	416790	+	CUT_GIM_RNA	CUT
CUT_GIM_1184	CUT_GIM_1184	CUT_GIM_1184	chrIV	593094	593414	-	CUT_GIM_RNA	CUT
CUT_GIM_1175	CUT_GIM_1175	CUT_GIM_1175	chrIV	345166	345448	-	CUT_GIM_RNA	CUT
CUT_GIM_1182	CUT_GIM_1182	CUT_GIM_1182	chrIV	1182355	1182912	-	CUT_GIM_RNA	CUT
CUT_GIM_0018	CUT_GIM_0018	CUT_GIM_0018	chrV	500245	500433	+	CUT_GIM_RNA	CUT
CUT_GIM_0550	CUT_GIM_0550	CUT_GIM_0550	chrVII	535604	535851	-	CUT_GIM_RNA	CUT
CUT_GIM_0800	CUT_GIM_0800	CUT_GIM_0800	chrXII	781771	782178	+	CUT_GIM_RNA	CUT
CUT_GIM_0199	CUT_GIM_0199	CUT_GIM_0199	chrXIV	348772	349122	+	CUT_GIM_RNA	CUT
CUT_GIM_0437	CUT_GIM_0437	CUT_GIM_0437	chrXI	588906	589892	-	CUT_GIM_RNA	CUT
CUT_GIM_1296	CUT_GIM_1296	CUT_GIM_1296	chrVIII	231351	231851	-	CUT_GIM_RNA	CUT
CUT_GIM_1065	CUT_GIM_1065	CUT_GIM_1065	chrX	53683	54141	-	CUT_GIM_RNA	CUT
CUT_GIM_0328	CUT_GIM_0328	CUT_GIM_0328	chrXVI	527521	527713	-	CUT_GIM_RNA	CUT
CUT_GIM_0959	CUT_GIM_0959	CUT_GIM_0959	chrXIII	789499	789909	-	CUT_GIM_RNA	CUT
CUT_GIM_1174	CUT_GIM_1174	CUT_GIM_1174	chrIV	709189	709294	-	CUT_GIM_RNA	CUT
CUT_GIM_0390	CUT_GIM_0390	CUT_GIM_0390	chrXI	231308	231581	+	CUT_GIM_RNA	CUT
CUT_GIM_0764	CUT_GIM_0764	CUT_GIM_0764	chrXII	493472	493639	+	CUT_GIM_RNA	CUT
CUT_GIM_0740	CUT_GIM_0740	CUT_GIM_0740	chrIX	260675	260932	-	CUT_GIM_RNA	CUT
CUT_GIM_0807	CUT_GIM_0807	CUT_GIM_0807	chrXII	604210	604398	+	CUT_GIM_RNA	CUT
CUT_GIM_0156	CUT_GIM_0156	CUT_GIM_0156	chrVI	27668	28456	+	CUT_GIM_RNA	CUT
CUT_GIM_0686	CUT_GIM_0686	CUT_GIM_0686	chrXV	79433	79832	-	CUT_GIM_RNA	CUT
CUT_GIM_0086	CUT_GIM_0086	CUT_GIM_0086	chrII	474388	474661	+	CUT_GIM_RNA	CUT
CUT_GIM_0343	CUT_GIM_0343	CUT_GIM_0343	chrXVI	699331	700023	-	CUT_GIM_RNA	CUT
CUT_GIM_0508	CUT_GIM_0508	CUT_GIM_0508	chrVII	795874	796080	+	CUT_GIM_RNA	CUT
CUT_GIM_1037	CUT_GIM_1037	CUT_GIM_1037	chrX	111555	111731	+	CUT_GIM_RNA	CUT
CUT_GIM_0035	CUT_GIM_0035	CUT_GIM_0035	chrV	84746	84824	-	CUT_GIM_RNA	CUT
CUT_GIM_1004	CUT_GIM_1004	CUT_GIM_1004	chrX	315035	315182	+	CUT_GIM_RNA	CUT
CUT_GIM_0787	CUT_GIM_0787	CUT_GIM_0787	chrXII	498207	498507	+	CUT_GIM_RNA	CUT
CUT_GIM_1077	CUT_GIM_1077	CUT_GIM_1077	chrX	63447	63599	-	CUT_GIM_RNA	CUT
CUT_GIM_0591	CUT_GIM_0591	CUT_GIM_0591	chrXV	267854	268290	+	CUT_GIM_RNA	CUT
CUT_GIM_1055	CUT_GIM_1055	CUT_GIM_1055	chrX	268016	268405	-	CUT_GIM_RNA	CUT
CUT_GIM_1112	CUT_GIM_1112	CUT_GIM_1112	chrIV	506326	506666	+	CUT_GIM_RNA	CUT
CUT_GIM_0626	CUT_GIM_0626	CUT_GIM_0626	chrXV	649312	649484	+	CUT_GIM_RNA	CUT
CUT_GIM_0846	CUT_GIM_0846	CUT_GIM_0846	chrXII	789460	789713	-	CUT_GIM_RNA	CUT
CUT_GIM_1242	CUT_GIM_1242	CUT_GIM_1242	chrI	113616	114081	+	CUT_GIM_RNA	CUT
CUT_GIM_0727	CUT_GIM_0727	CUT_GIM_0727	chrIX	96834	96959	+	CUT_GIM_RNA	CUT
CUT_GIM_0052	CUT_GIM_0052	CUT_GIM_0052	chrV	15626	15988	-	CUT_GIM_RNA	CUT
CUT_GIM_0025	CUT_GIM_0025	CUT_GIM_0025	chrV	460538	460777	+	CUT_GIM_RNA	CUT
CUT_GIM_0150	CUT_GIM_0150	CUT_GIM_0150	chrII	490353	490918	-	CUT_GIM_RNA	CUT
CUT_GIM_0274	CUT_GIM_0274	CUT_GIM_0274	chrXVI	928504	928799	+	CUT_GIM_RNA	CUT
CUT_GIM_1195	CUT_GIM_1195	CUT_GIM_1195	chrIV	174297	174541	-	CUT_GIM_RNA	CUT
CUT_GIM_0745	CUT_GIM_0745	CUT_GIM_0745	chrIX	101993	102682	-	CUT_GIM_RNA	CUT
CUT_GIM_0022	CUT_GIM_0022	CUT_GIM_0022	chrV	332218	332504	+	CUT_GIM_RNA	CUT
CUT_GIM_0498	CUT_GIM_0498	CUT_GIM_0498	chrVII	1078605	1078663	+	CUT_GIM_RNA	CUT
CUT_GIM_0633	CUT_GIM_0633	CUT_GIM_0633	chrXV	426449	426715	+	CUT_GIM_RNA	CUT
CUT_GIM_0046	CUT_GIM_0046	CUT_GIM_0046	chrV	68654	68944	-	CUT_GIM_RNA	CUT
CUT_GIM_0036	CUT_GIM_0036	CUT_GIM_0036	chrV	69261	70229	-	CUT_GIM_RNA	CUT
CUT_GIM_0540	CUT_GIM_0540	CUT_GIM_0540	chrVII	894148	894327	-	CUT_GIM_RNA	CUT
CUT_GIM_1271	CUT_GIM_1271	CUT_GIM_1271	chrVIII	364408	365002	+	CUT_GIM_RNA	CUT
CUT_GIM_0216	CUT_GIM_0216	CUT_GIM_0216	chrXIV	426880	427225	-	CUT_GIM_RNA	CUT
CUT_GIM_0507	CUT_GIM_0507	CUT_GIM_0507	chrVII	472753	472989	+	CUT_GIM_RNA	CUT
CUT_GIM_1015	CUT_GIM_1015	CUT_GIM_1015	chrX	262820	262977	+	CUT_GIM_RNA	CUT
CUT_GIM_1045	CUT_GIM_1045	CUT_GIM_1045	chrX	144491	144859	-	CUT_GIM_RNA	CUT
CUT_GIM_0961	CUT_GIM_0961	CUT_GIM_0961	chrXIII	259178	260090	-	CUT_GIM_RNA	CUT
CUT_GIM_0951	CUT_GIM_0951	CUT_GIM_0951	chrXIII	914538	915075	-	CUT_GIM_RNA	CUT
CUT_GIM_0395	CUT_GIM_0395	CUT_GIM_0395	chrXI	389602	389702	+	CUT_GIM_RNA	CUT
CUT_GIM_0314	CUT_GIM_0314	CUT_GIM_0314	chrXVI	928517	928840	-	CUT_GIM_RNA	CUT
CUT_GIM_1149	CUT_GIM_1149	CUT_GIM_1149	chrIV	666986	667472	+	CUT_GIM_RNA	CUT
CUT_GIM_1210	CUT_GIM_1210	CUT_GIM_1210	chrIV	689509	690488	-	CUT_GIM_RNA	CUT
CUT_GIM_0033	CUT_GIM_0033	CUT_GIM_0033	chrV	390352	390526	+	CUT_GIM_RNA	CUT
CUT_GIM_0896	CUT_GIM_0896	CUT_GIM_0896	chrXIII	798369	798688	+	CUT_GIM_RNA	CUT
CUT_GIM_0146	CUT_GIM_0146	CUT_GIM_0146	chrII	634211	634813	-	CUT_GIM_RNA	CUT
CUT_GIM_0614	CUT_GIM_0614	CUT_GIM_0614	chrXV	825250	825399	+	CUT_GIM_RNA	CUT
CUT_GIM_0852	CUT_GIM_0852	CUT_GIM_0852	chrXII	727909	728292	-	CUT_GIM_RNA	CUT
CUT_GIM_0850	CUT_GIM_0850	CUT_GIM_0850	chrXII	1042780	1043061	-	CUT_GIM_RNA	CUT
CUT_GIM_0649	CUT_GIM_0649	CUT_GIM_0649	chrXV	494777	494974	+	CUT_GIM_RNA	CUT
CUT_GIM_0990	CUT_GIM_0990	CUT_GIM_0990	chrIII	163231	163380	-	CUT_GIM_RNA	CUT
CUT_GIM_0430	CUT_GIM_0430	CUT_GIM_0430	chrXI	513750	514252	-	CUT_GIM_RNA	CUT
CUT_GIM_0327	CUT_GIM_0327	CUT_GIM_0327	chrXVI	497568	497713	-	CUT_GIM_RNA	CUT
CUT_GIM_0677	CUT_GIM_0677	CUT_GIM_0677	chrXV	234356	234500	-	CUT_GIM_RNA	CUT
CUT_GIM_0282	CUT_GIM_0282	CUT_GIM_0282	chrXVI	453397	454074	+	CUT_GIM_RNA	CUT
CUT_GIM_0572	CUT_GIM_0572	CUT_GIM_0572	chrVII	286885	287131	-	CUT_GIM_RNA	CUT
CUT_GIM_1176	CUT_GIM_1176	CUT_GIM_1176	chrIV	524906	525038	-	CUT_GIM_RNA	CUT
CUT_GIM_0950	CUT_GIM_0950	CUT_GIM_0950	chrXIII	509287	509499	-	CUT_GIM_RNA	CUT
CUT_GIM_1142	CUT_GIM_1142	CUT_GIM_1142	chrIV	1269991	1270113	+	CUT_GIM_RNA	CUT
CUT_GIM_0346	CUT_GIM_0346	CUT_GIM_0346	chrXVI	719243	719287	-	CUT_GIM_RNA	CUT
CUT_GIM_0724	CUT_GIM_0724	CUT_GIM_0724	chrIX	275091	275435	+	CUT_GIM_RNA	CUT
CUT_GIM_0857	CUT_GIM_0857	CUT_GIM_0857	chrXII	989810	990526	-	CUT_GIM_RNA	CUT
CUT_GIM_0909	CUT_GIM_0909	CUT_GIM_0909	chrXIII	902294	902347	-	CUT_GIM_RNA	CUT
CUT_GIM_0769	CUT_GIM_0769	CUT_GIM_0769	chrXII	245631	245794	+	CUT_GIM_RNA	CUT
CUT_GIM_0586	CUT_GIM_0586	CUT_GIM_0586	chrVII	55930	56181	-	CUT_GIM_RNA	CUT
CUT_GIM_0410	CUT_GIM_0410	CUT_GIM_0410	chrXI	454496	454780	+	CUT_GIM_RNA	CUT
CUT_GIM_0024	CUT_GIM_0024	CUT_GIM_0024	chrV	238643	239068	+	CUT_GIM_RNA	CUT
CUT_GIM_0420	CUT_GIM_0420	CUT_GIM_0420	chrXI	245798	245967	-	CUT_GIM_RNA	CUT
CUT_GIM_0869	CUT_GIM_0869	CUT_GIM_0869	chrXIII	867598	867719	+	CUT_GIM_RNA	CUT
CUT_GIM_0717	CUT_GIM_0717	CUT_GIM_0717	chrIX	199545	200509	+	CUT_GIM_RNA	CUT
CUT_GIM_1297	CUT_GIM_1297	CUT_GIM_1297	chrVIII	540603	540742	-	CUT_GIM_RNA	CUT
CUT_GIM_0654	CUT_GIM_0654	CUT_GIM_0654	chrXV	774907	775466	-	CUT_GIM_RNA	CUT
CUT_GIM_0504	CUT_GIM_0504	CUT_GIM_0504	chrVII	592253	592295	+	CUT_GIM_RNA	CUT
CUT_GIM_0891	CUT_GIM_0891	CUT_GIM_0891	chrXIII	784517	784996	+	CUT_GIM_RNA	CUT
CUT_GIM_0132	CUT_GIM_0132	CUT_GIM_0132	chrII	706951	707164	-	CUT_GIM_RNA	CUT
CUT_GIM_0665	CUT_GIM_0665	CUT_GIM_0665	chrXV	1076122	1076519	-	CUT_GIM_RNA	CUT
CUT_GIM_0659	CUT_GIM_0659	CUT_GIM_0659	chrXV	218510	218686	-	CUT_GIM_RNA	CUT
CUT_GIM_1237	CUT_GIM_1237	CUT_GIM_1237	chrIV	488937	489210	-	CUT_GIM_RNA	CUT
CUT_GIM_0530	CUT_GIM_0530	CUT_GIM_0530	chrVII	996504	996599	-	CUT_GIM_RNA	CUT
CUT_GIM_0209	CUT_GIM_0209	CUT_GIM_0209	chrXIV	661499	662384	+	CUT_GIM_RNA	CUT
CUT_GIM_0058	CUT_GIM_0058	CUT_GIM_0058	chrV	319564	319756	-	CUT_GIM_RNA	CUT
CUT_GIM_0956	CUT_GIM_0956	CUT_GIM_0956	chrXIII	111473	111691	-	CUT_GIM_RNA	CUT
CUT_GIM_0664	CUT_GIM_0664	CUT_GIM_0664	chrXV	638617	638769	-	CUT_GIM_RNA	CUT
CUT_GIM_1080	CUT_GIM_1080	CUT_GIM_1080	chrX	268256	268405	-	CUT_GIM_RNA	CUT
CUT_GIM_0220	CUT_GIM_0220	CUT_GIM_0220	chrXIV	275727	275972	-	CUT_GIM_RNA	CUT
CUT_GIM_0992	CUT_GIM_0992	CUT_GIM_0992	chrX	227345	228302	+	CUT_GIM_RNA	CUT
CUT_GIM_1240	CUT_GIM_1240	CUT_GIM_1240	chrIV	1435637	1435982	-	CUT_GIM_RNA	CUT
CUT_GIM_0433	CUT_GIM_0433	CUT_GIM_0433	chrXI	320220	320777	-	CUT_GIM_RNA	CUT
CUT_GIM_0062	CUT_GIM_0062	CUT_GIM_0062	chrV	140250	140391	-	CUT_GIM_RNA	CUT
CUT_GIM_0636	CUT_GIM_0636	CUT_GIM_0636	chrXV	553166	553830	+	CUT_GIM_RNA	CUT
CUT_GIM_0286	CUT_GIM_0286	CUT_GIM_0286	chrXVI	75634	76103	+	CUT_GIM_RNA	CUT
CUT_GIM_0583	CUT_GIM_0583	CUT_GIM_0583	chrVII	164917	165116	-	CUT_GIM_RNA	CUT
CUT_GIM_0919	CUT_GIM_0919	CUT_GIM_0919	chrXIII	510488	510638	-	CUT_GIM_RNA	CUT
CUT_GIM_1046	CUT_GIM_1046	CUT_GIM_1046	chrX	337157	337540	-	CUT_GIM_RNA	CUT
CUT_GIM_0903	CUT_GIM_0903	CUT_GIM_0903	chrXIII	675024	675320	+	CUT_GIM_RNA	CUT
CUT_GIM_0113	CUT_GIM_0113	CUT_GIM_0113	chrII	381342	381561	+	CUT_GIM_RNA	CUT
CUT_GIM_0774	CUT_GIM_0774	CUT_GIM_0774	chrXII	388572	388909	+	CUT_GIM_RNA	CUT
CUT_GIM_0927	CUT_GIM_0927	CUT_GIM_0927	chrXIII	832306	832955	-	CUT_GIM_RNA	CUT
CUT_GIM_0713	CUT_GIM_0713	CUT_GIM_0713	chrIX	187983	188198	+	CUT_GIM_RNA	CUT
CUT_GIM_1122	CUT_GIM_1122	CUT_GIM_1122	chrIV	1493414	1493691	+	CUT_GIM_RNA	CUT
CUT_GIM_0042	CUT_GIM_0042	CUT_GIM_0042	chrV	416290	416551	-	CUT_GIM_RNA	CUT
CUT_GIM_0349	CUT_GIM_0349	CUT_GIM_0349	chrXVI	874704	874891	-	CUT_GIM_RNA	CUT
CUT_GIM_1168	CUT_GIM_1168	CUT_GIM_1168	chrIV	929815	930472	-	CUT_GIM_RNA	CUT
CUT_GIM_0397	CUT_GIM_0397	CUT_GIM_0397	chrXI	328110	328780	+	CUT_GIM_RNA	CUT
CUT_GIM_0030	CUT_GIM_0030	CUT_GIM_0030	chrV	467732	468471	+	CUT_GIM_RNA	CUT
CUT_GIM_1003	CUT_GIM_1003	CUT_GIM_1003	chrX	180566	181164	+	CUT_GIM_RNA	CUT
CUT_GIM_0515	CUT_GIM_0515	CUT_GIM_0515	chrVII	958693	958955	+	CUT_GIM_RNA	CUT
CUT_GIM_0394	CUT_GIM_0394	CUT_GIM_0394	chrXI	315601	316228	+	CUT_GIM_RNA	CUT
CUT_GIM_0419	CUT_GIM_0419	CUT_GIM_0419	chrXI	259613	260314	-	CUT_GIM_RNA	CUT
CUT_GIM_1314	CUT_GIM_1314	CUT_GIM_1314	chrVIII	406652	406829	-	CUT_GIM_RNA	CUT
CUT_GIM_0598	CUT_GIM_0598	CUT_GIM_0598	chrXV	315658	316302	+	CUT_GIM_RNA	CUT
CUT_GIM_0402	CUT_GIM_0402	CUT_GIM_0402	chrXI	222835	223069	+	CUT_GIM_RNA	CUT
CUT_GIM_1116	CUT_GIM_1116	CUT_GIM_1116	chrIV	1420492	1420720	+	CUT_GIM_RNA	CUT
CUT_GIM_1315	CUT_GIM_1315	CUT_GIM_1315	chrVIII	69757	70063	-	CUT_GIM_RNA	CUT
CUT_GIM_0878	CUT_GIM_0878	CUT_GIM_0878	chrXIII	789082	789400	+	CUT_GIM_RNA	CUT
CUT_GIM_0221	CUT_GIM_0221	CUT_GIM_0221	chrXIV	184977	185234	-	CUT_GIM_RNA	CUT
CUT_GIM_0864	CUT_GIM_0864	CUT_GIM_0864	chrXII	436731	437061	-	CUT_GIM_RNA	CUT
CUT_GIM_1190	CUT_GIM_1190	CUT_GIM_1190	chrIV	1020098	1020399	-	CUT_GIM_RNA	CUT
CUT_GIM_1265	CUT_GIM_1265	CUT_GIM_1265	chrVIII	206365	206501	+	CUT_GIM_RNA	CUT
CUT_GIM_0456	CUT_GIM_0456	CUT_GIM_0456	chrVII	521201	521868	+	CUT_GIM_RNA	CUT
CUT_GIM_0407	CUT_GIM_0407	CUT_GIM_0407	chrXI	164935	165365	+	CUT_GIM_RNA	CUT
CUT_GIM_0889	CUT_GIM_0889	CUT_GIM_0889	chrXIII	97703	97871	+	CUT_GIM_RNA	CUT
CUT_GIM_0630	CUT_GIM_0630	CUT_GIM_0630	chrXV	87473	87634	+	CUT_GIM_RNA	CUT
CUT_GIM_0647	CUT_GIM_0647	CUT_GIM_0647	chrXV	580036	580201	+	CUT_GIM_RNA	CUT
CUT_GIM_0809	CUT_GIM_0809	CUT_GIM_0809	chrXII	719662	719861	+	CUT_GIM_RNA	CUT
CUT_GIM_0118	CUT_GIM_0118	CUT_GIM_0118	chrII	408064	408180	-	CUT_GIM_RNA	CUT
CUT_GIM_0166	CUT_GIM_0166	CUT_GIM_0166	chrVI	100450	100606	+	CUT_GIM_RNA	CUT
CUT_GIM_0795	CUT_GIM_0795	CUT_GIM_0795	chrXII	826871	827098	+	CUT_GIM_RNA	CUT
CUT_GIM_0596	CUT_GIM_0596	CUT_GIM_0596	chrXV	21913	22539	+	CUT_GIM_RNA	CUT
CUT_GIM_0798	CUT_GIM_0798	CUT_GIM_0798	chrXII	323361	323679	+	CUT_GIM_RNA	CUT
CUT_GIM_0819	CUT_GIM_0819	CUT_GIM_0819	chrXII	201616	201739	-	CUT_GIM_RNA	CUT
CUT_GIM_0916	CUT_GIM_0916	CUT_GIM_0916	chrXIII	914966	915075	-	CUT_GIM_RNA	CUT
CUT_GIM_0519	CUT_GIM_0519	CUT_GIM_0519	chrVII	167043	167380	-	CUT_GIM_RNA	CUT
CUT_GIM_1002	CUT_GIM_1002	CUT_GIM_1002	chrX	471117	471338	+	CUT_GIM_RNA	CUT
CUT_GIM_0957	CUT_GIM_0957	CUT_GIM_0957	chrXIII	758775	759699	-	CUT_GIM_RNA	CUT
CUT_GIM_0920	CUT_GIM_0920	CUT_GIM_0920	chrXIII	216859	217087	-	CUT_GIM_RNA	CUT
CUT_GIM_0275	CUT_GIM_0275	CUT_GIM_0275	chrXVI	527281	527579	+	CUT_GIM_RNA	CUT
CUT_GIM_0860	CUT_GIM_0860	CUT_GIM_0860	chrXII	248438	248599	-	CUT_GIM_RNA	CUT
CUT_GIM_0554	CUT_GIM_0554	CUT_GIM_0554	chrVII	23092	23103	-	CUT_GIM_RNA	CUT
CUT_GIM_1007	CUT_GIM_1007	CUT_GIM_1007	chrX	617508	617824	+	CUT_GIM_RNA	CUT
CUT_GIM_0186	CUT_GIM_0186	CUT_GIM_0186	chrXIV	779912	780291	+	CUT_GIM_RNA	CUT
CUT_GIM_1298	CUT_GIM_1298	CUT_GIM_1298	chrVIII	208957	209269	-	CUT_GIM_RNA	CUT
CUT_GIM_0592	CUT_GIM_0592	CUT_GIM_0592	chrXV	96770	97156	+	CUT_GIM_RNA	CUT
CUT_GIM_0814	CUT_GIM_0814	CUT_GIM_0814	chrXII	49281	49619	-	CUT_GIM_RNA	CUT
CUT_GIM_0651	CUT_GIM_0651	CUT_GIM_0651	chrXV	233600	234500	-	CUT_GIM_RNA	CUT
CUT_GIM_0426	CUT_GIM_0426	CUT_GIM_0426	chrXI	353101	353845	-	CUT_GIM_RNA	CUT
CUT_GIM_0365	CUT_GIM_0365	CUT_GIM_0365	chrXVI	876138	876180	-	CUT_GIM_RNA	CUT
CUT_GIM_0897	CUT_GIM_0897	CUT_GIM_0897	chrXIII	560881	560996	+	CUT_GIM_RNA	CUT
CUT_GIM_0291	CUT_GIM_0291	CUT_GIM_0291	chrXVI	267766	268117	+	CUT_GIM_RNA	CUT
CUT_GIM_0428	CUT_GIM_0428	CUT_GIM_0428	chrXI	407629	407968	-	CUT_GIM_RNA	CUT
CUT_GIM_0071	CUT_GIM_0071	CUT_GIM_0071	chrV	335098	335346	-	CUT_GIM_RNA	CUT
CUT_GIM_0083	CUT_GIM_0083	CUT_GIM_0083	chrII	365876	366370	+	CUT_GIM_RNA	CUT
CUT_GIM_1038	CUT_GIM_1038	CUT_GIM_1038	chrX	173567	173929	+	CUT_GIM_RNA	CUT
CUT_GIM_1272	CUT_GIM_1272	CUT_GIM_1272	chrVIII	362018	362175	+	CUT_GIM_RNA	CUT
CUT_GIM_0439	CUT_GIM_0439	CUT_GIM_0439	chrXI	570736	571203	-	CUT_GIM_RNA	CUT
CUT_GIM_1103	CUT_GIM_1103	CUT_GIM_1103	chrIV	1071440	1071898	+	CUT_GIM_RNA	CUT
CUT_GIM_0465	CUT_GIM_0465	CUT_GIM_0465	chrVII	879648	879801	+	CUT_GIM_RNA	CUT
CUT_GIM_0931	CUT_GIM_0931	CUT_GIM_0931	chrXIII	770356	770513	-	CUT_GIM_RNA	CUT
CUT_GIM_0255	CUT_GIM_0255	CUT_GIM_0255	chrXIV	174308	174311	-	CUT_GIM_RNA	CUT
CUT_GIM_1277	CUT_GIM_1277	CUT_GIM_1277	chrVIII	496951	497642	+	CUT_GIM_RNA	CUT
CUT_GIM_0762	CUT_GIM_0762	CUT_GIM_0762	chrXII	248786	249234	+	CUT_GIM_RNA	CUT
CUT_GIM_0266	CUT_GIM_0266	CUT_GIM_0266	chrXVI	183466	184456	+	CUT_GIM_RNA	CUT
CUT_GIM_0688	CUT_GIM_0688	CUT_GIM_0688	chrXV	586189	586381	-	CUT_GIM_RNA	CUT
CUT_GIM_0718	CUT_GIM_0718	CUT_GIM_0718	chrIX	160663	160959	+	CUT_GIM_RNA	CUT
CUT_GIM_1207	CUT_GIM_1207	CUT_GIM_1207	chrIV	1013588	1014556	-	CUT_GIM_RNA	CUT
CUT_GIM_1109	CUT_GIM_1109	CUT_GIM_1109	chrIV	1487578	1487783	+	CUT_GIM_RNA	CUT
CUT_GIM_0446	CUT_GIM_0446	CUT_GIM_0446	chrVII	228779	229416	+	CUT_GIM_RNA	CUT
CUT_GIM_0464	CUT_GIM_0464	CUT_GIM_0464	chrVII	535124	535219	+	CUT_GIM_RNA	CUT
CUT_GIM_0981	CUT_GIM_0981	CUT_GIM_0981	chrIII	291053	291164	-	CUT_GIM_RNA	CUT
CUT_GIM_0643	CUT_GIM_0643	CUT_GIM_0643	chrXV	605325	605552	+	CUT_GIM_RNA	CUT
CUT_GIM_0536	CUT_GIM_0536	CUT_GIM_0536	chrVII	533406	533679	-	CUT_GIM_RNA	CUT
CUT_GIM_1148	CUT_GIM_1148	CUT_GIM_1148	chrIV	976924	977872	+	CUT_GIM_RNA	CUT
CUT_GIM_0804	CUT_GIM_0804	CUT_GIM_0804	chrXII	738224	738535	+	CUT_GIM_RNA	CUT
CUT_GIM_1225	CUT_GIM_1225	CUT_GIM_1225	chrIV	130468	130482	-	CUT_GIM_RNA	CUT
CUT_GIM_0535	CUT_GIM_0535	CUT_GIM_0535	chrVII	515869	516274	-	CUT_GIM_RNA	CUT
CUT_GIM_0899	CUT_GIM_0899	CUT_GIM_0899	chrXIII	220097	220268	+	CUT_GIM_RNA	CUT
CUT_GIM_0750	CUT_GIM_0750	CUT_GIM_0750	chrXII	728786	728960	+	CUT_GIM_RNA	CUT
CUT_GIM_0322	CUT_GIM_0322	CUT_GIM_0322	chrXVI	39959	40240	-	CUT_GIM_RNA	CUT
CUT_GIM_1157	CUT_GIM_1157	CUT_GIM_1157	chrIV	551446	551529	+	CUT_GIM_RNA	CUT
CUT_GIM_1306	CUT_GIM_1306	CUT_GIM_1306	chrVIII	273248	273399	-	CUT_GIM_RNA	CUT
CUT_GIM_0012	CUT_GIM_0012	CUT_GIM_0012	chrV	268810	268978	+	CUT_GIM_RNA	CUT
CUT_GIM_0308	CUT_GIM_0308	CUT_GIM_0308	chrXVI	697095	697591	+	CUT_GIM_RNA	CUT
CUT_GIM_0152	CUT_GIM_0152	CUT_GIM_0152	chrII	169846	170411	-	CUT_GIM_RNA	CUT
CUT_GIM_0224	CUT_GIM_0224	CUT_GIM_0224	chrXIV	407835	408072	-	CUT_GIM_RNA	CUT
CUT_GIM_1133	CUT_GIM_1133	CUT_GIM_1133	chrIV	1427371	1427794	+	CUT_GIM_RNA	CUT
CUT_GIM_0735	CUT_GIM_0735	CUT_GIM_0735	chrIX	237741	237777	-	CUT_GIM_RNA	CUT
CUT_GIM_0737	CUT_GIM_0737	CUT_GIM_0737	chrIX	127294	127749	-	CUT_GIM_RNA	CUT
CUT_GIM_0476	CUT_GIM_0476	CUT_GIM_0476	chrVII	23784	24309	+	CUT_GIM_RNA	CUT
CUT_GIM_0425	CUT_GIM_0425	CUT_GIM_0425	chrXI	184505	185182	-	CUT_GIM_RNA	CUT
CUT_GIM_0135	CUT_GIM_0135	CUT_GIM_0135	chrII	774302	774510	-	CUT_GIM_RNA	CUT
CUT_GIM_0238	CUT_GIM_0238	CUT_GIM_0238	chrXIV	525383	525836	-	CUT_GIM_RNA	CUT
CUT_GIM_0877	CUT_GIM_0877	CUT_GIM_0877	chrXIII	330440	330774	+	CUT_GIM_RNA	CUT
CUT_GIM_0704	CUT_GIM_0704	CUT_GIM_0704	chrXV	517309	517373	-	CUT_GIM_RNA	CUT
CUT_GIM_0107	CUT_GIM_0107	CUT_GIM_0107	chrII	483793	483944	+	CUT_GIM_RNA	CUT
CUT_GIM_0943	CUT_GIM_0943	CUT_GIM_0943	chrXIII	654540	654554	-	CUT_GIM_RNA	CUT
CUT_GIM_1251	CUT_GIM_1251	CUT_GIM_1251	chrI	71612	71965	+	CUT_GIM_RNA	CUT
CUT_GIM_0489	CUT_GIM_0489	CUT_GIM_0489	chrVII	785291	786229	+	CUT_GIM_RNA	CUT
CUT_GIM_0014	CUT_GIM_0014	CUT_GIM_0014	chrV	131228	131513	+	CUT_GIM_RNA	CUT
CUT_GIM_0522	CUT_GIM_0522	CUT_GIM_0522	chrVII	544359	544929	-	CUT_GIM_RNA	CUT
CUT_GIM_0204	CUT_GIM_0204	CUT_GIM_0204	chrXIV	613407	613723	+	CUT_GIM_RNA	CUT
CUT_GIM_0666	CUT_GIM_0666	CUT_GIM_0666	chrXV	741790	742142	-	CUT_GIM_RNA	CUT
CUT_GIM_0110	CUT_GIM_0110	CUT_GIM_0110	chrII	707002	707309	+	CUT_GIM_RNA	CUT
CUT_GIM_0932	CUT_GIM_0932	CUT_GIM_0932	chrXIII	354747	355139	-	CUT_GIM_RNA	CUT
CUT_GIM_1048	CUT_GIM_1048	CUT_GIM_1048	chrX	472076	472601	-	CUT_GIM_RNA	CUT
CUT_GIM_0761	CUT_GIM_0761	CUT_GIM_0761	chrXII	373428	374288	+	CUT_GIM_RNA	CUT
CUT_GIM_1028	CUT_GIM_1028	CUT_GIM_1028	chrX	604487	604769	+	CUT_GIM_RNA	CUT
CUT_GIM_0662	CUT_GIM_0662	CUT_GIM_0662	chrXV	494275	494897	-	CUT_GIM_RNA	CUT
CUT_GIM_0678	CUT_GIM_0678	CUT_GIM_0678	chrXV	1043103	1043237	-	CUT_GIM_RNA	CUT
CUT_GIM_0853	CUT_GIM_0853	CUT_GIM_0853	chrXII	503657	504073	-	CUT_GIM_RNA	CUT
CUT_GIM_0297	CUT_GIM_0297	CUT_GIM_0297	chrXVI	517464	517669	+	CUT_GIM_RNA	CUT
CUT_GIM_0582	CUT_GIM_0582	CUT_GIM_0582	chrVII	417138	417217	-	CUT_GIM_RNA	CUT
CUT_GIM_0334	CUT_GIM_0334	CUT_GIM_0334	chrXVI	61741	62173	-	CUT_GIM_RNA	CUT
CUT_GIM_0197	CUT_GIM_0197	CUT_GIM_0197	chrXIV	145466	145852	+	CUT_GIM_RNA	CUT
CUT_GIM_0746	CUT_GIM_0746	CUT_GIM_0746	chrIX	341995	342664	-	CUT_GIM_RNA	CUT
CUT_GIM_0729	CUT_GIM_0729	CUT_GIM_0729	chrIX	216066	216470	-	CUT_GIM_RNA	CUT
CUT_GIM_0247	CUT_GIM_0247	CUT_GIM_0247	chrXIV	619599	619799	-	CUT_GIM_RNA	CUT
CUT_GIM_0362	CUT_GIM_0362	CUT_GIM_0362	chrXVI	239071	239078	-	CUT_GIM_RNA	CUT
CUT_GIM_0450	CUT_GIM_0450	CUT_GIM_0450	chrVII	427288	427607	+	CUT_GIM_RNA	CUT
CUT_GIM_0045	CUT_GIM_0045	CUT_GIM_0045	chrV	272042	272278	-	CUT_GIM_RNA	CUT
CUT_GIM_0189	CUT_GIM_0189	CUT_GIM_0189	chrXIV	507602	507790	+	CUT_GIM_RNA	CUT
CUT_GIM_0832	CUT_GIM_0832	CUT_GIM_0832	chrXII	125748	125838	-	CUT_GIM_RNA	CUT
CUT_GIM_0861	CUT_GIM_0861	CUT_GIM_0861	chrXII	826359	826982	-	CUT_GIM_RNA	CUT
CUT_GIM_1187	CUT_GIM_1187	CUT_GIM_1187	chrIV	473782	473877	-	CUT_GIM_RNA	CUT
CUT_GIM_0512	CUT_GIM_0512	CUT_GIM_0512	chrVII	1000769	1000906	+	CUT_GIM_RNA	CUT
CUT_GIM_0128	CUT_GIM_0128	CUT_GIM_0128	chrII	662308	662515	-	CUT_GIM_RNA	CUT
CUT_GIM_0766	CUT_GIM_0766	CUT_GIM_0766	chrXII	721768	722334	+	CUT_GIM_RNA	CUT
CUT_GIM_0922	CUT_GIM_0922	CUT_GIM_0922	chrXIII	649374	649824	-	CUT_GIM_RNA	CUT
CUT_GIM_1287	CUT_GIM_1287	CUT_GIM_1287	chrVIII	461708	462104	-	CUT_GIM_RNA	CUT
CUT_GIM_0348	CUT_GIM_0348	CUT_GIM_0348	chrXVI	834126	834324	-	CUT_GIM_RNA	CUT
CUT_GIM_0577	CUT_GIM_0577	CUT_GIM_0577	chrVII	93799	94645	-	CUT_GIM_RNA	CUT
CUT_GIM_0529	CUT_GIM_0529	CUT_GIM_0529	chrVII	656278	656458	-	CUT_GIM_RNA	CUT
CUT_GIM_0505	CUT_GIM_0505	CUT_GIM_0505	chrVII	567626	568232	+	CUT_GIM_RNA	CUT
CUT_GIM_0214	CUT_GIM_0214	CUT_GIM_0214	chrXIV	87797	88063	+	CUT_GIM_RNA	CUT
CUT_GIM_0276	CUT_GIM_0276	CUT_GIM_0276	chrXVI	860944	861348	+	CUT_GIM_RNA	CUT
CUT_GIM_0356	CUT_GIM_0356	CUT_GIM_0356	chrXVI	759135	759512	-	CUT_GIM_RNA	CUT
CUT_GIM_0438	CUT_GIM_0438	CUT_GIM_0438	chrXI	245487	245967	-	CUT_GIM_RNA	CUT
CUT_GIM_0405	CUT_GIM_0405	CUT_GIM_0405	chrXI	30911	31342	+	CUT_GIM_RNA	CUT
CUT_GIM_0783	CUT_GIM_0783	CUT_GIM_0783	chrXII	368725	369092	+	CUT_GIM_RNA	CUT
CUT_GIM_1227	CUT_GIM_1227	CUT_GIM_1227	chrIV	1242548	1242679	-	CUT_GIM_RNA	CUT
CUT_GIM_0278	CUT_GIM_0278	CUT_GIM_0278	chrXVI	876849	877222	+	CUT_GIM_RNA	CUT
CUT_GIM_1121	CUT_GIM_1121	CUT_GIM_1121	chrIV	769193	769334	+	CUT_GIM_RNA	CUT
CUT_GIM_1128	CUT_GIM_1128	CUT_GIM_1128	chrIV	501825	502091	+	CUT_GIM_RNA	CUT
CUT_GIM_0501	CUT_GIM_0501	CUT_GIM_0501	chrVII	269332	269723	+	CUT_GIM_RNA	CUT
CUT_GIM_0576	CUT_GIM_0576	CUT_GIM_0576	chrVII	289228	289254	-	CUT_GIM_RNA	CUT
CUT_GIM_1034	CUT_GIM_1034	CUT_GIM_1034	chrX	467265	467309	+	CUT_GIM_RNA	CUT
CUT_GIM_0748	CUT_GIM_0748	CUT_GIM_0748	chrIX	258298	258709	-	CUT_GIM_RNA	CUT
CUT_GIM_0997	CUT_GIM_0997	CUT_GIM_0997	chrX	717118	717974	+	CUT_GIM_RNA	CUT
CUT_GIM_0813	CUT_GIM_0813	CUT_GIM_0813	chrXII	837597	837886	+	CUT_GIM_RNA	CUT
CUT_GIM_1099	CUT_GIM_1099	CUT_GIM_1099	chrIV	621581	622115	+	CUT_GIM_RNA	CUT
CUT_GIM_1156	CUT_GIM_1156	CUT_GIM_1156	chrIV	770288	770422	+	CUT_GIM_RNA	CUT
CUT_GIM_1089	CUT_GIM_1089	CUT_GIM_1089	chrX	142762	143010	-	CUT_GIM_RNA	CUT
CUT_GIM_0162	CUT_GIM_0162	CUT_GIM_0162	chrVI	225567	225688	+	CUT_GIM_RNA	CUT
CUT_GIM_0926	CUT_GIM_0926	CUT_GIM_0926	chrXIII	494635	494645	-	CUT_GIM_RNA	CUT
CUT_GIM_0096	CUT_GIM_0096	CUT_GIM_0096	chrII	786608	786761	+	CUT_GIM_RNA	CUT
CUT_GIM_0545	CUT_GIM_0545	CUT_GIM_0545	chrVII	124076	124273	-	CUT_GIM_RNA	CUT
CUT_GIM_0323	CUT_GIM_0323	CUT_GIM_0323	chrXVI	163764	163936	-	CUT_GIM_RNA	CUT
CUT_GIM_0618	CUT_GIM_0618	CUT_GIM_0618	chrXV	642378	642619	+	CUT_GIM_RNA	CUT
CUT_GIM_0173	CUT_GIM_0173	CUT_GIM_0173	chrVI	95042	95181	-	CUT_GIM_RNA	CUT
CUT_GIM_1285	CUT_GIM_1285	CUT_GIM_1285	chrVIII	353159	353374	-	CUT_GIM_RNA	CUT
CUT_GIM_0090	CUT_GIM_0090	CUT_GIM_0090	chrII	59519	59830	+	CUT_GIM_RNA	CUT
CUT_GIM_0054	CUT_GIM_0054	CUT_GIM_0054	chrV	178241	178587	-	CUT_GIM_RNA	CUT
CUT_GIM_0995	CUT_GIM_0995	CUT_GIM_0995	chrX	73968	74960	+	CUT_GIM_RNA	CUT
CUT_GIM_0378	CUT_GIM_0378	CUT_GIM_0378	chrXI	75839	75927	+	CUT_GIM_RNA	CUT
CUT_GIM_1208	CUT_GIM_1208	CUT_GIM_1208	chrIV	1468250	1468533	-	CUT_GIM_RNA	CUT
CUT_GIM_1203	CUT_GIM_1203	CUT_GIM_1203	chrIV	1075503	1075721	-	CUT_GIM_RNA	CUT
CUT_GIM_0873	CUT_GIM_0873	CUT_GIM_0873	chrXIII	494038	494350	+	CUT_GIM_RNA	CUT
CUT_GIM_0158	CUT_GIM_0158	CUT_GIM_0158	chrVI	45715	46158	+	CUT_GIM_RNA	CUT
CUT_GIM_0009	CUT_GIM_0009	CUT_GIM_0009	chrV	84898	85291	+	CUT_GIM_RNA	CUT
CUT_GIM_0620	CUT_GIM_0620	CUT_GIM_0620	chrXV	61348	61634	+	CUT_GIM_RNA	CUT
CUT_GIM_0946	CUT_GIM_0946	CUT_GIM_0946	chrXIII	67994	68025	-	CUT_GIM_RNA	CUT
CUT_GIM_1095	CUT_GIM_1095	CUT_GIM_1095	chrIV	381727	381963	+	CUT_GIM_RNA	CUT
CUT_GIM_1274	CUT_GIM_1274	CUT_GIM_1274	chrVIII	170823	171349	+	CUT_GIM_RNA	CUT
CUT_GIM_0364	CUT_GIM_0364	CUT_GIM_0364	chrXVI	256745	256928	-	CUT_GIM_RNA	CUT
CUT_GIM_0371	CUT_GIM_0371	CUT_GIM_0371	chrXVI	497397	497713	-	CUT_GIM_RNA	CUT
CUT_GIM_1035	CUT_GIM_1035	CUT_GIM_1035	chrX	402255	402542	+	CUT_GIM_RNA	CUT
CUT_GIM_0553	CUT_GIM_0553	CUT_GIM_0553	chrVII	701118	701603	-	CUT_GIM_RNA	CUT
CUT_GIM_1073	CUT_GIM_1073	CUT_GIM_1073	chrX	650700	651263	-	CUT_GIM_RNA	CUT
CUT_GIM_0994	CUT_GIM_0994	CUT_GIM_0994	chrX	582524	582794	+	CUT_GIM_RNA	CUT
CUT_GIM_0461	CUT_GIM_0461	CUT_GIM_0461	chrVII	627300	627870	+	CUT_GIM_RNA	CUT
CUT_GIM_1053	CUT_GIM_1053	CUT_GIM_1053	chrX	172829	173053	-	CUT_GIM_RNA	CUT
CUT_GIM_1026	CUT_GIM_1026	CUT_GIM_1026	chrX	120736	120762	+	CUT_GIM_RNA	CUT
CUT_GIM_1000	CUT_GIM_1000	CUT_GIM_1000	chrX	507494	507687	+	CUT_GIM_RNA	CUT
CUT_GIM_0190	CUT_GIM_0190	CUT_GIM_0190	chrXIV	614594	614826	+	CUT_GIM_RNA	CUT
CUT_GIM_0129	CUT_GIM_0129	CUT_GIM_0129	chrII	407793	408180	-	CUT_GIM_RNA	CUT
CUT_GIM_1031	CUT_GIM_1031	CUT_GIM_1031	chrX	280978	281193	+	CUT_GIM_RNA	CUT
CUT_GIM_0982	CUT_GIM_0982	CUT_GIM_0982	chrIII	107789	107822	-	CUT_GIM_RNA	CUT
CUT_GIM_0820	CUT_GIM_0820	CUT_GIM_0820	chrXII	340883	341613	-	CUT_GIM_RNA	CUT
CUT_GIM_0482	CUT_GIM_0482	CUT_GIM_0482	chrVII	622054	622362	+	CUT_GIM_RNA	CUT
CUT_GIM_0805	CUT_GIM_0805	CUT_GIM_0805	chrXII	390925	391275	+	CUT_GIM_RNA	CUT
CUT_GIM_0154	CUT_GIM_0154	CUT_GIM_0154	chrVI	223211	223393	+	CUT_GIM_RNA	CUT
CUT_GIM_0739	CUT_GIM_0739	CUT_GIM_0739	chrIX	56258	56369	-	CUT_GIM_RNA	CUT
CUT_GIM_0898	CUT_GIM_0898	CUT_GIM_0898	chrXIII	23381	24040	+	CUT_GIM_RNA	CUT
CUT_GIM_0921	CUT_GIM_0921	CUT_GIM_0921	chrXIII	158621	158972	-	CUT_GIM_RNA	CUT
CUT_GIM_0311	CUT_GIM_0311	CUT_GIM_0311	chrXVI	381868	381947	+	CUT_GIM_RNA	CUT
CUT_GIM_0289	CUT_GIM_0289	CUT_GIM_0289	chrXVI	689554	689617	+	CUT_GIM_RNA	CUT
CUT_GIM_0667	CUT_GIM_0667	CUT_GIM_0667	chrXV	978017	978308	-	CUT_GIM_RNA	CUT
CUT_GIM_0882	CUT_GIM_0882	CUT_GIM_0882	chrXIII	129751	130358	+	CUT_GIM_RNA	CUT
CUT_GIM_1070	CUT_GIM_1070	CUT_GIM_1070	chrX	99184	99269	-	CUT_GIM_RNA	CUT
CUT_GIM_0133	CUT_GIM_0133	CUT_GIM_0133	chrII	778542	779475	-	CUT_GIM_RNA	CUT
CUT_GIM_1135	CUT_GIM_1135	CUT_GIM_1135	chrIV	1049857	1050710	+	CUT_GIM_RNA	CUT
CUT_GIM_1059	CUT_GIM_1059	CUT_GIM_1059	chrX	525361	525571	-	CUT_GIM_RNA	CUT
CUT_GIM_0872	CUT_GIM_0872	CUT_GIM_0872	chrXIII	654675	655116	+	CUT_GIM_RNA	CUT
CUT_GIM_0448	CUT_GIM_0448	CUT_GIM_0448	chrVII	962549	962612	+	CUT_GIM_RNA	CUT
CUT_GIM_1275	CUT_GIM_1275	CUT_GIM_1275	chrVIII	198651	199126	+	CUT_GIM_RNA	CUT
CUT_GIM_0211	CUT_GIM_0211	CUT_GIM_0211	chrXIV	187122	187125	+	CUT_GIM_RNA	CUT
CUT_GIM_0639	CUT_GIM_0639	CUT_GIM_0639	chrXV	313089	313708	+	CUT_GIM_RNA	CUT
CUT_GIM_0176	CUT_GIM_0176	CUT_GIM_0176	chrXIV	198485	198531	+	CUT_GIM_RNA	CUT
CUT_GIM_1196	CUT_GIM_1196	CUT_GIM_1196	chrIV	892145	892449	-	CUT_GIM_RNA	CUT
CUT_GIM_0475	CUT_GIM_0475	CUT_GIM_0475	chrVII	1065512	1065716	+	CUT_GIM_RNA	CUT
CUT_GIM_0384	CUT_GIM_0384	CUT_GIM_0384	chrXI	328091	328110	+	CUT_GIM_RNA	CUT
CUT_GIM_1011	CUT_GIM_1011	CUT_GIM_1011	chrX	717118	717625	+	CUT_GIM_RNA	CUT
CUT_GIM_0753	CUT_GIM_0753	CUT_GIM_0753	chrXII	202965	203267	+	CUT_GIM_RNA	CUT
CUT_GIM_0979	CUT_GIM_0979	CUT_GIM_0979	chrIII	124742	124998	-	CUT_GIM_RNA	CUT
CUT_GIM_0531	CUT_GIM_0531	CUT_GIM_0531	chrVII	131097	131302	-	CUT_GIM_RNA	CUT
CUT_GIM_0810	CUT_GIM_0810	CUT_GIM_0810	chrXII	253639	253909	+	CUT_GIM_RNA	CUT
CUT_GIM_0712	CUT_GIM_0712	CUT_GIM_0712	chrIX	187983	188579	+	CUT_GIM_RNA	CUT
CUT_GIM_0924	CUT_GIM_0924	CUT_GIM_0924	chrXIII	350513	350760	-	CUT_GIM_RNA	CUT
CUT_GIM_0471	CUT_GIM_0471	CUT_GIM_0471	chrVII	63786	64218	+	CUT_GIM_RNA	CUT
CUT_GIM_0167	CUT_GIM_0167	CUT_GIM_0167	chrVI	173618	174431	+	CUT_GIM_RNA	CUT
CUT_GIM_0185	CUT_GIM_0185	CUT_GIM_0185	chrXIV	774637	774917	+	CUT_GIM_RNA	CUT
CUT_GIM_1027	CUT_GIM_1027	CUT_GIM_1027	chrX	220581	221024	+	CUT_GIM_RNA	CUT
CUT_GIM_0879	CUT_GIM_0879	CUT_GIM_0879	chrXIII	814365	814495	+	CUT_GIM_RNA	CUT
CUT_GIM_0858	CUT_GIM_0858	CUT_GIM_0858	chrXII	633716	633999	-	CUT_GIM_RNA	CUT
CUT_GIM_0015	CUT_GIM_0015	CUT_GIM_0015	chrV	53857	54080	+	CUT_GIM_RNA	CUT
CUT_GIM_1150	CUT_GIM_1150	CUT_GIM_1150	chrIV	848350	848530	+	CUT_GIM_RNA	CUT
CUT_GIM_0108	CUT_GIM_0108	CUT_GIM_0108	chrII	701069	701948	+	CUT_GIM_RNA	CUT
CUT_GIM_0205	CUT_GIM_0205	CUT_GIM_0205	chrXIV	441340	442205	+	CUT_GIM_RNA	CUT
CUT_GIM_0342	CUT_GIM_0342	CUT_GIM_0342	chrXVI	752833	753010	-	CUT_GIM_RNA	CUT
CUT_GIM_0429	CUT_GIM_0429	CUT_GIM_0429	chrXI	109524	109725	-	CUT_GIM_RNA	CUT
CUT_GIM_0780	CUT_GIM_0780	CUT_GIM_0780	chrXII	260678	260800	+	CUT_GIM_RNA	CUT
CUT_GIM_1169	CUT_GIM_1169	CUT_GIM_1169	chrIV	31775	32045	-	CUT_GIM_RNA	CUT
CUT_GIM_0556	CUT_GIM_0556	CUT_GIM_0556	chrVII	608706	609083	-	CUT_GIM_RNA	CUT
CUT_GIM_0370	CUT_GIM_0370	CUT_GIM_0370	chrXVI	681714	681983	-	CUT_GIM_RNA	CUT
CUT_GIM_0938	CUT_GIM_0938	CUT_GIM_0938	chrXIII	618191	618243	-	CUT_GIM_RNA	CUT
CUT_GIM_0212	CUT_GIM_0212	CUT_GIM_0212	chrXIV	568375	568697	+	CUT_GIM_RNA	CUT
CUT_GIM_0685	CUT_GIM_0685	CUT_GIM_0685	chrXV	769733	769932	-	CUT_GIM_RNA	CUT
CUT_GIM_0503	CUT_GIM_0503	CUT_GIM_0503	chrVII	1069628	1070349	+	CUT_GIM_RNA	CUT
CUT_GIM_0607	CUT_GIM_0607	CUT_GIM_0607	chrXV	463014	463014	+	CUT_GIM_RNA	CUT
CUT_GIM_0250	CUT_GIM_0250	CUT_GIM_0250	chrXIV	358878	359251	-	CUT_GIM_RNA	CUT
CUT_GIM_0641	CUT_GIM_0641	CUT_GIM_0641	chrXV	274003	274798	+	CUT_GIM_RNA	CUT
CUT_GIM_1144	CUT_GIM_1144	CUT_GIM_1144	chrIV	1319434	1319718	+	CUT_GIM_RNA	CUT
CUT_GIM_0222	CUT_GIM_0222	CUT_GIM_0222	chrXIV	635415	635690	-	CUT_GIM_RNA	CUT
CUT_GIM_1170	CUT_GIM_1170	CUT_GIM_1170	chrIV	805933	806213	-	CUT_GIM_RNA	CUT
CUT_GIM_0462	CUT_GIM_0462	CUT_GIM_0462	chrVII	702064	702631	+	CUT_GIM_RNA	CUT
CUT_GIM_1188	CUT_GIM_1188	CUT_GIM_1188	chrIV	155327	155966	-	CUT_GIM_RNA	CUT
CUT_GIM_0944	CUT_GIM_0944	CUT_GIM_0944	chrXIII	305821	305871	-	CUT_GIM_RNA	CUT
CUT_GIM_0181	CUT_GIM_0181	CUT_GIM_0181	chrXIV	441340	441872	+	CUT_GIM_RNA	CUT
CUT_GIM_0219	CUT_GIM_0219	CUT_GIM_0219	chrXIV	614158	614420	-	CUT_GIM_RNA	CUT
CUT_GIM_0705	CUT_GIM_0705	CUT_GIM_0705	chrXV	867900	868079	-	CUT_GIM_RNA	CUT
CUT_GIM_0701	CUT_GIM_0701	CUT_GIM_0701	chrXV	380401	380737	-	CUT_GIM_RNA	CUT
CUT_GIM_1273	CUT_GIM_1273	CUT_GIM_1273	chrVIII	122810	123082	+	CUT_GIM_RNA	CUT
CUT_GIM_1127	CUT_GIM_1127	CUT_GIM_1127	chrIV	1297020	1297866	+	CUT_GIM_RNA	CUT
CUT_GIM_0594	CUT_GIM_0594	CUT_GIM_0594	chrXV	1003928	1004076	+	CUT_GIM_RNA	CUT
CUT_GIM_0770	CUT_GIM_0770	CUT_GIM_0770	chrXII	371422	371622	+	CUT_GIM_RNA	CUT
CUT_GIM_1158	CUT_GIM_1158	CUT_GIM_1158	chrIV	310432	311160	+	CUT_GIM_RNA	CUT
CUT_GIM_0301	CUT_GIM_0301	CUT_GIM_0301	chrXVI	319140	319464	+	CUT_GIM_RNA	CUT
CUT_GIM_0942	CUT_GIM_0942	CUT_GIM_0942	chrXIII	141655	141953	-	CUT_GIM_RNA	CUT
CUT_GIM_1266	CUT_GIM_1266	CUT_GIM_1266	chrVIII	451206	451369	+	CUT_GIM_RNA	CUT
CUT_GIM_0488	CUT_GIM_0488	CUT_GIM_0488	chrVII	398285	398644	+	CUT_GIM_RNA	CUT
CUT_GIM_0123	CUT_GIM_0123	CUT_GIM_0123	chrII	340891	341243	-	CUT_GIM_RNA	CUT
CUT_GIM_1245	CUT_GIM_1245	CUT_GIM_1245	chrI	58678	59661	+	CUT_GIM_RNA	CUT
CUT_GIM_1081	CUT_GIM_1081	CUT_GIM_1081	chrX	461414	461561	-	CUT_GIM_RNA	CUT
CUT_GIM_0341	CUT_GIM_0341	CUT_GIM_0341	chrXVI	828336	828741	-	CUT_GIM_RNA	CUT
CUT_GIM_1125	CUT_GIM_1125	CUT_GIM_1125	chrIV	421929	422467	+	CUT_GIM_RNA	CUT
CUT_GIM_0050	CUT_GIM_0050	CUT_GIM_0050	chrV	438838	439193	-	CUT_GIM_RNA	CUT
CUT_GIM_0854	CUT_GIM_0854	CUT_GIM_0854	chrXII	264810	265231	-	CUT_GIM_RNA	CUT
CUT_GIM_0558	CUT_GIM_0558	CUT_GIM_0558	chrVII	677301	677554	-	CUT_GIM_RNA	CUT
CUT_GIM_1005	CUT_GIM_1005	CUT_GIM_1005	chrX	526026	526383	+	CUT_GIM_RNA	CUT
CUT_GIM_0468	CUT_GIM_0468	CUT_GIM_0468	chrVII	385132	385223	+	CUT_GIM_RNA	CUT
CUT_GIM_0660	CUT_GIM_0660	CUT_GIM_0660	chrXV	953615	954081	-	CUT_GIM_RNA	CUT
CUT_GIM_0902	CUT_GIM_0902	CUT_GIM_0902	chrXIII	297121	297207	+	CUT_GIM_RNA	CUT
CUT_GIM_0552	CUT_GIM_0552	CUT_GIM_0552	chrVII	345021	345743	-	CUT_GIM_RNA	CUT
CUT_GIM_0409	CUT_GIM_0409	CUT_GIM_0409	chrXI	259996	260799	+	CUT_GIM_RNA	CUT
CUT_GIM_1032	CUT_GIM_1032	CUT_GIM_1032	chrX	577101	577130	+	CUT_GIM_RNA	CUT
CUT_GIM_0004	CUT_GIM_0004	CUT_GIM_0004	chrV	326187	326424	+	CUT_GIM_RNA	CUT
CUT_GIM_0059	CUT_GIM_0059	CUT_GIM_0059	chrV	259533	259829	-	CUT_GIM_RNA	CUT
CUT_GIM_0855	CUT_GIM_0855	CUT_GIM_0855	chrXII	703979	704324	-	CUT_GIM_RNA	CUT
CUT_GIM_0935	CUT_GIM_0935	CUT_GIM_0935	chrXIII	904063	904530	-	CUT_GIM_RNA	CUT
CUT_GIM_0680	CUT_GIM_0680	CUT_GIM_0680	chrXV	818110	818342	-	CUT_GIM_RNA	CUT
CUT_GIM_0847	CUT_GIM_0847	CUT_GIM_0847	chrXII	398934	399409	-	CUT_GIM_RNA	CUT
CUT_GIM_0557	CUT_GIM_0557	CUT_GIM_0557	chrVII	581443	581691	-	CUT_GIM_RNA	CUT
CUT_GIM_0573	CUT_GIM_0573	CUT_GIM_0573	chrVII	535011	535337	-	CUT_GIM_RNA	CUT
CUT_GIM_0287	CUT_GIM_0287	CUT_GIM_0287	chrXVI	373577	373704	+	CUT_GIM_RNA	CUT
CUT_GIM_0773	CUT_GIM_0773	CUT_GIM_0773	chrXII	721768	721835	+	CUT_GIM_RNA	CUT
CUT_GIM_0644	CUT_GIM_0644	CUT_GIM_0644	chrXV	139203	139505	+	CUT_GIM_RNA	CUT
CUT_GIM_1292	CUT_GIM_1292	CUT_GIM_1292	chrVIII	332577	332887	-	CUT_GIM_RNA	CUT
CUT_GIM_1123	CUT_GIM_1123	CUT_GIM_1123	chrIV	519944	520863	+	CUT_GIM_RNA	CUT
CUT_GIM_1071	CUT_GIM_1071	CUT_GIM_1071	chrX	403011	403315	-	CUT_GIM_RNA	CUT
CUT_GIM_0137	CUT_GIM_0137	CUT_GIM_0137	chrII	44870	45021	-	CUT_GIM_RNA	CUT
CUT_GIM_0838	CUT_GIM_0838	CUT_GIM_0838	chrXII	672577	672840	-	CUT_GIM_RNA	CUT
CUT_GIM_0989	CUT_GIM_0989	CUT_GIM_0989	chrIII	61181	61441	-	CUT_GIM_RNA	CUT
CUT_GIM_0453	CUT_GIM_0453	CUT_GIM_0453	chrVII	234712	235108	+	CUT_GIM_RNA	CUT
CUT_GIM_0170	CUT_GIM_0170	CUT_GIM_0170	chrVI	149450	149750	-	CUT_GIM_RNA	CUT
CUT_GIM_0265	CUT_GIM_0265	CUT_GIM_0265	chrXVI	39121	39431	+	CUT_GIM_RNA	CUT
CUT_GIM_0975	CUT_GIM_0975	CUT_GIM_0975	chrIII	179050	179237	+	CUT_GIM_RNA	CUT
CUT_GIM_0734	CUT_GIM_0734	CUT_GIM_0734	chrIX	271775	271889	-	CUT_GIM_RNA	CUT
CUT_GIM_1036	CUT_GIM_1036	CUT_GIM_1036	chrX	458556	458737	+	CUT_GIM_RNA	CUT
CUT_GIM_0243	CUT_GIM_0243	CUT_GIM_0243	chrXIV	507171	507326	-	CUT_GIM_RNA	CUT
CUT_GIM_0775	CUT_GIM_0775	CUT_GIM_0775	chrXII	605661	605917	+	CUT_GIM_RNA	CUT
CUT_GIM_0267	CUT_GIM_0267	CUT_GIM_0267	chrXVI	503540	503746	+	CUT_GIM_RNA	CUT
CUT_GIM_0466	CUT_GIM_0466	CUT_GIM_0466	chrVII	567626	567998	+	CUT_GIM_RNA	CUT
CUT_GIM_0436	CUT_GIM_0436	CUT_GIM_0436	chrXI	125285	125533	-	CUT_GIM_RNA	CUT
CUT_GIM_0880	CUT_GIM_0880	CUT_GIM_0880	chrXIII	636190	636586	+	CUT_GIM_RNA	CUT
CUT_GIM_1257	CUT_GIM_1257	CUT_GIM_1257	chrVIII	151020	151685	+	CUT_GIM_RNA	CUT
CUT_GIM_1162	CUT_GIM_1162	CUT_GIM_1162	chrIV	356874	356954	-	CUT_GIM_RNA	CUT
CUT_GIM_1044	CUT_GIM_1044	CUT_GIM_1044	chrX	118786	119663	-	CUT_GIM_RNA	CUT
CUT_GIM_1018	CUT_GIM_1018	CUT_GIM_1018	chrX	455468	456270	+	CUT_GIM_RNA	CUT
CUT_GIM_0801	CUT_GIM_0801	CUT_GIM_0801	chrXII	229913	230627	+	CUT_GIM_RNA	CUT
CUT_GIM_0472	CUT_GIM_0472	CUT_GIM_0472	chrVII	942675	942821	+	CUT_GIM_RNA	CUT
CUT_GIM_0815	CUT_GIM_0815	CUT_GIM_0815	chrXII	576130	576578	-	CUT_GIM_RNA	CUT
CUT_GIM_0549	CUT_GIM_0549	CUT_GIM_0549	chrVII	508339	509325	-	CUT_GIM_RNA	CUT
CUT_GIM_0925	CUT_GIM_0925	CUT_GIM_0925	chrXIII	628520	628754	-	CUT_GIM_RNA	CUT
CUT_GIM_0936	CUT_GIM_0936	CUT_GIM_0936	chrXIII	563652	564209	-	CUT_GIM_RNA	CUT
CUT_GIM_0615	CUT_GIM_0615	CUT_GIM_0615	chrXV	74092	74424	+	CUT_GIM_RNA	CUT
CUT_GIM_0057	CUT_GIM_0057	CUT_GIM_0057	chrV	57994	58134	-	CUT_GIM_RNA	CUT
CUT_GIM_1258	CUT_GIM_1258	CUT_GIM_1258	chrVIII	461684	461960	+	CUT_GIM_RNA	CUT
CUT_GIM_0538	CUT_GIM_0538	CUT_GIM_0538	chrVII	557424	557541	-	CUT_GIM_RNA	CUT
CUT_GIM_0865	CUT_GIM_0865	CUT_GIM_0865	chrXII	833277	833686	-	CUT_GIM_RNA	CUT
CUT_GIM_0863	CUT_GIM_0863	CUT_GIM_0863	chrXII	971386	972237	-	CUT_GIM_RNA	CUT
CUT_GIM_0188	CUT_GIM_0188	CUT_GIM_0188	chrXIV	302389	302501	+	CUT_GIM_RNA	CUT
CUT_GIM_0771	CUT_GIM_0771	CUT_GIM_0771	chrXII	932443	932649	+	CUT_GIM_RNA	CUT
CUT_GIM_0674	CUT_GIM_0674	CUT_GIM_0674	chrXV	348212	348546	-	CUT_GIM_RNA	CUT
CUT_GIM_1288	CUT_GIM_1288	CUT_GIM_1288	chrVIII	341901	342086	-	CUT_GIM_RNA	CUT
CUT_GIM_1250	CUT_GIM_1250	CUT_GIM_1250	chrI	82757	82806	+	CUT_GIM_RNA	CUT
CUT_GIM_0374	CUT_GIM_0374	CUT_GIM_0374	chrXVI	117375	118026	-	CUT_GIM_RNA	CUT
CUT_GIM_0736	CUT_GIM_0736	CUT_GIM_0736	chrIX	362808	362949	-	CUT_GIM_RNA	CUT
CUT_GIM_0413	CUT_GIM_0413	CUT_GIM_0413	chrXI	618628	618700	-	CUT_GIM_RNA	CUT
CUT_GIM_1232	CUT_GIM_1232	CUT_GIM_1232	chrIV	443860	444190	-	CUT_GIM_RNA	CUT
CUT_GIM_0555	CUT_GIM_0555	CUT_GIM_0555	chrVII	809409	809542	-	CUT_GIM_RNA	CUT
CUT_GIM_0952	CUT_GIM_0952	CUT_GIM_0952	chrXIII	472555	472756	-	CUT_GIM_RNA	CUT
CUT_GIM_1129	CUT_GIM_1129	CUT_GIM_1129	chrIV	1149676	1150028	+	CUT_GIM_RNA	CUT
CUT_GIM_0396	CUT_GIM_0396	CUT_GIM_0396	chrXI	389950	390215	+	CUT_GIM_RNA	CUT
CUT_GIM_0772	CUT_GIM_0772	CUT_GIM_0772	chrXII	347238	347818	+	CUT_GIM_RNA	CUT
CUT_GIM_1179	CUT_GIM_1179	CUT_GIM_1179	chrIV	489081	489210	-	CUT_GIM_RNA	CUT
CUT_GIM_1299	CUT_GIM_1299	CUT_GIM_1299	chrVIII	450368	450707	-	CUT_GIM_RNA	CUT
CUT_GIM_1042	CUT_GIM_1042	CUT_GIM_1042	chrX	289685	289919	+	CUT_GIM_RNA	CUT
CUT_GIM_0087	CUT_GIM_0087	CUT_GIM_0087	chrII	734822	735014	+	CUT_GIM_RNA	CUT
CUT_GIM_0478	CUT_GIM_0478	CUT_GIM_0478	chrVII	637032	637179	+	CUT_GIM_RNA	CUT
CUT_GIM_1284	CUT_GIM_1284	CUT_GIM_1284	chrVIII	335787	336178	-	CUT_GIM_RNA	CUT
CUT_GIM_0999	CUT_GIM_0999	CUT_GIM_0999	chrX	31401	31776	+	CUT_GIM_RNA	CUT
CUT_GIM_0112	CUT_GIM_0112	CUT_GIM_0112	chrII	444975	445432	+	CUT_GIM_RNA	CUT
CUT_GIM_1313	CUT_GIM_1313	CUT_GIM_1313	chrVIII	16890	17199	-	CUT_GIM_RNA	CUT
CUT_GIM_0862	CUT_GIM_0862	CUT_GIM_0862	chrXII	168312	168798	-	CUT_GIM_RNA	CUT
CUT_GIM_0634	CUT_GIM_0634	CUT_GIM_0634	chrXV	397681	398044	+	CUT_GIM_RNA	CUT
CUT_GIM_0671	CUT_GIM_0671	CUT_GIM_0671	chrXV	944303	944401	-	CUT_GIM_RNA	CUT
CUT_GIM_1033	CUT_GIM_1033	CUT_GIM_1033	chrX	349573	349735	+	CUT_GIM_RNA	CUT
CUT_GIM_1024	CUT_GIM_1024	CUT_GIM_1024	chrX	137074	137174	+	CUT_GIM_RNA	CUT
CUT_GIM_0500	CUT_GIM_0500	CUT_GIM_0500	chrVII	147856	148364	+	CUT_GIM_RNA	CUT
CUT_GIM_0781	CUT_GIM_0781	CUT_GIM_0781	chrXII	660460	660674	+	CUT_GIM_RNA	CUT
CUT_GIM_1304	CUT_GIM_1304	CUT_GIM_1304	chrVIII	518737	519226	-	CUT_GIM_RNA	CUT
CUT_GIM_0684	CUT_GIM_0684	CUT_GIM_0684	chrXV	967620	967938	-	CUT_GIM_RNA	CUT
CUT_GIM_1244	CUT_GIM_1244	CUT_GIM_1244	chrI	227511	227702	+	CUT_GIM_RNA	CUT
CUT_GIM_0984	CUT_GIM_0984	CUT_GIM_0984	chrIII	122257	122397	-	CUT_GIM_RNA	CUT
CUT_GIM_0703	CUT_GIM_0703	CUT_GIM_0703	chrXV	880446	880753	-	CUT_GIM_RNA	CUT
CUT_GIM_0010	CUT_GIM_0010	CUT_GIM_0010	chrV	316800	317100	+	CUT_GIM_RNA	CUT
CUT_GIM_0645	CUT_GIM_0645	CUT_GIM_0645	chrXV	231821	232691	+	CUT_GIM_RNA	CUT
CUT_GIM_0563	CUT_GIM_0563	CUT_GIM_0563	chrVII	652902	653167	-	CUT_GIM_RNA	CUT
CUT_GIM_0325	CUT_GIM_0325	CUT_GIM_0325	chrXVI	131614	132206	-	CUT_GIM_RNA	CUT
CUT_GIM_0244	CUT_GIM_0244	CUT_GIM_0244	chrXIV	559063	559204	-	CUT_GIM_RNA	CUT
CUT_GIM_0235	CUT_GIM_0235	CUT_GIM_0235	chrXIV	433977	434564	-	CUT_GIM_RNA	CUT
CUT_GIM_0663	CUT_GIM_0663	CUT_GIM_0663	chrXV	877973	878099	-	CUT_GIM_RNA	CUT
CUT_GIM_0901	CUT_GIM_0901	CUT_GIM_0901	chrXIII	475864	476276	+	CUT_GIM_RNA	CUT
CUT_GIM_0977	CUT_GIM_0977	CUT_GIM_0977	chrIII	39039	39549	+	CUT_GIM_RNA	CUT
CUT_GIM_1041	CUT_GIM_1041	CUT_GIM_1041	chrX	119496	119722	+	CUT_GIM_RNA	CUT
CUT_GIM_0617	CUT_GIM_0617	CUT_GIM_0617	chrXV	128332	128442	+	CUT_GIM_RNA	CUT
CUT_GIM_0032	CUT_GIM_0032	CUT_GIM_0032	chrV	9942	10363	+	CUT_GIM_RNA	CUT
CUT_GIM_0049	CUT_GIM_0049	CUT_GIM_0049	chrV	144437	144670	-	CUT_GIM_RNA	CUT
CUT_GIM_1083	CUT_GIM_1083	CUT_GIM_1083	chrX	323051	323155	-	CUT_GIM_RNA	CUT
CUT_GIM_0066	CUT_GIM_0066	CUT_GIM_0066	chrV	41829	42715	-	CUT_GIM_RNA	CUT
CUT_GIM_0672	CUT_GIM_0672	CUT_GIM_0672	chrXV	363720	364171	-	CUT_GIM_RNA	CUT
CUT_GIM_0668	CUT_GIM_0668	CUT_GIM_0668	chrXV	1003808	1004163	-	CUT_GIM_RNA	CUT
CUT_GIM_0245	CUT_GIM_0245	CUT_GIM_0245	chrXIV	575961	576201	-	CUT_GIM_RNA	CUT
CUT_GIM_0827	CUT_GIM_0827	CUT_GIM_0827	chrXII	505514	505816	-	CUT_GIM_RNA	CUT
CUT_GIM_0443	CUT_GIM_0443	CUT_GIM_0443	chrVII	884485	884764	+	CUT_GIM_RNA	CUT
CUT_GIM_0968	CUT_GIM_0968	CUT_GIM_0968	chrIII	200938	201222	+	CUT_GIM_RNA	CUT
CUT_GIM_1025	CUT_GIM_1025	CUT_GIM_1025	chrX	104445	105051	+	CUT_GIM_RNA	CUT
CUT_GIM_0584	CUT_GIM_0584	CUT_GIM_0584	chrVII	667508	667813	-	CUT_GIM_RNA	CUT
CUT127	CUT127	CUT127	chrVII	97159	97303	+	CUT_S_RNA	CUT
CUT664	CUT664	CUT664	chrIX	259614	259910	-	CUT_S_RNA	CUT
CUT335	CUT335	CUT335	chrXIV	417833	418153	+	CUT_S_RNA	CUT
CUT519	CUT519	CUT519	chrIV	1031733	1032101	-	CUT_S_RNA	CUT
CUT830	CUT830	CUT830	chrXV	226982	227365	-	CUT_S_RNA	CUT
CUT037	CUT037	CUT037	chrII	714685	715477	+	CUT_S_RNA	CUT
CUT825	CUT825	CUT825	chrXV	146822	147174	-	CUT_S_RNA	CUT
CUT729	CUT729	CUT729	chrXI	614088	614696	-	CUT_S_RNA	CUT
CUT126	CUT126	CUT126	chrVII	95141	95751	+	CUT_S_RNA	CUT
CUT130	CUT130	CUT130	chrVII	166725	166901	+	CUT_S_RNA	CUT
CUT149	CUT149	CUT149	chrVII	605751	606119	+	CUT_S_RNA	CUT
CUT509	CUT509	CUT509	chrIV	768107	768371	-	CUT_S_RNA	CUT
CUT156	CUT156	CUT156	chrVII	786022	786326	+	CUT_S_RNA	CUT
CUT112	CUT112	CUT112	chrV	326173	326549	+	CUT_S_RNA	CUT
CUT821	CUT821	CUT821	chrXV	73358	73534	-	CUT_S_RNA	CUT
CUT801	CUT801	CUT801	chrXIV	107159	108183	-	CUT_S_RNA	CUT
CUT103	CUT103	CUT103	chrV	9969	10497	+	CUT_S_RNA	CUT
CUT874	CUT874	CUT874	chrXV	1010393	1010793	-	CUT_S_RNA	CUT
CUT604	CUT604	CUT604	chrVII	515899	516267	-	CUT_S_RNA	CUT
CUT403	CUT403	CUT403	chrXVI	84473	85537	+	CUT_S_RNA	CUT
CUT456	CUT456	CUT456	chrII	549130	549538	-	CUT_S_RNA	CUT
CUT486	CUT486	CUT486	chrIV	345077	345445	-	CUT_S_RNA	CUT
CUT074	CUT074	CUT074	chrIV	963281	963409	+	CUT_S_RNA	CUT
CUT185	CUT185	CUT185	chrIX	32601	32721	+	CUT_S_RNA	CUT
CUT740	CUT740	CUT740	chrXII	543347	543667	-	CUT_S_RNA	CUT
CUT536	CUT536	CUT536	chrIV	1436417	1436697	-	CUT_S_RNA	CUT
CUT864	CUT864	CUT864	chrXV	818136	818440	-	CUT_S_RNA	CUT
CUT600	CUT600	CUT600	chrVII	412621	413172	-	CUT_S_RNA	CUT
CUT197	CUT197	CUT197	chrX	109808	110512	+	CUT_S_RNA	CUT
CUT223	CUT223	CUT223	chrX	664710	664902	+	CUT_S_RNA	CUT
CUT218	CUT218	CUT218	chrX	604484	604916	+	CUT_S_RNA	CUT
CUT873	CUT873	CUT873	chrXV	1003418	1004090	-	CUT_S_RNA	CUT
CUT309	CUT309	CUT309	chrXIII	715650	716498	+	CUT_S_RNA	CUT
CUT441	CUT441	CUT441	chrI	151617	152033	-	CUT_S_RNA	CUT
CUT663	CUT663	CUT663	chrIX	226064	226280	-	CUT_S_RNA	CUT
CUT431	CUT431	CUT431	chrXVI	697126	697734	+	CUT_S_RNA	CUT
CUT255	CUT255	CUT255	chrXII	267856	268072	+	CUT_S_RNA	CUT
CUT520	CUT520	CUT520	chrIV	1036637	1037005	-	CUT_S_RNA	CUT
CUT296	CUT296	CUT296	chrXIII	370762	371210	+	CUT_S_RNA	CUT
CUT361	CUT361	CUT361	chrXV	168330	168434	+	CUT_S_RNA	CUT
CUT756	CUT756	CUT756	chrXII	1043022	1043606	-	CUT_S_RNA	CUT
CUT137	CUT137	CUT137	chrVII	346512	346648	+	CUT_S_RNA	CUT
CUT632	CUT632	CUT632	chrVII	993729	994073	-	CUT_S_RNA	CUT
CUT164	CUT164	CUT164	chrVII	974933	975757	+	CUT_S_RNA	CUT
CUT595	CUT595	CUT595	chrVII	314212	314372	-	CUT_S_RNA	CUT
CUT641	CUT641	CUT641	chrVIII	139389	139797	-	CUT_S_RNA	CUT
CUT429	CUT429	CUT429	chrXVI	691902	692158	+	CUT_S_RNA	CUT
CUT181	CUT181	CUT181	chrVIII	411647	412327	+	CUT_S_RNA	CUT
CUT389	CUT389	CUT389	chrXV	825252	826292	+	CUT_S_RNA	CUT
CUT730	CUT730	CUT730	chrXII	115534	116142	-	CUT_S_RNA	CUT
CUT205	CUT205	CUT205	chrX	180803	180939	+	CUT_S_RNA	CUT
CUT159	CUT159	CUT159	chrVII	859822	860102	+	CUT_S_RNA	CUT
CUT266	CUT266	CUT266	chrXII	660471	660647	+	CUT_S_RNA	CUT
CUT430	CUT430	CUT430	chrXVI	695358	695694	+	CUT_S_RNA	CUT
CUT311	CUT311	CUT311	chrXIII	861458	861866	+	CUT_S_RNA	CUT
CUT075	CUT075	CUT075	chrIV	974585	975017	+	CUT_S_RNA	CUT
CUT307	CUT307	CUT307	chrXIII	652922	653050	+	CUT_S_RNA	CUT
CUT274	CUT274	CUT274	chrXII	899719	899895	+	CUT_S_RNA	CUT
CUT078	CUT078	CUT078	chrIV	1072753	1073289	+	CUT_S_RNA	CUT
CUT893	CUT893	CUT893	chrXVI	348290	348858	-	CUT_S_RNA	CUT
CUT091	CUT091	CUT091	chrIV	1302229	1302717	+	CUT_S_RNA	CUT
CUT080	CUT080	CUT080	chrIV	1092760	1093256	+	CUT_S_RNA	CUT
CUT613	CUT613	CUT613	chrVII	669755	670571	-	CUT_S_RNA	CUT
CUT416	CUT416	CUT416	chrXVI	369790	370110	+	CUT_S_RNA	CUT
CUT886	CUT886	CUT886	chrXVI	163670	163918	-	CUT_S_RNA	CUT
CUT592	CUT592	CUT592	chrVII	256178	257274	-	CUT_S_RNA	CUT
CUT256	CUT256	CUT256	chrXII	395176	395584	+	CUT_S_RNA	CUT
CUT534	CUT534	CUT534	chrIV	1383905	1384769	-	CUT_S_RNA	CUT
CUT850	CUT850	CUT850	chrXV	632589	632861	-	CUT_S_RNA	CUT
CUT144	CUT144	CUT144	chrVII	484190	484982	+	CUT_S_RNA	CUT
CUT484	CUT484	CUT484	chrIV	309525	309717	-	CUT_S_RNA	CUT
CUT464	CUT464	CUT464	chrIII	130072	130456	-	CUT_S_RNA	CUT
CUT479	CUT479	CUT479	chrIV	215380	215796	-	CUT_S_RNA	CUT
CUT029	CUT029	CUT029	chrII	576349	576773	+	CUT_S_RNA	CUT
CUT767	CUT767	CUT767	chrXIII	352414	353022	-	CUT_S_RNA	CUT
CUT249	CUT249	CUT249	chrXII	185082	185458	+	CUT_S_RNA	CUT
CUT546	CUT546	CUT546	chrV	62821	63724	-	CUT_S_RNA	CUT
CUT036	CUT036	CUT036	chrII	707029	707317	+	CUT_S_RNA	CUT
CUT892	CUT892	CUT892	chrXVI	254382	254526	-	CUT_S_RNA	CUT
CUT897	CUT897	CUT897	chrXVI	410618	411650	-	CUT_S_RNA	CUT
CUT190	CUT190	CUT190	chrIX	212196	212452	+	CUT_S_RNA	CUT
CUT818	CUT818	CUT818	chrXIV	663294	663662	-	CUT_S_RNA	CUT
CUT023	CUT023	CUT023	chrII	381378	381642	+	CUT_S_RNA	CUT
CUT693	CUT693	CUT693	chrX	506963	507531	-	CUT_S_RNA	CUT
CUT798	CUT798	CUT798	chrXIV	67862	68415	-	CUT_S_RNA	CUT
CUT386	CUT386	CUT386	chrXV	642393	642697	+	CUT_S_RNA	CUT
CUT708	CUT708	CUT708	chrXI	257891	258403	-	CUT_S_RNA	CUT
CUT889	CUT889	CUT889	chrXVI	195678	195806	-	CUT_S_RNA	CUT
CUT095	CUT095	CUT095	chrIV	1359165	1359493	+	CUT_S_RNA	CUT
CUT177	CUT177	CUT177	chrVIII	193833	194176	+	CUT_S_RNA	CUT
CUT870	CUT870	CUT870	chrXV	953890	954082	-	CUT_S_RNA	CUT
CUT116	CUT116	CUT116	chrV	422189	422613	+	CUT_S_RNA	CUT
CUT702	CUT702	CUT702	chrXI	38236	38820	-	CUT_S_RNA	CUT
CUT872	CUT872	CUT872	chrXV	982306	982522	-	CUT_S_RNA	CUT
CUT122	CUT122	CUT122	chrVI	106927	107215	+	CUT_S_RNA	CUT
CUT052	CUT052	CUT052	chrIV	192400	192568	+	CUT_S_RNA	CUT
CUT167	CUT167	CUT167	chrVII	1017964	1019548	+	CUT_S_RNA	CUT
CUT120	CUT120	CUT120	chrVI	23105	23329	+	CUT_S_RNA	CUT
CUT774	CUT774	CUT774	chrXIII	448310	448958	-	CUT_S_RNA	CUT
CUT194	CUT194	CUT194	chrIX	274090	274538	+	CUT_S_RNA	CUT
CUT006	CUT006	CUT006	chrII	96352	96568	+	CUT_S_RNA	CUT
CUT446	CUT446	CUT446	chrII	299292	299884	-	CUT_S_RNA	CUT
CUT507	CUT507	CUT507	chrIV	703835	704187	-	CUT_S_RNA	CUT
CUT409	CUT409	CUT409	chrXVI	226042	226434	+	CUT_S_RNA	CUT
CUT550	CUT550	CUT550	chrV	178206	178574	-	CUT_S_RNA	CUT
CUT247	CUT247	CUT247	chrXII	105402	105546	+	CUT_S_RNA	CUT
CUT168	CUT168	CUT168	chrVII	1038789	1039293	+	CUT_S_RNA	CUT
CUT063	CUT063	CUT063	chrIV	486117	486405	+	CUT_S_RNA	CUT
CUT711	CUT711	CUT711	chrXI	285843	286371	-	CUT_S_RNA	CUT
CUT434	CUT434	CUT434	chrXVI	876823	877279	+	CUT_S_RNA	CUT
CUT097	CUT097	CUT097	chrIV	1367029	1367437	+	CUT_S_RNA	CUT
CUT333	CUT333	CUT333	chrXIV	374329	374513	+	CUT_S_RNA	CUT
CUT656	CUT656	CUT656	chrVIII	460984	462088	-	CUT_S_RNA	CUT
CUT914	CUT914	CUT914	chrXVI	767057	767449	-	CUT_S_RNA	CUT
CUT204	CUT204	CUT204	chrX	155011	155859	+	CUT_S_RNA	CUT
CUT118	CUT118	CUT118	chrV	483318	484518	+	CUT_S_RNA	CUT
CUT349	CUT349	CUT349	chrXIV	705938	706106	+	CUT_S_RNA	CUT
CUT353	CUT353	CUT353	chrXIV	763076	764044	+	CUT_S_RNA	CUT
CUT090	CUT090	CUT090	chrIV	1270845	1271005	+	CUT_S_RNA	CUT
CUT472	CUT472	CUT472	chrIV	98860	99316	-	CUT_S_RNA	CUT
CUT807	CUT807	CUT807	chrXIV	358469	358925	-	CUT_S_RNA	CUT
CUT014	CUT014	CUT014	chrII	324513	325361	+	CUT_S_RNA	CUT
CUT370	CUT370	CUT370	chrXV	383618	383962	+	CUT_S_RNA	CUT
CUT512	CUT512	CUT512	chrIV	784267	784435	-	CUT_S_RNA	CUT
CUT172	CUT172	CUT172	chrVIII	77301	77421	+	CUT_S_RNA	CUT
CUT154	CUT154	CUT154	chrVII	730550	730806	+	CUT_S_RNA	CUT
CUT051	CUT051	CUT051	chrIV	163432	163752	+	CUT_S_RNA	CUT
CUT703	CUT703	CUT703	chrXI	95835	95979	-	CUT_S_RNA	CUT
CUT324	CUT324	CUT324	chrXIV	234042	234186	+	CUT_S_RNA	CUT
[truncated: 10,696 more rows]

## Sheet: Column description
	GeneID	Gene Identifier
	Syst_name	Systematic name
	Gene	Gene name
	Chr	Chromosome number
	Start	transcript strart
	End	transcript end
	Strand	Strand (+ or -)
	type	Type of transcript (gene, dubious, noncoding_RNA, rRNA_ETS, rRNA_ITS, rRNA_region, snoRNA, snRNA, telomerase_RNA, transposon_gene, transposon_region, tRNA, CUT_GIM_RNA, CUT_S_RNA, SUT_RNA, XUT_RNA)
	Categ	Category. For genes = PTC, noPTC Upf1-enriched, noPTC, Possible PTC, unknown. Otherwise; mitoch, Ty (transposon), SUT_XUT (SUT and XUT), CUT (GIM lab or SGD), tRNA, rRNA (ETS, ITS or rRNA).
